# Supplementary material
Source: publisher figshare collection journal article supplement (https://acs.figshare.com/ndownloader/files/8658505)
Supplement: Supplementary file 1 [file 8658505]

# Transition metal-free homologative cross-coupling of aldehydes and ketones with geminal bis(boron) compounds

Thomas C. Stephens and Graham Pattison\*

Department of Chemistry  
University of Warwick  
Gibbet Hill Road  
Coventry

E-mail: [graham.pattison@warwick.ac.uk](mailto:graham.pattison@warwick.ac.uk)

## Supporting Information

### Contents

|    |                                                               |       |
|----|---------------------------------------------------------------|-------|
| 1. | General Information                                           | pg 2  |
| 2. | Reaction Optimization                                         | pg 3  |
| 3. | Experimental Procedures / Characterization data               | pg 8  |
| 4. | Copies of NMR spectra for all new compounds                   | pg 23 |
| 5. | HPLC analysis for enantioenriched homologative cross-coupling | pg 51 |

## General Information

Solvents and commercially available reagents were purchased from standard chemical suppliers (Fisher, Sigma-Aldrich, VWR, Fluorochem) and used as received without further purification or drying. Reactions were performed under an atmosphere of dry nitrogen gas. Thin layer chromatography (TLC) was performed on Merck DF-Alufoilen 60F254 0.2 mm precoated plates. Product spots were visualized by UV light at 254 nm, and subsequently developed using vanillin or potassium permanganate as appropriate. Flash column chromatography was carried out using silica gel (Apollo Scientific 60Å particle size 40-63 micron). Melting points are uncorrected. Infra-red spectra were recorded on a Bruker Alpha-P ATR instrument on the neat compound. NMR spectra were recorded on a Bruker DPX-300, Bruker Avance III HD 300 MHz or Bruker Avance III HD 500 MHz instrument. For  $^1\text{H}$  NMR spectra, chemical shifts ( $\delta$ ) are quoted in parts per million (ppm) downfield of tetramethylsilane, using residual protonated solvent as internal standard ( $\text{CDCl}_3$  at 7.26 ppm,  $\text{d}_6$ -acetone at 2.05 ppm). Abbreviations used in the description of resonances are: s (singlet), d (doublet), t (triplet), q, (quartet), app (apparent), br (broad). Coupling constants ( $J$ ) are quoted to the nearest 0.1 Hz. For proton decoupled  $^{13}\text{C}$  NMR spectra, chemical shifts ( $\delta$ ) are quoted in parts per million (ppm) downfield of tetramethylsilane, using deuterated solvent as internal standard ( $\text{CDCl}_3$  at 77.16 ppm,  $\text{d}_6$ -acetone at 29.92 ppm). Assignments were made using DEPT or PENDANT pulse sequences. For proton-decoupled  $^{19}\text{F}$  NMR spectra, chemical shifts ( $\delta$ ) are quoted in parts per million (ppm) downfield of  $\text{CFCl}_3$ , using residual protonated solvent as internal standard ( $\text{CFCl}_3$  at 376.38 MHz with respect to tetramethylsilane at 400.00 MHz). Low resolution mass spectra were recorded using electrospray ionization (ESI) techniques on an Agilent 6130R instrument. High resolution mass spectra were recorded using electrospray ionization (ESI) techniques on a Bruker Maxis instrument

## Reaction Optimization

### Optimization of hindered base for boron-Wittig

| Entry | Hindered Base      | Conversion (%)*      | E/Z ratio |
|-------|--------------------|----------------------|-----------|
| 1     | LDA                | 65 (45% E- & 20% Z-) | 2.3:1     |
| 2     | LiHMDS             | Trace                | -         |
| 3     | LiTMP              | 95 (E-)              | >19:1     |
| 4     | <sup>t</sup> BuOLi | 0                    | -         |

Key to successful deprotonation is the use of a strong, sterically hindered base. LiTMP shows high basicity and fast deprotonation kinetics at 0 °C. LDA has similar basicity but is less sterically hindered and likely gives some competing attack at boron. The reason for the lower E/Z selectivity using LDA is not clear. LiHMDS is less basic than LiTMP ( $pK_a$  26 vs. 36) so is not sufficiently basic to deprotonate  $\alpha$ - to boron. This leads to an estimate of the  $pK_a$  of geminal bis(boron) compounds to be between 26 and 36. <sup>t</sup>BuOLi gives exclusive attack at boron rather than deprotonation.

## Optimization of oxidizing agent

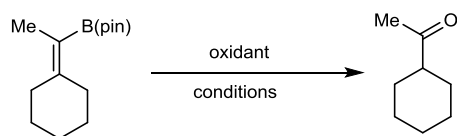

| Oxidant           | Equiv. | Solvent                         | Temp | % Vinyl boronate | % Ketone | Notes                                   |
|-------------------|--------|---------------------------------|------|------------------|----------|-----------------------------------------|
| Oxone             | 1.0    | Acetone / H <sub>2</sub> O, 2:3 | 25   | trace            | trace    | Significant decomp.                     |
| Oxone             | 2.0    | Acetone / H <sub>2</sub> O, 1:3 | 25   | 66               | 34       | Significant decomp.                     |
| Oxone             | 4.0    | Acetone / H <sub>2</sub> O, 1:6 | 25   | trace            | trace    | Significant decomp.                     |
| Oxone             | 4.0    | Acetone / H <sub>2</sub> O, 1:3 | 25   | 73               | 27       | Significant decomp.                     |
| Oxone             | 2.0    | Acetone / H <sub>2</sub> O, 1:3 | 50   | 86               | 14       | Significant decomp.                     |
| NaBO <sub>3</sub> | 2.0    | Acetone / H <sub>2</sub> O, 1:3 | 25   | trace            | >95      | Little decomp.                          |
| NaBO <sub>3</sub> | 1.2    | Acetone / H <sub>2</sub> O, 3:4 | 25   | 0                | 100      | No decomp.                              |
| NaBO <sub>3</sub> | 1.2    | THF / H <sub>2</sub> O, 3:4     | 25   | 12               | 88       | Little decomp.                          |
| NaBO <sub>3</sub> | 1.2    | Dioxane / H <sub>2</sub> O, 3:4 | 25   | 78               | 22       | Prod. volatility on solvent evaporation |
| NaBO <sub>3</sub> | 1.2    | MeCN / H <sub>2</sub> O, 3:4    | 25   | trace            | trace    | Prod. volatility on solvent evaporation |
| NaBO <sub>3</sub> | 1.2    | DCM / H <sub>2</sub> O, 3:4     | 25   | 100              | 0        | Oxidant immiscibility                   |
| NaBO <sub>3</sub> | 1.2    | iPrOH / H <sub>2</sub> O, 3:4   | 25   | 30               | 70       | Little decomp.                          |

Key to successful oxidation of this tetrasubstituted vinyl-boronate was the use of sodium perborate as oxidant rather than oxone, which gave poorer conversions and often significant decomposition. The use of acetone as solvent gave good mixing of oxidant and substrate and therefore clean oxidation to high conversion.

These conditions also proved very applicable to the oxidation of a trisubstituted vinyl-boronate.

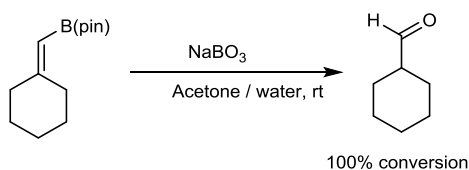

The use of aryl-substituted vinyl boronates derived from boron-Wittig reaction of aromatic aldehydes gave much more significant by-products. Here the use of  $\text{NaBO}_3$  as oxidant was inappropriate due to aldol side-reactions of the more acidic benzylic aldehyde products under the basic reaction conditions.

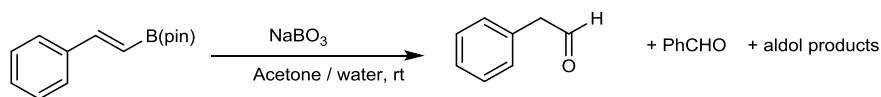

Feb22-2016  
 Chemist Tom Stephens  
 STTH 72  
 PROTON.w CDCl3 /opt/topspin TS 45

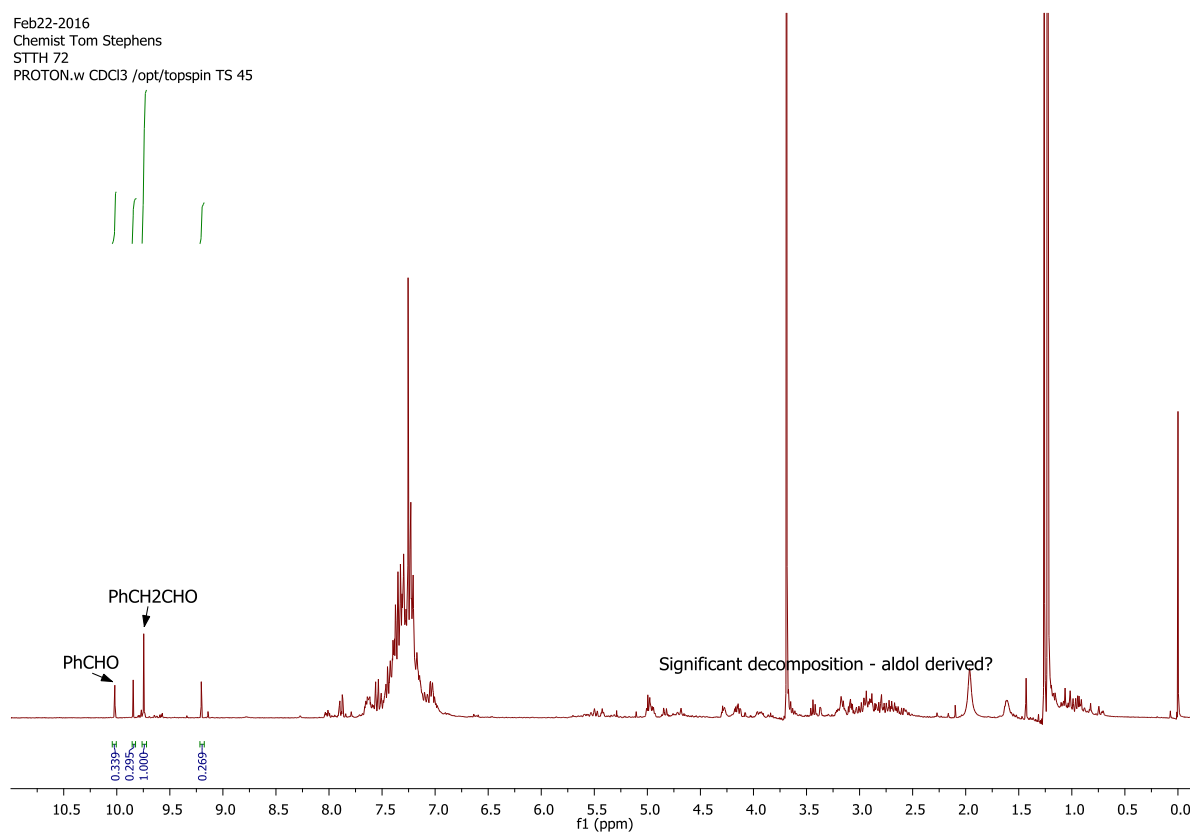

Acidic conditions were therefore required for successful oxidation to prevent aldol side-processes. However, these substrates also proved susceptible to C-C bond-cleavage processes and over oxidation.

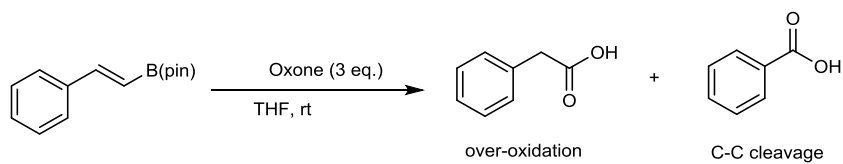

Feb22-2016  
Chemist Tom Stephens  
STTH 73  
PROTON.w CDCl3 /opt/topspin TS 46

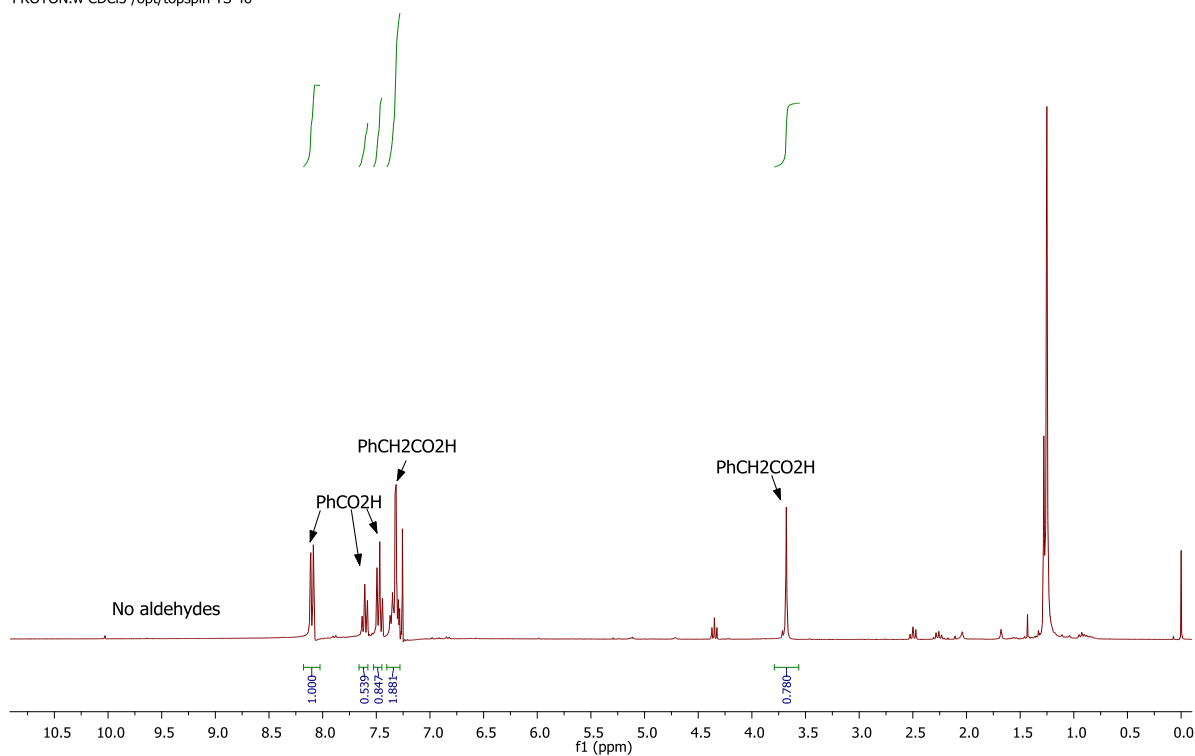

Cleanest oxidation of these substrates that give benzylic aldehydes on oxidation was achieved using 1 equivalent of oxone in acetone / water (3:4).

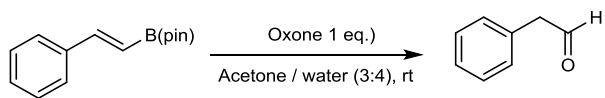

Feb22-2016  
 Chemist Tom Stephens  
 STTH 77  
 PROTON.w CDCl3 /opt/topspin TS 50

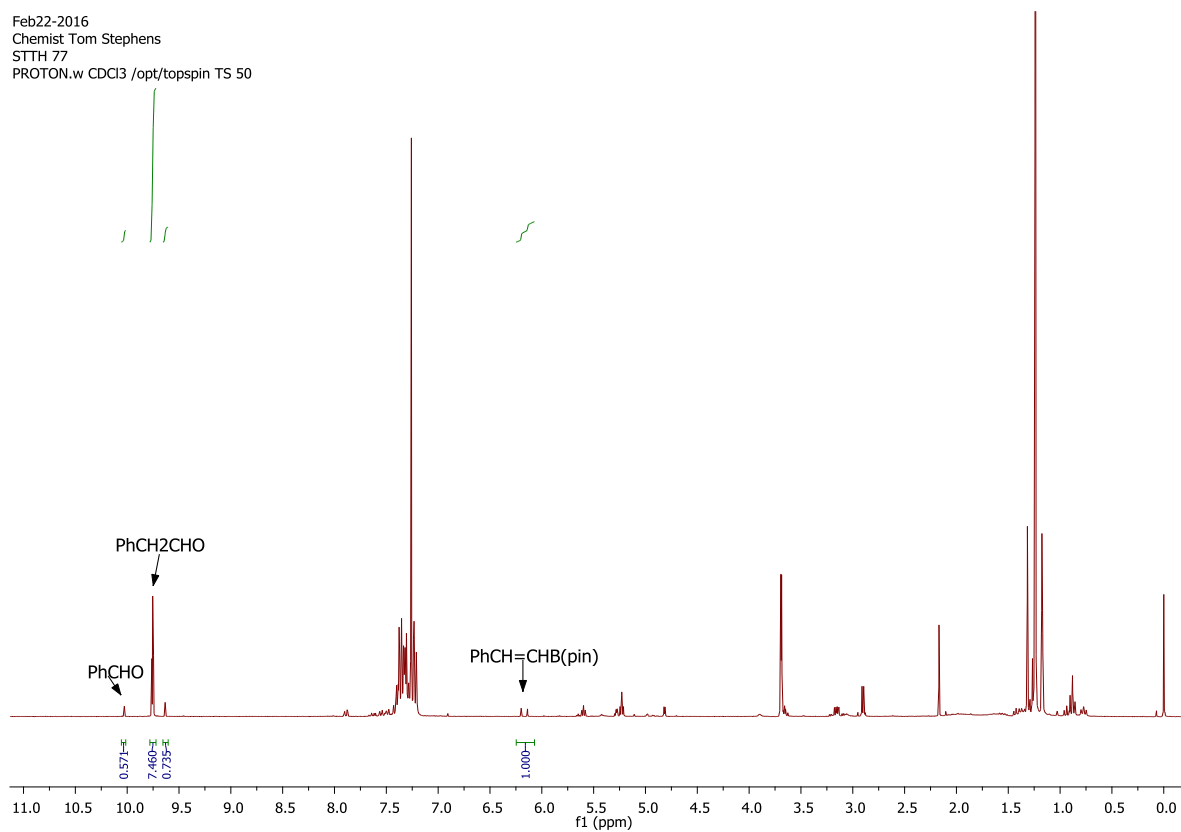

## Preparation of geminal bis(boron) compounds

The following geminal bis(boron) compounds were prepared by literature methods. NMR and mass spectral data was in full agreement with the literature.

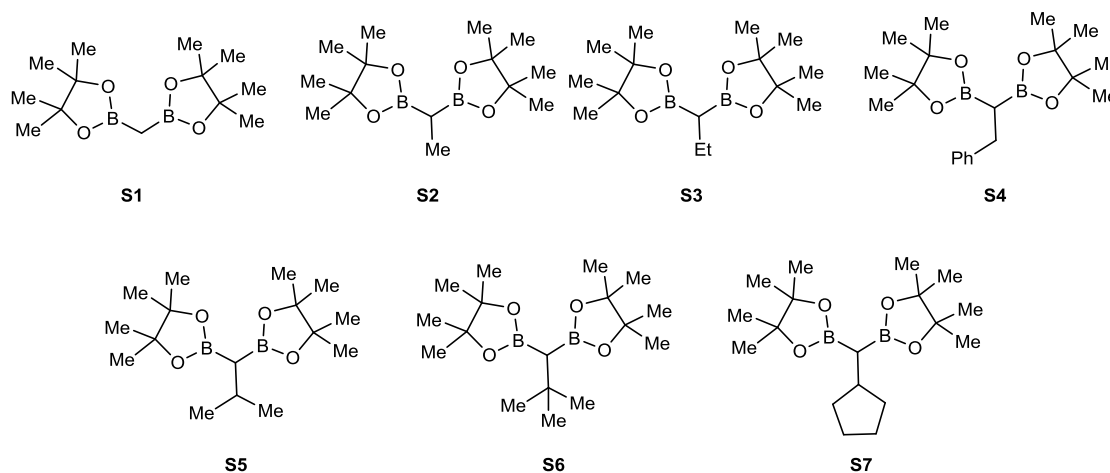

## 2,2'-(2-(2-bromophenyl)ethane-1,1-diyl)bis(4,4,5,5-tetramethyl-1,3,2-dioxaborolane) – S8

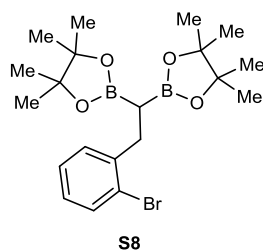

A solution of LiTMP was prepared by the addition of *n*BuLi (1.32 mL, 2.5 M in hexanes, 3.3 mmol) to 2,2,6,6-tetramethylpiperidine (0.565 mL, 3.3 mmol) in THF (5 mL) at -78 °C. A solution of bis(4,4,5,5-tetramethyl-1,3,2-dioxaborolan-2-yl)methane **S1** in THF (1 mL) was added slowly to the LiTMP solution and stirred for 1 h. After this period a solution of 2-bromobenzyl bromide (0.750 g, 3.0 mmol) in THF (2 mL) was added to the mixture, which was stirred at -78 °C for 2 h before warming to room temperature. The solution was diluted with diethyl ether (10 mL) and water (5 mL) and the organic layer separated. The aqueous layer was extracted with further portions of diethyl ether (3 x 10 mL) and the combined organic extracts were dried (MgSO<sub>4</sub>), filtered and evaporated. The crude material was purified by flash column chromatography on silica (EtOAc / hexanes, 10%) to give the title compound as a white solid;  $\delta_{\text{H}}$  (500 MHz, CDCl<sub>3</sub>) 7.41 (1H, dd,  $J$  = 7.9, 0.8 Hz, ArH), 7.28 (1H, dd,  $J$  = 7.5, 1.4 Hz, ArH), 7.10 (1H, td,  $J$  = 7.5, 0.8 Hz, ArH), 6.93 (1H, td,  $J$  = 7.9, 1.4 Hz, ArH), 2.91 (2H, d,  $J$  = 7.9 Hz, ArCH<sub>2</sub>), 1.23 (1H, t,  $J$  = 7.9 Hz, CH(Bpin)<sub>2</sub>), 1.13 (12H, s, 4 x CH<sub>3</sub>), 1.13 (12H, s, 4 x CH<sub>3</sub>);  $\delta_{\text{C}}$  (125 MHz, CDCl<sub>3</sub>) 143.5 (C), 132.5 (CH), 130.3 (CH), 127.1 (CH), 126.9 (CH), 124.6 (C), 83.2 (C), 31.7 (CH<sub>2</sub>), 24.8 (CH<sub>3</sub>), 24.5 (CH<sub>3</sub>) (carbon adjacent to boron not visible); HRMS (ES<sup>+</sup>) Exact mass calculated for C<sub>20</sub>H<sub>31</sub><sup>11</sup>B<sub>2</sub><sup>79</sup>BrO<sub>4</sub> [M+Na]<sup>+</sup>: 458.1522, found: 458.1526.



## General Procedure for homologative cross-coupling

2,2,6,6-tetramethylpiperidine (1.2 equiv.) was dissolved in THF (0.6M) and cooled to 0 °C under dry nitrogen. *n*-Butyllithium solution (2.50 M, 1.2 equiv.) was added dropwise and the solution stirred for 10 minutes. A solution of geminal bis(boron) compound (1.2 equiv.) in THF (1.2 M) was prepared and added dropwise to the LiTMP solution at 0 °C. After stirring for 15 minutes the solution was cooled to -78 °C before the dropwise addition of a solution of aldehyde or ketone (1 equiv.) in THF (1.0 M). After an hour at this temperature, the solution was warmed to 0 °C and stirred for a further 2 hours. The solvent was evaporated under vacuum and replaced with acetone (4.4 mL per mmol of starting carbonyl compound). The solution was cooled to 0 °C and an aqueous solution of sodium perborate (1.5 equiv., 0.9 M) was added dropwise. The solution was stirred at 0 °C for 1 hour. Generally after this period the reaction was complete, however certain cases required the addition of further 0.5 equiv. portions of sodium perborate solution. When fully oxidized, water (5 mL) was added and the mixture extracted with diethyl ether (3 × 5 mL). The combined extracts were dried (MgSO<sub>4</sub>), filtered and evaporated to yield crude product. The products were purified by flash column chromatography (Et<sub>2</sub>O / pentane).

## Cyclohexanecarbaldehyde - 1a

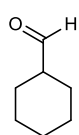

The title compound was prepared from 2,2,6,6-tetramethylpiperidine (0.570 mL, 3.3 mmol), *n*-butyllithium (1.32 mL, 2.5 M in hexanes, 3.3 mmol) and bis(4,4,5,5-tetramethyl-1,3,2-dioxaborolan-2-yl)methane (0.890 g, 3.3 mmol) and cyclohexanone (0.310 mL, 3.0 mmol) in THF (12 mL), followed by oxidation by sodium perborate (0.690 g, 4.5 mmol) in water (9.9 mL) and acetone (13.2 mL). The compound was purified by column chromatography using Et<sub>2</sub>O / pentane (5%) as eluent to yield the title compound as a colourless oil (0.240 g, 71%).  $\delta_H$  (300 MHz, CDCl<sub>3</sub>) 9.61 (1H, s, CHO), 2.29 – 2.17 (1H, m, CHCHO), 1.96– 1.82 (2H, m), 1.80 – 1.69 (2H, m), 1.69 – 1.58 (1H, m), 1.45 – 1.17 (5H, m). This data is in agreement with the literature.<sup>1</sup>

<sup>1</sup> M. Kiriara, T. Noguchi, N. Okajima, S. Naito, Y. Ishizuka, A. Harano, H. Tsukiji, R. Takizawa, *Tetrahedron* **2012**, *68*, 1515.

### 5,9-dimethyl-1-phenyldec-8-en-2-one - 2a

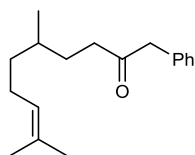

The title compound was prepared from 2,2,6,6-tetramethylpiperidine (0.101 mL, 0.6 mmol), *n*-butyllithium (0.240 mL, 2.5 M in hexanes, 0.6 mmol) and 2,2'-(2-phenylethane-1,1-diyl)bis(4,4,5,5-tetramethyl-1,3,2-dioxaborolane) (215 mg, 0.6 mmol) and citronellal (91.0  $\mu$ L, 0.5 mmol) in THF (2 mL), followed by oxidation by sodium perborate (115 mg, 0.75 mmol) in water (1.65 mL) and acetone (2.0 mL). The compound was purified by column chromatography using Et<sub>2</sub>O / pentane (10%) as eluent to yield the title compound as a colourless oil (84 mg, 65%).  $\nu_{\text{max}}$  (neat): 2969 (CH), 2927 (CH), 1710 (C=O), 1496, 1378, 1271, 1086, 1047, 879, 699  $\text{cm}^{-1}$ ;  $\delta_{\text{H}}$  (400 MHz, CDCl<sub>3</sub>) 7.35 – 7.30 (2H, m, ArH), 7.28 – 7.23 (1H, m, ArH), 7.20 (2H, d,  $J$  = 7.0 Hz, ArH), 5.05 (1H, tt,  $J$  = 7.0, 1.3 Hz, C=CH), 3.68 (2H, s, PhCH<sub>2</sub>), 2.52 – 2.36 (2H, m), 2.01 – 1.84 (2H, m), 1.67 (3H, s, =CCH<sub>3</sub>), 1.58 (3H, s, =CCH<sub>3</sub>), 1.42 – 1.20 (4H, m), 1.16 – 1.05 (1H, m, CHCH<sub>3</sub>), 0.82 (3H, d,  $J$  = 6.2 Hz, CHCH<sub>3</sub>);  $\delta_{\text{C}}$  (100 MHz, CDCl<sub>3</sub>) 208.8 (C=O), 134.4 (C), 131.2 (C), 129.4 (2  $\times$  CH), 128.7 (2  $\times$  CH), 126.9 (CH), 124.6 (CH), 50.1 (CH<sub>2</sub>), 39.7 (CH<sub>2</sub>), 36.8 (CH<sub>2</sub>), 32.0 (CH), 30.6 (CH<sub>2</sub>), 25.7 (CH<sub>3</sub>), 25.4 (CH<sub>2</sub>), 19.2 (CH<sub>3</sub>), 17.6 (CH<sub>3</sub>); HRMS (ES<sup>+</sup>): Exact mass calculated for C<sub>18</sub>H<sub>26</sub>O [M+Na]<sup>+</sup>: 281.1876, found: 281.1874.

### 6-(benzo[d][1,3]dioxol-5-yl)-5-methylhexan-3-one - 2b

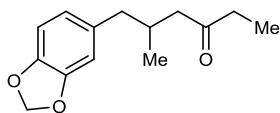

The title compound was prepared from 2,2,6,6-tetramethylpiperidine (0.101 mL, 0.6 mmol), *n*-butyllithium (0.240 mL, 2.5 M in hexanes, 0.6 mmol) and 2,2'-(propane-1,1-diyl)bis(4,4,5,5-tetramethyl-1,3,2-dioxaborolane) (178 mg, 0.6 mmol) and 2-methyl-3-(3,4-methylenedioxyphenyl)-propanal (83.0  $\mu$ L, 0.5 mmol) in THF (2 mL), followed by oxidation by sodium perborate (115 mg, 0.75 mmol) in water (1.65 mL) and acetone (2.0 mL). The compound was purified by column chromatography using EtOAc / hexane (5%) as eluent to yield the title compound as a colourless oil (68 mg, 58%).  $\nu_{\text{max}}$  (neat): 2959 (CH), 2929 (CH), 1709 (C=O), 1503, 1488, 1440, 1243, 1188, 1036, 925, 806  $\text{cm}^{-1}$ ;  $\delta_{\text{H}}$  (400 MHz, CDCl<sub>3</sub>) 6.71 (1H, d,  $J$  = 7.9 Hz, ArH), 6.65 (1H, d,  $J$  = 1.5 Hz, ArH), 6.58 (1H, dd,  $J$  = 7.9, 1.5 Hz, ArH), 5.91 (2H, s, OCH<sub>2</sub>O), 2.48 (1H, dd,  $J$  = 13.3, 6.6 Hz, O=CCH<sub>2</sub>CHMe), 2.42 – 2.32 (4H, m, O=CCH<sub>2</sub>CHMe and O=CCH<sub>2</sub>CH<sub>3</sub> and ArCH<sub>2</sub>), 2.30 – 2.17 (2H, m, ArCH<sub>2</sub> and CH<sub>3</sub>CH), 1.02 (3H, t,  $J$  = 7.2 Hz, CH<sub>2</sub>CH<sub>3</sub>), 0.88 (3H, d,  $J$  = 6.3 Hz, CH<sub>2</sub>CH<sub>3</sub>);  $\delta_{\text{C}}$  (100 MHz, CDCl<sub>3</sub>) 211.2 (C=O), 147.4 (C), 145.6 (C), 134.2 (C), 121.9 (CH), 109.4 (CH), 107.9 (CH), 100.7 (CH<sub>2</sub>), 48.7 (CH<sub>2</sub>), 42.8 (CH<sub>2</sub>), 36.4 (CH<sub>2</sub>), 31.2 (CH), 19.6 (CH<sub>3</sub>), 7.6 (CH<sub>3</sub>); HRMS (ES<sup>+</sup>): Exact mass calculated for C<sub>14</sub>H<sub>18</sub>O<sub>3</sub> [M+Na]<sup>+</sup>: 257.1148, found: 257.1146.

### 5-(5-methylfuran-2-yl)hexan-2-one - 2c

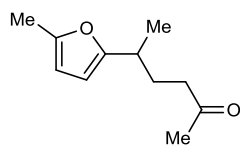

The title compound was prepared from 2,2,6,6-tetramethylpiperidine (0.101 mL, 0.6 mmol), *n*-butyllithium (0.240 mL, 2.5 M in hexanes, 0.6 mmol) and 2,2'-(ethane-1,1-diyl)bis(4,4,5,5-tetramethyl-1,3,2-dioxaborolane) (169 mg, 0.6 mmol) and 3-(5-Methyl-2-furyl)butyraldehyde (75.0  $\mu$ L, 0.5 mmol) in THF (2 mL), followed by oxidation by sodium perborate (115 mg, 0.75 mmol) in water (1.65 mL) and acetone (2.0 mL). The compound was purified by column chromatography using EtOAc / hexane (10%) as eluent to yield the title compound as a colourless oil (63 mg, 70%).  $\nu_{\max}$  (neat): 2971 (CH), 2930 (CH), 1709 (C=O), 1359, 1165, 1085, 1047  $\text{cm}^{-1}$ ;  $\delta_{\text{H}}$  (400 MHz,  $\text{CDCl}_3$ ) 5.83 (2H, s, ArH), 2.27 (1H, sextet,  $J = 6.9$  Hz, CHCH<sub>3</sub>), 2.40 (2H, dd,  $J = 7.4, 8.7$  Hz, CH<sub>2</sub>C=O), 2.24 (3H, s, CH<sub>3</sub>), 2.10 (3H, s, CH<sub>3</sub>), 1.89 – 1.78 (2H, m, CHCH<sub>2</sub>), 1.21 (3H, d,  $J = 6.9$  Hz, CHCH<sub>3</sub>);  $\delta_{\text{C}}$  (100 MHz,  $\text{CDCl}_3$ ) 208.8 (C=O), 157.6 (C), 150.3 (C), 105.6 (CH), 104.6 (CH), 41.3 (CH<sub>2</sub>), 32.5 (CH<sub>3</sub>), 29.9 (CH), 29.6 (CH<sub>2</sub>), 19.2 (CH<sub>3</sub>), 13.5 (CH<sub>3</sub>); HRMS ( $\text{ES}^+$ ): Exact mass calculated for  $\text{C}_{11}\text{H}_{16}\text{O}_2$   $[\text{M}+\text{Na}]^+$ : 203.1043, found: 204.1043.

### 1-(2-bromophenyl)-4-phenylbutan-2-one - 2d

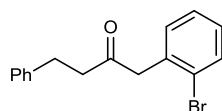

The title compound was prepared from 2,2,6,6-tetramethylpiperidine (0.101 mL, 0.6 mmol), *n*-butyllithium (0.240 mL, 2.5 M in hexanes, 0.6 mmol) and 2,2'-(2-(2-bromophenyl)ethane-1,1-diyl)bis(4,4,5,5-tetramethyl-1,3,2-dioxaborolane) (262 mg, 0.6 mmol) and phenylacetaldehyde (66.0  $\mu$ L, 0.5 mmol) in THF (2 mL), followed by oxidation by sodium perborate (115 mg, 0.75 mmol) in water (1.65 mL) and acetone (2.0 mL). The compound was purified by column chromatography using EtOAc / hexane (5%) as eluent to yield the title compound as a colourless oil (92 mg, 61%).  $\nu_{\max}$  (neat): 3022 (CH), 2953 (CH), 2926 (CH), 1705 (C=O), 1439, 1409, 1359, 1321, 1134, 1023, 1014, 755, 699  $\text{cm}^{-1}$ ;  $\delta_{\text{H}}$  (400 MHz,  $\text{CDCl}_3$ ) 7.56 (1H, dd,  $J = 8.0, 0.8$  Hz, ArH), 7.30 – 7.23 (3H, m, ArH), 7.21 – 7.10 (5H, m, ArH), 3.83 (2H, s, O=CCH<sub>2</sub>Ar), 2.95 – 2.89 (2H, m), 2.85 – 2.79 (2H, m);  $\delta_{\text{C}}$  (100 MHz,  $\text{CDCl}_3$ ) 206.0 (C=O), 140.9 (C), 134.6 (C), 132.8 (CH), 131.7 (CH), 128.8 (CH), 128.5 (2  $\times$  CH), 128.4 (2  $\times$  CH), 127.6 (CH), 126.1 (CH), 125.0 (C), 50.2 (CH<sub>2</sub>), 44.0 (CH<sub>2</sub>), 29.7 (CH<sub>2</sub>); HRMS ( $\text{ES}^+$ ): Exact mass calculated for  $\text{C}_{16}\text{H}_{15}\text{O}^{79}\text{Br}$   $[\text{M}+\text{Na}]^+$ : 325.0198, found: 325.0197.

### 1-(4-bromophenyl)-3-methylbutan-2-one - 2e

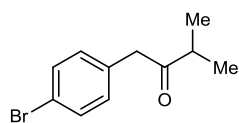

The title compound was prepared from 2,2,6,6-tetramethylpiperidine (0.101 mL, 0.6 mmol), *n*-butyllithium (0.240 mL, 2.5 M in hexanes, 0.6 mmol) and 2,2'-(2-methylpropane-1,1-diyl)bis(4,4,5,5-tetramethyl-1,3,2-dioxaborolane) (186 mg, 0.6 mmol) and 4-bromobenzaldehyde (93.0 mg, 0.5 mmol) in THF (2 mL), followed by oxidation by sodium perborate (115 mg, 0.75 mmol) in water (1.65 mL) and acetone (2.0 mL). The compound was purified by column chromatography using Et<sub>2</sub>O / hexane (5%) as eluent to yield the title compound as a white solid (73 mg, 60%). m.p. 65 – 67 °C;  $\nu_{\max}$  (neat): 2968, 2933, 2871, 1704 (C=O), 1486, 1465, 1450, 1321, 1068, 1041, 1007, 788 cm<sup>-1</sup>;  $\delta_{\text{H}}$  (400 MHz, CDCl<sub>3</sub>) 7.44 (2H, d,  $J$  = 8.3 Hz, ArH), 7.07 (2H, d,  $J$  = 8.3 Hz, ArH), 3.70 (2H, s, ArCH<sub>2</sub>), 2.71 (1H, septet,  $J$  = 6.9 Hz, CH(CH<sub>3</sub>)<sub>2</sub>), 1.11 (6H, d,  $J$  = 6.9 Hz, CH(CH<sub>3</sub>)<sub>2</sub>);  $\delta_{\text{C}}$  (100 MHz, CDCl<sub>3</sub>) 211.2 (C=O), 133.3 (C), 131.7 (2 × CH), 131.2 (2 × CH), 120.9 (C), 46.7 (CH<sub>2</sub>), 40.4 (CH), 18.2 (2 × CH<sub>3</sub>); HRMS (ES<sup>+</sup>): Exact mass calculated for C<sub>11</sub>H<sub>13</sub>O<sup>79</sup>Br [M+Na]<sup>+</sup>: 263.0042, found: 263.0044.

### 1-(4-methoxyphenyl)-3,3-dimethylbutan-2-one - 2f

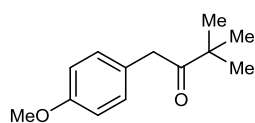

The title compound was prepared from 2,2,6,6-tetramethylpiperidine (0.101 mL, 0.6 mmol), *n*-butyllithium (0.240 mL, 2.5 M in hexanes, 0.6 mmol) and 2,2'-(2,2-dimethylpropane-1,1-diyl)bis(4,4,5,5-tetramethyl-1,3,2-dioxaborolane) (177 mg, 0.55 mmol) and 4-methoxybenzaldehyde (55.0  $\mu$ L, 0.46 mmol) in THF (2 mL), followed by oxidation by sodium perborate (115 mg, 0.75 mmol) in water (1.65 mL) and acetone (2.0 mL). A second portion of sodium perborate (57.5 mg, 0.375 mmol) in water (0.8 mL) and acetone (1.0 mL) was added after 2 hours. The compound was purified by column chromatography using EtOAc / hexane (5%) as eluent to yield the title compound as a colourless oil (38 mg, 40%).  $\nu_{\max}$  (neat): 2967 (CH), 1707 (C=O), 1612, 1511, 1464, 1245, 1177, 1033, 1007 cm<sup>-1</sup>;  $\delta_{\text{H}}$  (400 MHz, CDCl<sub>3</sub>) 7.10 (2H, d,  $J$  = 8.5 Hz, ArH), 6.86 (2H, d,  $J$  = 8.5 Hz, ArH), 3.80 (3H, s, OCH<sub>3</sub>), 3.75 (2H, s, ArCH<sub>2</sub>), 1.20 (9H, s, C(CH<sub>3</sub>)<sub>3</sub>);  $\delta_{\text{C}}$  (100 MHz, CDCl<sub>3</sub>) 213.1 (C=O), 158.2 (C), 130.3 (2 × CH), 126.8 (C), 113.7 (2 × CH), 55.1 (CH<sub>3</sub>), 44.4 (C), 42.2 (CH<sub>2</sub>), 26.3 (3 × CH<sub>3</sub>); HRMS (ES<sup>+</sup>): Exact mass calculated for C<sub>13</sub>H<sub>18</sub>O<sub>2</sub> [M+Na]<sup>+</sup>: 229.1199, found: 229.1201.

### 2-methyl-6-phenylhexan-3-one - 2g

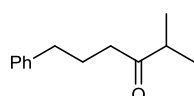

The title compound was prepared from 2,2,6,6-tetramethylpiperidine (0.570 mL, 3.3 mmol), *n*-butyllithium (1.32 mL, 2.5 M in hexanes, 3.3 mmol) and 2,2'-(2-

methylpropane-1,1-diyl)bis(4,4,5,5-tetramethyl-1,3,2-dioxaborolane) (1.02 g, 3.3 mmol) and hydrocinnamaldehyde (0.400 mL, 3.0 mmol) in THF (12 mL), followed by oxidation by sodium perborate (0.690 g, 4.5 mmol) in water (9.9 mL) and acetone (13.2 mL). The compound was purified by column chromatography using EtOAc / hexane (5%) as eluent to yield the title compound as a colourless oil (0.410 g, 71%).  $\delta_{\text{H}}$  (400 MHz,  $\text{CDCl}_3$ ) 7.30 – 7.24 (2H, m, ArH), 7.21 – 7.15 (3H, m, ArH), 2.61 (2H, t,  $J = 7.4$  Hz, ArCH<sub>2</sub>), 2.56 (1H, septet,  $J = 7.0$  Hz, CH(CH<sub>3</sub>)<sub>2</sub>), 2.45 (2H, t,  $J = 7.4$  Hz, O=CCH<sub>2</sub>), 1.90 (2H, pent,  $J = 7.4$  Hz, ArCH<sub>2</sub>CH<sub>2</sub>), 1.07 (6H, d,  $J = 7.0$  Hz, CH(CH<sub>3</sub>)<sub>2</sub>);  $\delta_{\text{C}}$  (100 MHz,  $\text{CDCl}_3$ ) 214.5 (C=O), 141.7 (C), 128.4 (2 × CH), 128.3 (2 × CH), 125.8 (CH), 40.8 (CH), 39.4 (CH<sub>2</sub>), 35.1 (CH<sub>2</sub>), 25.1 (CH<sub>2</sub>), 18.2 (2 × CH<sub>3</sub>); HRMS ( $\text{ES}^+$ ): Exact mass calculated for  $\text{C}_{13}\text{H}_{18}\text{O}$  [ $\text{M}+\text{Na}$ ]<sup>+</sup>: 213.1250, found: 213.1250.

### 1-phenyl-3-(3-(trifluoromethyl)phenyl)butan-2-one - 2h

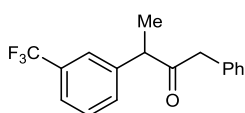

The title compound was prepared from 2,2,6,6-tetramethylpiperidine (0.101 mL, 0.6 mmol), *n*-butyllithium (0.240 mL, 2.5 M in hexanes, 0.6 mmol) and 2,2'-(2-phenylethane-1,1-diyl)bis(4,4,5,5-tetramethyl-1,3,2-dioxaborolane) (215 mg, 0.6 mmol) and 3'-trifluoromethylacetophenone (76.0  $\mu\text{L}$ , 0.5 mmol) in THF (2 mL), followed by oxidation by sodium perborate (115 mg, 0.75 mmol) in water (1.65 mL) and acetone (2.0 mL). The compound was purified by column chromatography using EtOAc / hexane (5%) as eluent to yield the title compound as a colourless oil (83 mg, 58%).  $\nu_{\text{max}}$  (neat): 2941 (CH), 1710 (C=O), 1453, 1327, 1164, 1120, 1073, 699  $\text{cm}^{-1}$ ;  $\delta_{\text{H}}$  (400 MHz,  $\text{CDCl}_3$ ) 7.52 (1H, d,  $J = 7.8$  Hz, ArH), 7.79 (1H, t,  $J = 7.8$  Hz, ArH), 7.40 – 7.30 (2H, m, ArH), 7.30 – 7.21 (3H, m, ArH), 7.04 (2H, d,  $J = 6.5$  Hz, ArH), 3.93 (1H, q,  $J = 7.0$  Hz, CHCH<sub>3</sub>), 3.66 (1H, d,  $J = 15.3$  Hz, CH<sub>2</sub>Ph), 3.62 (1H, d,  $J = 15.3$  Hz, CH<sub>2</sub>Ph), 1.39 (3H, d,  $J = 7.0$  Hz, CHCH<sub>3</sub>);  $\delta_{\text{C}}$  (100 MHz,  $\text{CDCl}_3$ ) 207.3 (C=O), 141.2 (C), 133.8 (C), 131.3 (CH), 131.2 (q,  $J = 32$  Hz, C), 129.39 (2 × CH), 129.36 (2 × CH), 128.7 (CH), 127.1 (CH), 124.9 (q,  $J = 3.8$  Hz, CH), 124.1 (q,  $J = 3.7$  Hz, CH), 123.9 (q,  $J = 272$  Hz, CF<sub>3</sub>), 51.5 (CH), 48.5 (CH<sub>2</sub>), 17.9 (CH<sub>3</sub>);  $\delta_{\text{F}}$  (282 MHz,  $\text{CDCl}_3$ ) -62.6 (3F, s); HRMS ( $\text{ES}^+$ ): Exact mass calculated for  $\text{C}_{17}\text{H}_{15}\text{OF}_3$  [ $\text{M}+\text{Na}$ ]<sup>+</sup>: 315.0967, found: 315.0966.

### 1-(*o*-tolyl)propan-2-one - 2i

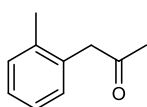

The title compound was prepared from 2,2,6,6-tetramethylpiperidine (0.101 mL, 0.6 mmol), *n*-butyllithium (0.240 mL, 2.5 M in hexanes, 0.6 mmol) and 2,2'-(ethane-1,1-diyl)bis(4,4,5,5-tetramethyl-1,3,2-dioxaborolane) (169 mg, 0.6 mmol) and *o*-tolylaldehyde (59.0  $\mu\text{L}$ , 0.5 mmol) in THF (2 mL), followed by oxidation by sodium perborate (115 mg, 0.75 mmol) in water (1.65 mL) and acetone (2.0 mL). The compound was purified by column

chromatography using EtOAc / hexane (10%) as eluent to yield the title compound as a colourless oil (72 mg, 97%).  $\delta_{\text{H}}$  (400 MHz,  $\text{CDCl}_3$ ) 7.21 – 7.12 (4H, m, ArH), 3.72 (2H, s, ArCH<sub>2</sub>), 2.26 (3H, s, ArCH<sub>3</sub>), 2.15 (3H, s, O=CCH<sub>3</sub>);  $\delta_{\text{C}}$  (100 MHz,  $\text{CDCl}_3$ ) 206.3 (C=O), 136.8 (C), 133.1 (C), 130.4 (CH), 130.3 (CH), 127.3 (CH), 126.2 (CH), 49.1 (CH<sub>2</sub>), 29.2 (CH<sub>3</sub>), 19.5 (CH<sub>3</sub>);  $m/z$  (ES<sup>+</sup>) 171 [M+Na]<sup>+</sup>. Data in agreement with the literature<sup>2</sup>

## 2-(2-bromophenyl)-1-((1R,2S,5R)-2-isopropyl-5-methylcyclohexyl)ethan-1-one - 2j

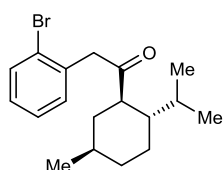

The title compound was prepared from 2,2,6,6-tetramethylpiperidine (0.101 mL, 0.6 mmol), *n*-butyllithium (0.240 mL, 2.5 M in hexanes, 0.6 mmol) and 2,2'-(ethane-1,1-diyl)bis(4,4,5,5-tetramethyl-1,3,2-dioxaborolane) (169 mg, 0.6 mmol) and (L)-menthone (86.0  $\mu\text{L}$ , 0.5 mmol) in THF (2 mL), followed by oxidation by sodium perborate (115 mg, 0.75 mmol) in water (1.65 mL) and acetone (2.0 mL). A second portion of sodium perborate (57.5 mg, 0.375 mmol) in water (0.8 mL) and acetone (1.0 mL) was added after 2 hours. The compound was purified by column chromatography using EtOAc / hexane (10%) as eluent to yield the title compound as a white solid (98 mg, 58%).  $\nu_{\text{max}}$  (neat): 2950 (CH), 2921 (CH), 1705 (C=O), 1470, 1441, 1368, 1306, 1050, 1025, 743  $\text{cm}^{-1}$ ;  $\delta_{\text{H}}$  (400 MHz,  $\text{CDCl}_3$ ) 7.55 (1H, d,  $J$  = 8.0 Hz, ArH), 7.27 – 7.24 (1H, m, ArH), 7.20 – 7.16 (1H, m, ArH), 7.11 (1H, td,  $J$  = 7.5, 1.8 Hz, ArH), 4.01 (1H, d,  $J$  = 16.8 Hz, ArCH<sub>2</sub>), 3.86 (1H, d,  $J$  = 16.8 Hz, ArCH<sub>2</sub>), 3.19 – 3.14 (1H, m, O=CCH), 2.09 (1H, dq,  $J$  = 13.6, 2.4 Hz), 1.88 – 1.55 (5H, m), 1.55 – 1.38 (1H, m), 1.31 – 1.21 (1H, m), 0.87 (3H, d,  $J$  = 7.8 Hz, CH<sub>3</sub>), 0.85 (3H, d,  $J$  = 7.6 Hz, CH<sub>3</sub>), 0.81 (3H, d,  $J$  = 6.7 Hz, CH<sub>3</sub>);  $\delta_{\text{C}}$  (100 MHz,  $\text{CDCl}_3$ ) 209.0 (C=O), 134.8 (C), 132.7 (CH), 131.9 (CH), 128.6 (CH), 127.4 (CH), 125.0 (C), 49.7 (CH<sub>2</sub>), 48.2 (CH), 47.3 (CH), 37.6 (CH<sub>2</sub>), 35.4 (CH<sub>2</sub>), 29.7 (CH), 27.5 (CH), 25.9 (CH<sub>2</sub>), 22.4 (CH<sub>3</sub>), 21.6 (CH<sub>3</sub>); HRMS (ES<sup>+</sup>): Exact mass calculated for C<sub>18</sub>H<sub>25</sub>O<sup>79</sup>Br [M+Na]<sup>+</sup>: 359.0981, found: 359.0977.

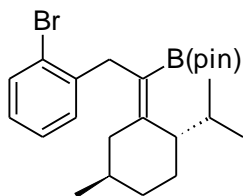

Also present was boronate **2j'**  $\delta_{\text{H}}$  (400 MHz,  $\text{CDCl}_3$ ) 7.49 (1H, dd,  $J$  = 7.9, 0.9 Hz, ArH), 7.24–7.14 (2H, m, ArH), 7.02–6.95 (1H, m, ArH), 3.64 (1H, d,  $J$  = 16.7 Hz, ArCH<sub>2</sub>), 3.54 (1H, d,  $J$  = 16.7 Hz, ArCH<sub>2</sub>), 2.62 (1H, dt,  $J$  = 10.3, 3.4 Hz), 2.27–2.19 (1H, m), 2.12–1.75 (4H, m), 1.75–1.65 (2H, m), 1.12 (6H, s, O(CH<sub>3</sub>)<sub>2</sub>), 1.11 (6H, s, O(CH<sub>3</sub>)<sub>2</sub>), 0.94 (3H, d,  $J$  = 6.5 Hz, CH<sub>3</sub>), 0.86 (3H, d,  $J$  = 7.2 Hz, CH<sub>3</sub>), 0.85 (3H, d,  $J$  = 6.7 Hz, CH<sub>3</sub>);  $\delta_{\text{C}}$  (100 MHz,  $\text{CDCl}_3$ ) 156.2 (C), 142.0 (C), 132.1 (CH), 130.3 (CH), 126.9 (CH), 126.8 (CH), 82.7 (C), 36.0 (CH<sub>2</sub>), 32.4 (CH<sub>2</sub>), 30.4 (CH), 26.89 (CH), 26.88 (CH<sub>2</sub>), 25.8 (CH), 24.7 (CH<sub>3</sub>), 24.6 (CH<sub>3</sub>), 24.5 (CH<sub>2</sub>), 21.3 (CH<sub>3</sub>), 21.2 (CH<sub>3</sub>), 18.4 (CH<sub>3</sub>).

<sup>2</sup> C. Liu, G. T. Kelly, C. M. H. Watanabe, *Org. Lett.*, **2006**, *8*, 1065.

### 1-cyclopentyl-2-(pyridin-2-yl)ethan-1-one - 2k

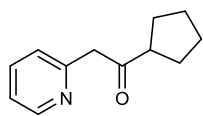

The title compound was prepared from 2,2,6,6-tetramethylpiperidine (0.101 mL, 0.6 mmol), *n*-butyllithium (0.240 mL, 2.5 M in hexanes, 0.6 mmol) and 2,2'-(cyclopentylmethylene)bis(4,4,5,5-tetramethyl-1,3,2-dioxaborolane) (202 mg, 0.6 mmol) and pyridine-2-carboxaldehyde (48.0  $\mu$ L, 0.5 mmol) in THF (2 mL), followed by oxidation by sodium perborate (115 mg, 0.75 mmol) in water (1.65 mL) and acetone (2.0 mL). The compound was purified by column chromatography using EtOAc / hexane (10%) as eluent to yield the title compound as a yellow oil (48 mg, 51%).  $\delta_{\text{H}}$  (400 MHz,  $\text{CDCl}_3$ ) 8.59 (1H, d,  $J = 4.7$  Hz, ArH), 7.61 – 7.53 (1H, m, ArH), 7.21 – 7.13 (1H, m, ArH), 7.13 – 7.07 (1H, m, ArH), 4.01 (2H, s, ArCH<sub>2</sub>), 3.08 (1H, pentet,  $J = 7.9$  Hz, O=CCH), 1.89 – 1.79 (4H, m), 1.77 – 1.53 (4H, m);  $\delta_{\text{C}}$  (100 MHz,  $\text{CDCl}_3$ ) 209.6 (C=O), 155.0 (C), 149.3 (CH), 136.5 (CH), 124.3 (CH), 121.9 (CH), 51.32 (CH), 51.26 (CH<sub>2</sub>), 28.8 (2  $\times$  CH<sub>2</sub>), 26.0 (2  $\times$  CH<sub>2</sub>); HRMS ( $\text{ES}^+$ ): Exact mass calculated for  $\text{C}_{12}\text{H}_{15}\text{NO}$  [ $\text{M}+\text{Na}$ ] $^+$ : 212.1046, found: 212.1041.

Also present was enol tautomer **2k'** in a keto:enol ratio of approx. 13:1. Diagnostic enol resonances:  $\delta_{\text{H}}$  (400 MHz,  $\text{CDCl}_3$ ) 15.0 (1H, br s, OH), 8.23 (1H, d,  $J = 5.1$  Hz, ArH), 7.57 (1H, t,  $J = 7.5$  Hz, ArH), 6.97 – 6.89 (2H, m, ArH), 5.40 (1H, s, C=CH).

### 1-(2-bromophenyl)-6-chlorohexan-2-one - 2l

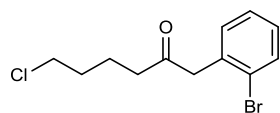

The title compound was prepared from 2,2,6,6-tetramethylpiperidine (0.101 mL, 0.6 mmol), *n*-butyllithium (0.240 mL, 2.5 M in hexanes, 0.6 mmol) and 2,2'-(2-(2-bromophenyl)ethane-1,1-diyl)bis(4,4,5,5-tetramethyl-1,3,2-dioxaborolane) (262 mg, 0.6 mmol) and 4-chlorobutanal (65.0 mg, 0.5 mmol) in THF (2 mL), followed by oxidation by sodium perborate (115 mg, 0.75 mmol) in water (1.65 mL) and acetone (2.0 mL). The compound was purified by column chromatography using EtOAc / hexane (10%) as eluent to yield the title compound as a colourless oil (85 mg, 58%).  $\nu_{\text{max}}$  (neat): 2956 (CH), 1715 (C=O), 1568, 1470, 1316, 1125, 1088, 1026, 748  $\text{cm}^{-1}$ ;  $\delta_{\text{H}}$  (400 MHz,  $\text{CDCl}_3$ ) 7.57 (1H, dd,  $J = 8.0, 1.1$  Hz, ArH), 7.29 (1H, td,  $J = 7.5, 1.1$  Hz, ArH), 7.21 (1H, dd,  $J = 7.7, 1.7$  Hz, ArH), 7.14 (1H, td,  $J = 7.5, 1.7$  Hz, ArH), 3.85 (2H, s, ArCH<sub>2</sub>), 3.51 (2H, t,  $J = 6.1$  Hz, CH<sub>2</sub>Cl), 2.54 (2H, t,  $J = 6.6$  Hz, O=CCH<sub>2</sub>CH<sub>2</sub>), 1.81 – 1.70 (4H, m, alkyl CH<sub>2</sub>CH<sub>2</sub>);  $\delta_{\text{C}}$  (100 MHz,  $\text{CDCl}_3$ ) 206.3 (C=O), 134.6 (C), 132.8 (CH), 131.7 (CH), 128.8 (CH), 127.6 (CH), 124.9 (C), 50.0 (CH<sub>2</sub>), 44.6 (CH<sub>2</sub>), 41.4 (CH<sub>2</sub>), 31.8 (CH<sub>2</sub>), 20.9 (CH<sub>2</sub>); HRMS ( $\text{ES}^+$ ): Exact mass calculated for  $\text{C}_{12}\text{H}_{14}\text{O}^{35}\text{Cl}^{79}\text{Br}$  [ $\text{M}+\text{Na}$ ] $^+$ : 310.9809, found: 310.9810.

### 1-(1-benzylpiperidin-4-yl)-4-phenylbutan-2-one - 2m

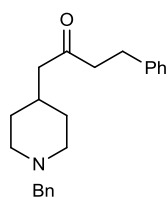

The title compound was prepared from 2,2,6,6-tetramethylpiperidine (0.101 mL, 0.6 mmol), *n*-butyllithium (0.240 mL, 2.5 M in hexanes, 0.6 mmol) and 2,2'-(3-phenylpropane-1,1-diyl)bis(4,4,5,5-tetramethyl-1,3,2-dioxaborolane) (223 mg, 0.6 mmol) and 1-benzylpiperidine-4-carboxaldehyde (99.0  $\mu$ L, 0.5 mmol) in THF (2 mL), followed by oxidation by sodium perborate (115 mg, 0.75 mmol) in water (1.65 mL) and acetone (2.0 mL). The compound was purified by column chromatography using EtOAc / hexane (10 to 20%) as eluent to yield the title compound as a colourless oil (85 mg, 53%).  $\nu_{\text{max}}$  (neat): 2921 (CH), 1709 (C=O), 1495, 1453, 1365, 1114, 1077, 740, 698  $\text{cm}^{-1}$ ;  $\delta_{\text{H}}$  (400 MHz,  $\text{CDCl}_3$ ) 7.33 – 7.22 (7H, m, ArH), 7.21 – 7.14 (3H, m, ArH), 3.51 (2H, s,  $\text{PhCH}_2\text{N}$ ), 2.91 – 2.81 (4H, m,  $\text{N}(\text{CH}_2)_2$ ), 2.70 (2H, t,  $J = 7.7$  Hz,  $\text{PhCH}_2$ ), 2.30 (2H, d,  $J = 6.8$  Hz,  $\text{O}=\text{CCH}_2\text{CH}$ ), 1.99 (2H, td,  $J = 11.8, 2.3$  Hz), 1.88 – 1.76 (2H, m), 1.60 (2H, d,  $J = 12.9$  Hz), 1.34 – 1.20 (1H, m);  $\delta_{\text{C}}$  (100 MHz,  $\text{CDCl}_3$ ) 209.4 (C=O), 141.0 (C), 129.3 (2 x CH), 128.5 (2 x CH), 128.3 (CH), 128.2 (2 x CH), 127.1 (CH), 126.1 (2 x CH), 63.2 ( $\text{CH}_2$ ), 53.4 (2 x  $\text{CH}_2$ ), 49.6 ( $\text{CH}_2$ ), 44.9 ( $\text{CH}_2$ ), 31.9 ( $\text{CH}_2$ ), 31.6 (CH), 29.7 (2 x  $\text{CH}_2$ ); HRMS ( $\text{ES}^+$ ): Exact mass calculated for  $\text{C}_{23}\text{H}_{27}\text{NO}$   $[\text{M}+\text{H}]^+$ : 322.2165, found: 322.2165.

### 1-cyclopentyl-2-(furan-2-yl)ethan-1-one - 2n

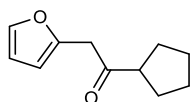

The title compound was prepared from 2,2,6,6-tetramethylpiperidine (0.101 mL, 0.6 mmol), *n*-butyllithium (0.240 mL, 2.5 M in hexanes, 0.6 mmol) and 2,2'-(cyclopentylmethylene)bis(4,4,5,5-tetramethyl-1,3,2-dioxaborolane) (202 mg, 0.6 mmol) and 2-furaldehyde (41.0  $\mu$ L, 0.5 mmol) in THF (2 mL), followed by oxidation by sodium perborate (115 mg, 0.75 mmol) in water (1.65 mL) and acetone (2.0 mL). The compound was purified by column chromatography using  $\text{Et}_2\text{O}$  / hexane (10%) as eluent to yield the title compound as a colourless oil (75 mg, 84%).  $\delta_{\text{H}}$  (400 MHz,  $\text{CDCl}_3$ ) 7.35 (1H, d,  $J = 1.1$  Hz, ArH), 6.34 (1H, dd,  $J = 3.0, 2.1$  Hz, ArH), 6.19 (1H, d,  $J = 3.0$  Hz, ArH), 3.76 (2H, s,  $\text{ArCH}_2$ ), 2.95 (1H, pent,  $J = 8.0$  Hz,  $\text{O}=\text{CCH}$ ), 1.81 – 1.71 (4H, m,  $\text{CH}(\text{CH}_2)_2$ ), 1.71 – 1.50 (4H, m,  $\text{CHCH}_2(\text{CH}_2)_2$ );  $\delta_{\text{C}}$  (100 MHz,  $\text{CDCl}_3$ ) 208.4 (C=O), 148.6 (C), 141.9 (CH), 110.6 (CH), 109.1 (CH), 50.5 (CH), 41.5 ( $\text{CH}_2$ ), 28.9 ( $\text{CH}_2$ ), 26.0 ( $\text{CH}_2$ ); HRMS ( $\text{ES}^+$ ): Exact mass calculated for  $\text{C}_{11}\text{H}_{14}\text{O}_2$   $[\text{M}+\text{Na}]^+$ : 201.0886, found: 201.0889.



### 1-(2-bromophenyl)-4-methylhexan-2-one - 2o

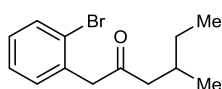

The title compound was prepared from 2,2,6,6-tetramethylpiperidine (20.0  $\mu$ L, 0.12 mmol), *n*-butyllithium (75.0  $\mu$ L, 1.6 M in hexanes, 0.12 mmol) and 2,2'-(2-(2-bromophenyl)ethane-1,1-diyl)bis(4,4,5,5-tetramethyl-1,3,2-dioxaborolane) (52.0 mg, 0.12 mmol) and 2-methylbutyraldehyde (11.0  $\mu$ L, 0.1 mmol) in THF (1 mL), followed by oxidation by sodium perborate (23.0 mg, 0.15 mmol) in water (0.4 mL) and acetone (0.5 mL). The compound was purified by column chromatography using EtOAc / hexane (5%) as eluent to yield the title compound as a colourless oil (25 mg, 91%).  $\delta_{\text{H}}$  (500 MHz,  $\text{CDCl}_3$ ) 7.57 (1H, d,  $J$  = 8.0 Hz, ArH), 7.28 (1H, t,  $J$  = 7.1 Hz, ArH), 7.23 – 7.19 (1H, m, ArH), 7.14 (1H, td,  $J$  = 7.8, 1.5 Hz, ArH), 3.85 (2H, s, ArCH<sub>2</sub>), 2.49 (1H, dd,  $J$  = 16.2, 5.7 Hz, O=CCH<sub>2</sub>CH), 2.30 (1H, dd,  $J$  = 16.2, 8.0 Hz, O=CCH<sub>2</sub>CH), 2.03 – 1.92 (1H, m), 1.39 – 1.29 (1H, m), 1.26 – 1.14 (1H, m), 0.90 (3H, d,  $J$  = 6.7 Hz, CHCH<sub>3</sub>), 0.87 (3H, t,  $J$  = 7.4 Hz, CH<sub>2</sub>CH<sub>3</sub>);  $\delta_{\text{C}}$  (125 MHz,  $\text{CDCl}_3$ ) 206.9 (C=O), 134.8 (C), 132.8 (CH), 131.7 (CH), 128.7 (CH), 127.6 (CH), 125.0 (C), 50.5 (CH<sub>2</sub>), 49.6 (CH<sub>2</sub>), 30.6 (CH), 29.4 (CH<sub>2</sub>), 19.4 (CH<sub>3</sub>), 11.3 (CH<sub>3</sub>); HRMS ( $\text{ES}^+$ ): Exact mass calculated for  $\text{C}_{11}\text{H}_{14}\text{O}_2$  [ $\text{M}+\text{Na}$ ] $^+$ : 201.0886, found: 201.0889.

### 2-methyl-5-phenylpent-1-en-3-one - 3

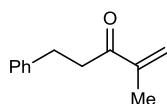

The title compound was prepared from 2,2,6,6-tetramethylpiperidine (0.101 mL, 0.6 mmol), *n*-butyllithium (0.240 mL, 2.5 M in hexanes, 0.6 mmol) and 2,2'-(3-phenylpropane-1,1-diyl)bis(4,4,5,5-tetramethyl-1,3,2-dioxaborolane) (223 mg, 0.6 mmol) and chloroacetone (40.0  $\mu$ L, 0.5 mmol) in THF (2 mL), followed by oxidation by sodium perborate (115 mg, 0.75 mmol) in water (1.65 mL) and acetone (2.0 mL). The compound was purified by column chromatography using Et<sub>2</sub>O / hexane (10%) as eluent to yield the title compound as a colourless oil (57 mg, 65%).  $\delta_{\text{H}}$  (300 MHz,  $\text{CDCl}_3$ ) 7.25 – 7.07 (5H, m, ArH), 5.87 (1H, dq,  $J$  = 0.9, 0.6 Hz, C=CH), 5.68 (1H, dd,  $J$  = 1.4, 0.6 Hz, C=CH), 2.98 – 2.90 (2H, m), 2.90 – 2.82 (2H, m), 1.81 (3H, dd,  $J$  = 1.4, 0.9 Hz);  $\delta_{\text{C}}$  (100 MHz,  $\text{CDCl}_3$ ) 201.0 (C=O), 144.4 (C), 141.4 (C), 128.5 (2 x CH), 128.4 (2 x CH), 126.0 (CH), 124.6 (CH<sub>2</sub>), 39.3 (CH<sub>2</sub>), 30.3 (CH<sub>2</sub>), 17.6 (CH<sub>3</sub>);  $m/z$  ( $\text{ES}^+$ ) 197 [ $\text{M}+\text{Na}$ ] $^+$ . Data is in full agreement with the literature.<sup>3</sup>

<sup>3</sup> M. Tang, C.-A. Fan, F.-M. Zhang, Y.-Q. Tu\*, W.-X. Zhang and A.-X. Wang, *Org. Lett.*, **2008**, *10*, 5585–5588

#### (R)-1-cyclopentyl-3-methyl-4-phenylbutan-1-one – 4

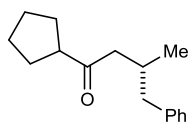

The title compound was prepared from 2,2,6,6-tetramethylpiperidine (41.0  $\mu$ L, 0.24 mmol), *n*-butyllithium (0.150 mL, 1.6 M in hexanes, 0.24 mmol) and 2,2'-(cyclopentylmethylene)bis(4,4,5,5-tetramethyl-1,3,2-dioxaborolane) (81.0 mg, 0.24 mmol) and (R)-2-methyl-3-phenylpropanal (30.0 mg, 0.2 mmol) in THF (1 mL), followed by oxidation by sodium perborate (46.0 mg, 0.30 mmol) in water (0.8 mL) and acetone (1.0 mL). The compound was purified by column chromatography using Et<sub>2</sub>O / hexane (10%) as eluent to yield the title compound as a colourless oil (32 mg, 70%).  $\delta_{\text{H}}$  (500 MHz, CDCl<sub>3</sub>) 7.27 (2H, t,  $J$  = 7.4 Hz, ArH), 7.19 (1H, t,  $J$  = 7.4 Hz, ArH), 7.16 (2H, d,  $J$  = 7.4 Hz, ArH), 2.80 (1H, pent,  $J$  = 7.7 Hz, O=CCH), 2.59 (1H, dd,  $J$  = 13.2, 6.4 Hz, O=CCH<sub>2</sub>), 2.46 (1H, dd,  $J$  = 13.2, 7.3 Hz, O=CCH<sub>2</sub>), 2.43 (1H, dd,  $J$  = 15.5, 4.8 Hz, PhCH<sub>2</sub>), 2.40 – 2.32 (1H, m, CHCH<sub>3</sub>) 2.30 (1H, dd,  $J$  = 15.5, 7.5 Hz, PhCH<sub>2</sub>), 1.83 – 1.51 (8H, m, cyclopentylCH<sub>2</sub>), 0.89 (3H, d,  $J$  = 6.4 Hz, CH<sub>3</sub>);  $\delta_{\text{C}}$  (125 MHz, CDCl<sub>3</sub>) 212.9 (C=O), 140.6 (C), 129.2 (2  $\times$  CH), 128.2 (2  $\times$  CH), 125.9 (CH), 51.8 (CH), 48.5 (CH<sub>2</sub>), 43.2 (CH<sub>2</sub>), 30.9 (CH), 29.0 (CH<sub>2</sub>), 28.6 (CH<sub>2</sub>), 26.0 (CH<sub>2</sub>), 25.9 (CH<sub>2</sub>), 19.8 (CH<sub>3</sub>); HRMS (ES<sup>+</sup>): Exact mass calculated for C<sub>11</sub>H<sub>14</sub>O<sub>2</sub> [M+Na]<sup>+</sup>: 201.0886, found: 201.0889. Enantiomeric excess was determined by HPLC with a Chiralcel IC column (99:1 hexane:*i*-PrOH, 1.0 mL/min, 210 nm, 25 °C);  $t_{\text{r}}$  (minor) = 10.4 min,  $t_{\text{r}}$  (major) = 10.9 min; 98% ee.

#### (E)-4,4,5,5-tetramethyl-2-styryl-1,3,2-dioxaborolane – 5a'

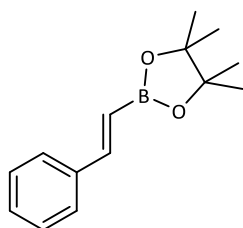

The title compound was prepared from 2,2,6,6-tetramethylpiperidine (0.570 mL, 3.3 mmol), *n*-butyllithium (2.64 mL, 2.5 M in hexanes, 3.3 mmol) and bis(4,4,5,5-tetramethyl-1,3,2-dioxaborolan-2-yl)methane (0.885 g, 3.3 mmol) and benzaldehyde (0.300 mL, 3.0 mmol). The compound was purified by column chromatography using EtOAc / hexane (10%) as eluent to yield the title compound as a colourless oil (0.474 g, 69%).  $\delta_{\text{H}}$  (300 MHz, CDCl<sub>3</sub>) 7.52 – 7.28 (6H, m, ArH and PhCH), 6.17 (1H, d,  $J$  = 18.4 Hz, CHBpin), 1.32 (12H, s, CH<sub>3</sub>).  $\delta_{\text{C}}$  (75 MHz, CDCl<sub>3</sub>) 149.5 (BC=CH), 128.9 (CH), 128.6 (CH), 127.1 (CH), 83.4 (CCH<sub>3</sub>), 24.8 (CCH<sub>3</sub>).  $m/z$  (ES<sup>+</sup>) 231 [M+H]<sup>+</sup>. Data in full agreement with the literature.<sup>4</sup>

<sup>4</sup> D. S. Matteson and D. Majumdar, *Organometallics*, 1983, **2**, 230–236.

## 2-phenylacetaldehyde – 5a

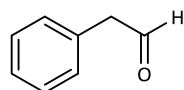

Alkenyl-boronate **5a'** (270 mg, 1.2 mmol) was dissolved in acetone (2.7 mL) and stirred until a homogenous solution was achieved. An Oxone® (360 mg, 1.17 mmol) solution in water (3.6 mL) was added dropwise to the solution of alkenyl boronate at 0 °C over 5 mins, and stirred for 1 h. Upon completion the reaction was quenched with 1M HCl (1 mL) and extracted with DCM (3 × 25 mL). The combined organics were washed with water, brine, dried over MgSO<sub>4</sub> and concentrated *in vacuo*. The compound was purified via column chromatography using EtOAc / hexane (10%) as eluent to yield the title compound as a colourless oil (111 mg, 79%). A second experiment with yield 106 mg (74%) was also performed.  $\delta_{\text{H}}$  (300 MHz, CDCl<sub>3</sub>) 9.75 (1H, t,  $J$  = 2.4 Hz, CHO), 7.41 – 7.31 (3H, m, ArH), 7.25 – 7.20 (2H, m, ArH), 3.68 (2H, d,  $J$  = 2.3 Hz, CH<sub>2</sub>). Data in full agreement with the literature.<sup>5</sup>

## 3-phenylpropanal – 5b

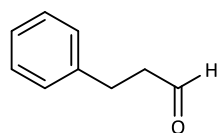

The title compound was prepared from 2,2,6,6-tetramethylpiperidine (0.324 mL, 1.90 mmol), *n*-butyllithium (0.760 mL, 2.5 M in hexanes, 1.90 mmol) and bis(4,4,5,5-tetramethyl-1,3,2-dioxaborolan-2-yl)methane (510 mg, 1.90 mmol) and 2-phenylacetaldehyde (210 mg, 1.75 mmol) in THF (4 mL), followed by oxidation by sodium perborate (250 mg, 2.5 mmol) in water (3.3 mL) and acetone (4.0 mL). The compound was purified by column chromatography using EtOAc / hexane (10%) to yield the title compound as a colourless oil (209 mg, 89%).  $\delta_{\text{H}}$  (300 MHz, CDCl<sub>3</sub>) 9.82 (1H, s, CHO), 7.33 – 7.17 (5H, m, ArH), 2.96 (2H, t,  $J$  = 7.7 Hz, CH<sub>2</sub>), 2.78 (2H, t,  $J$  = 7.7 Hz, CH<sub>2</sub>). Data in full agreement with the literature.<sup>6</sup>

## 2-methyl-6-phenylhexan-3-one – 5c

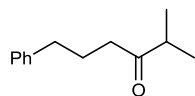

The title compound was prepared from 2,2,6,6-tetramethylpiperidine (0.236 mL, 1.4 mmol), *n*-butyllithium (0.560 mL, 2.5 M in hexanes, 1.4 mmol) and 2,2'-(2-methylpropane-1,1-diyl)bis(4,4,5,5-tetramethyl-1,3,2-dioxaborolane) (0.433 g, 1.4 mmol) and 3-phenylpropanal (0.165 mL, 1.25 mmol) in THF (3 mL), followed by oxidation by sodium perborate (0.200 g, 2.00 mmol) in water (3.3 mL) and acetone (4 mL). The compound was purified by column

<sup>5</sup> M. W. C. Robinson, K. S. Pillinger, I. Mabbett, D. A. Timms and A. E. Graham, *Tetrahedron*, 2010, **66**, 8377–8382.

<sup>6</sup> T. D. Beeson and D. W. C. Macmillan, *J. Am. Chem. Soc.*, 2005, **127**, 8826–8.

chromatography using EtOAc / hexane (5%) as eluent to yield the title compound as a colourless oil (0.168 g, 71%).  $\delta_{\text{H}}$  (400 MHz,  $\text{CDCl}_3$ ) 7.30 – 7.24 (2H, m, ArH), 7.21 – 7.15 (3H, m, ArH), 2.61 (2H, t,  $J$  = 7.4 Hz, ArCH<sub>2</sub>), 2.56 (1H, septet,  $J$  = 7.0 Hz, CH(CH<sub>3</sub>)<sub>2</sub>), 2.45 (2H, t,  $J$  = 7.4 Hz, O=CCH<sub>2</sub>), 1.90 (2H, pent,  $J$  = 7.4 Hz, ArCH<sub>2</sub>CH<sub>2</sub>), 1.07 (6H, d,  $J$  = 7.0 Hz, CH(CH<sub>3</sub>)<sub>2</sub>);  $\delta_{\text{C}}$  (100 MHz,  $\text{CDCl}_3$ ) 214.5 (C=O), 141.7 (C), 128.4 (2 × CH), 128.3 (2 × CH), 125.8 (CH), 40.8 (CH), 39.4 (CH<sub>2</sub>), 35.1 (CH<sub>2</sub>), 25.1 (CH<sub>2</sub>), 18.2 (2 × CH<sub>3</sub>); HRMS (ES<sup>+</sup>): Exact mass calculated for C<sub>13</sub>H<sub>18</sub>O [M+Na]<sup>+</sup>: 213.1250, found: 213.1250.

## 2-isopropyl-5-phenylpentanal – 5d

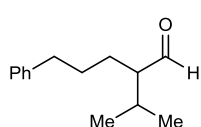

The title compound was prepared from 2,2,6,6-tetramethylpiperidine (0.200 mL, 1.2 mmol), *n*-butyllithium (0.480 mL, 2.5 M in hexanes, 1.2 mmol) and bis(4,4,5,5-tetramethyl-1,3,2-dioxaborolan-2-yl)methane (0.320 g, 1.2 mmol) and 2-methyl-6-phenylhexan-3-one (150 mg, 0.79 mmol) in THF (4 mL), followed by oxidation by sodium perborate (0.230 g, 1.5 mmol) in water (3.3 mL) and acetone (4.4 mL). The compound was purified by column chromatography using EtOAc / hexane (5%) as eluent to yield the title compound as a colourless oil (109 mg, 68%).  $\delta_{\text{H}}$  (400 MHz,  $\text{CDCl}_3$ ) 9.60 (1H, d,  $J$  = 3.5 Hz, CHO), 7.26 (2H, t,  $J$  = 7.5 Hz, ArH), 7.20 – 7.12 (3H, m, ArH), 2.68 – 2.53 (2H, m, PhCH<sub>2</sub>), 2.10 – 2.02 (1H, m, OHCCCH), 2.01 – 1.92 (1H, m), 1.74 – 1.44 (4H, m, CH<sub>2</sub>CH<sub>2</sub>), 0.94 (3H, d,  $J$  = 6.8 Hz, CH<sub>3</sub>), 0.93 (3H, d,  $J$  = 6.8 Hz, CH<sub>3</sub>);  $\delta_{\text{C}}$  (100 MHz,  $\text{CDCl}_3$ ) 205.8 (C=O), 141.9 (C), 128.31 (2 × CH), 128.29 (2 × CH), 125.8 (CH), 58.2 (CH), 35.9 (CH<sub>2</sub>), 29.3 (CH<sub>2</sub>), 28.3 (CH), 25.6 (CH<sub>2</sub>), 20.2 (CH<sub>3</sub>), 19.7 (CH<sub>3</sub>); HRMS (ES<sup>+</sup>): Exact mass calculated for C<sub>13</sub>H<sub>18</sub>O [M+Na]<sup>+</sup>: 227.1412, found: 227.1414.

## 4-(5-methylfuran-2-yl)pentanal – 6

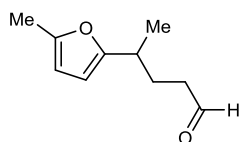

The title compound was prepared from 2,2,6,6-tetramethylpiperidine (0.101 mL, 0.6 mmol), *n*-butyllithium (0.240 mL, 2.5 M in hexanes, 0.6 mmol) and bis(4,4,5,5-tetramethyl-1,3,2-dioxaborolan-2-yl)methane (161 mg, 0.6 mmol) and 3-(5-methyl-2-furyl)butyraldehyde (75.0  $\mu\text{L}$ , 0.5 mmol) in THF (2 mL), followed by oxidation by sodium perborate (115 mg, 0.75 mmol) in water (1.65 mL) and acetone (2.0 mL). The compound was purified by column chromatography using EtOAc / hexane (10%) as eluent to yield the title compound as a colourless oil (68 mg, 82%).  $\delta_{\text{H}}$  (300 MHz,  $\text{CDCl}_3$ ) 9.70 (1H, s, CHO), 5.84 (2H, s, ArH), 2.91 – 2.70 (1H, m, ArCH), 2.42 (2H, t,  $J$  = 7.5 Hz, HOCCH<sub>2</sub>), 2.24 (3H, s, ArCH<sub>3</sub>), 1.99 – 1.81 (2H, m, CHCH<sub>2</sub>), 1.24 (3H, d,  $J$  = 8.6 Hz, CHCH<sub>3</sub>);  $\delta_{\text{C}}$  (100 MHz,  $\text{CDCl}_3$ ) 202.3 (C=O), 157.1 (C), 150.4 (C),

105.6 (CH), 104.9 (CH), 41.6 (CH<sub>2</sub>), 32.5 (CH), 28.0 (CH<sub>2</sub>), 19.1 (CH<sub>3</sub>), 13.5 (CH<sub>3</sub>); HRMS (ES<sup>+</sup>): Exact mass calculated for C<sub>10</sub>H<sub>14</sub>O<sub>2</sub> [M+Na]<sup>+</sup>: 189.0886, found: 189.0884.

### (E)-4,4,5,5-tetramethyl-2-(4-phenylbut-1-en-1-yl)-1,3,2-dioxaborolane - 7

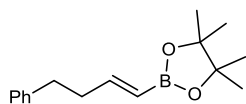

The title compound was prepared from 2,2,6,6-tetramethylpiperidine (0.101 mL, 0.6 mmol), *n*-butyllithium (0.240 mL, 2.5 M in hexanes, 0.6 mmol) and bis(4,4,5,5-tetramethyl-1,3,2-dioxaborolan-2-yl)methane (161 mg, 0.6 mmol) and hydrocinnamaldehyde (66.0 μL, 0.5 mmol) in THF (2 mL). The compound was purified by column chromatography using EtOAc / hexane (10%) as eluent to yield the title compound as a colourless oil (83 mg, 64%). δ<sub>H</sub> (400 MHz, CDCl<sub>3</sub>) 7.31 – 7.25 (2H, m, ArH), 7.22 – 7.16 (3H, m, ArH), 6.71 (1H, dt, *J* = 18.0, 6.2 Hz, CH<sub>2</sub>CH=), 5.51 (1H, dt, *J* = 18.0, 1.4 Hz, =CHB(pin)), 2.78 – 2.71 (2H, m, PhCH<sub>2</sub>), 2.52 – 2.44 (2H, m, =CHCH<sub>2</sub>), 1.27 (12H, s, 4 × CH<sub>3</sub>); δ<sub>C</sub> (100 MHz, CDCl<sub>3</sub>) 153.4 (CH), 141.7 (C), 128.3 (4 × CH), 125.8 (CH), 83.0 (C), 37.5 (CH<sub>2</sub>), 34.6 (CH<sub>2</sub>), 24.8 (4 × CH<sub>3</sub>). Data in full agreement with the literature.<sup>7</sup>

### 2,2'-(4-phenylbutane-1,1-diyl)bis(4,4,5,5-tetramethyl-1,3,2-dioxaborolane) - 8

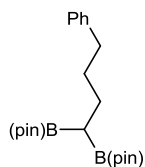

To a mixture of [Rh(cod)Cl]<sub>2</sub> (6.2 mg, 0.0125 mmol) and 1,4-bis(diphenylphosphino)butane (12.8 mg, 0.03 mmol) and (E)-4,4,5,5-tetramethyl-2-(4-phenylbut-1-en-1-yl)-1,3,2-dioxaborolane **7** (112 mg, 0.43 mmol) in 1,2-dichloroethane (0.5 mL) was added pinacolborane (87.0 μL, 0.6 mmol). The mixture was stirred at room temperature for 16 h then passed through a short column of silica using Et<sub>2</sub>O as eluent. After evaporation, the crude mixture was purified by column chromatography using EtOAc / hexane (5%) to give the title compound as a colourless oil (95 mg, 57%); δ<sub>H</sub> (400 MHz, CDCl<sub>3</sub>) 7.28 – 7.22 (2H, m, ArH), 7.21 – 7.12 (3H, m, ArH), 2.60 (2H, t, *J* = 7.0 Hz, PhCH<sub>2</sub>), 1.67 – 1.59 (4H, m, CH<sub>2</sub>CH<sub>2</sub>CH), 1.23 (12H, s, 4 × CH<sub>3</sub>), 1.22 (12H, s, 4 × CH<sub>3</sub>) 0.77 (1H, t, *J* = 6.0 Hz, CH(Bpin)<sub>2</sub>); δ<sub>C</sub> (100 MHz, CDCl<sub>3</sub>) 143.0 (C), 128.3 (2 × CH), 128.1 (2 × CH), 125.4 (CH), 82.9 (C), 36.0 (CH<sub>2</sub>), 34.3 (CH<sub>2</sub>), 25.5 (CH<sub>2</sub>), 28.8 (CH<sub>3</sub>), 24.5 (CH<sub>3</sub>). Data in full agreement with the literature.<sup>8</sup>

<sup>7</sup> K. Takai, Y. Kunisada, Y. Tachibana, N. Yamaji, E. Nakatani, *Bull. Chem. Soc. Jpn.*, **2004**, 77, 1581–1586

<sup>8</sup> C. Sun, B. Potter, J. P. Morken *J. Am. Chem. Soc.*, **2014**, 136, 6534–6537

## 8-(5-methylfuran-2-yl)-1-phenylnonan-4-one - 9

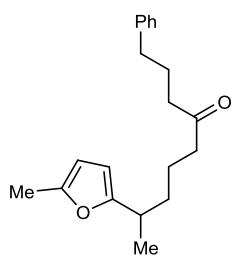

The title compound was prepared from 2,2,6,6-tetramethylpiperidine (44.0  $\mu\text{L}$ , 0.26 mmol), *n*-butyllithium (0.104 mL, 2.5 M in hexanes, 0.26 mmol) and 2,2'-(4-phenylbutane-1,1-diyl)bis(4,4,5,5-tetramethyl-1,3,2-dioxaborolane) **8** (100 mg, 0.26 mmol) and 4-(5-methylfuran-2-yl)pentanal **6** (28.0 mg, 0.168 mmol) in THF (1 mL), followed by oxidation by sodium perborate (50.0 mg, 0.32 mmol) in water (0.82 mL) and acetone (1.1 mL). The compound was purified by column chromatography using Et<sub>2</sub>O / hexane (10%) as eluent to yield the title compound as a colourless oil (26 mg, 53%).  $\nu_{\text{max}}$  (neat): 2970, 2926, 2875 (CH), 1708 (C=O), 1453, 1375, 1219, 1088, 1048 754  $\text{cm}^{-1}$ ;  $\delta_{\text{H}}$  (400 MHz, CDCl<sub>3</sub>) 7.31 – 7.25 (2H, m, ArH), 7.21 – 7.14 (3H, m, ArH), 5.83 (2H, s, ArH), 2.78 – 2.68 (1H, m, ArCH), 2.61 (2H, t,  $J = 7.6$  Hz, O=CCH<sub>2</sub>), 2.43 – 2.31 (4H, m, PhCH<sub>2</sub> and O=CCH<sub>2</sub>), 2.24 (3H, s, ArCH<sub>3</sub>), 1.89 (2H, pent,  $J = 7.6$  Hz, PhCH<sub>2</sub>CH<sub>2</sub>), 1.68 – 1.39 (4H, m, MeCHCH<sub>2</sub>CH<sub>2</sub>), 1.20 (3H, d,  $J = 7.0$  Hz, CHCH<sub>3</sub>);  $\delta_{\text{C}}$  (100 MHz, CDCl<sub>3</sub>) 210.8 (C=O), 158.4 (C), 150.0 (C), 141.6 (C), 128.5 (2  $\times$  CH), 128.4 (2  $\times$  CH), 125.9 (CH), 105.6 (CH), 104.1 (CH), 42.8 (CH<sub>2</sub>), 41.8 (CH<sub>2</sub>), 35.3 (CH<sub>2</sub>), 3.1 (CH<sub>2</sub>), 33.0 (CH), 25.2 (CH<sub>2</sub>), 21.4 (CH<sub>2</sub>), 19.1 (CH<sub>3</sub>), 13.5 (CH<sub>3</sub>); HRMS (ES<sup>+</sup>): Exact mass calculated for C<sub>19</sub>H<sub>24</sub>O<sub>2</sub> [M+Na]<sup>+</sup>: 307.1669, found: 307.1671.

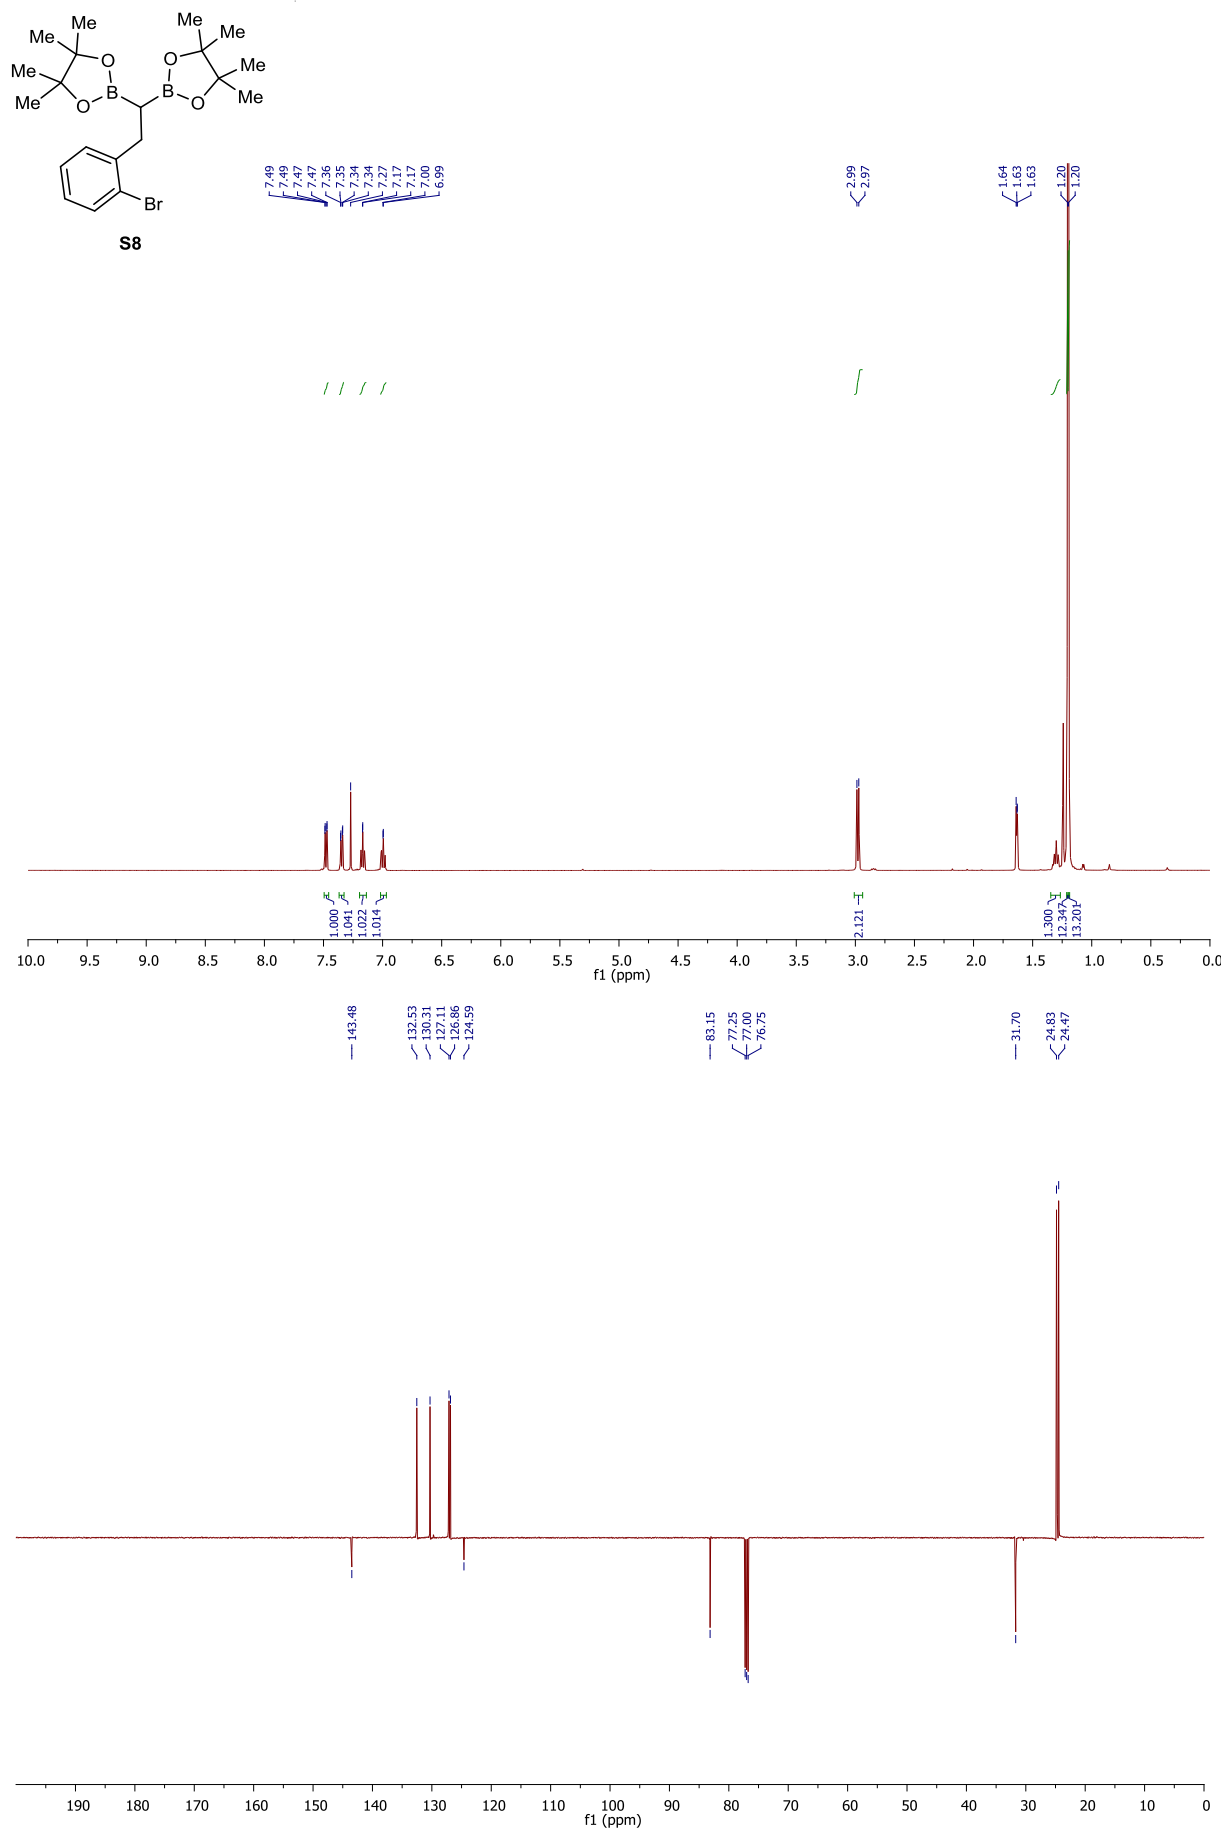

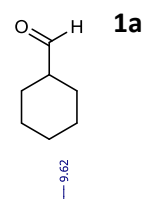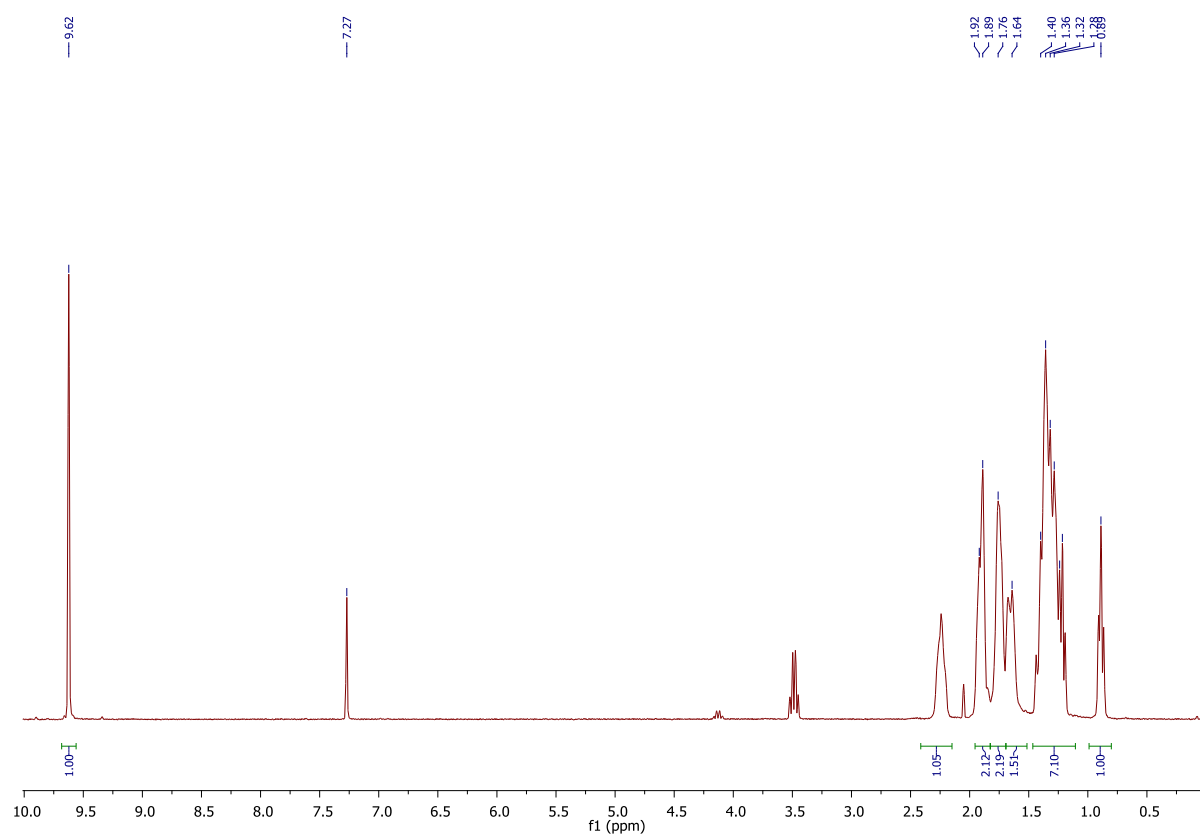



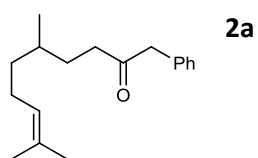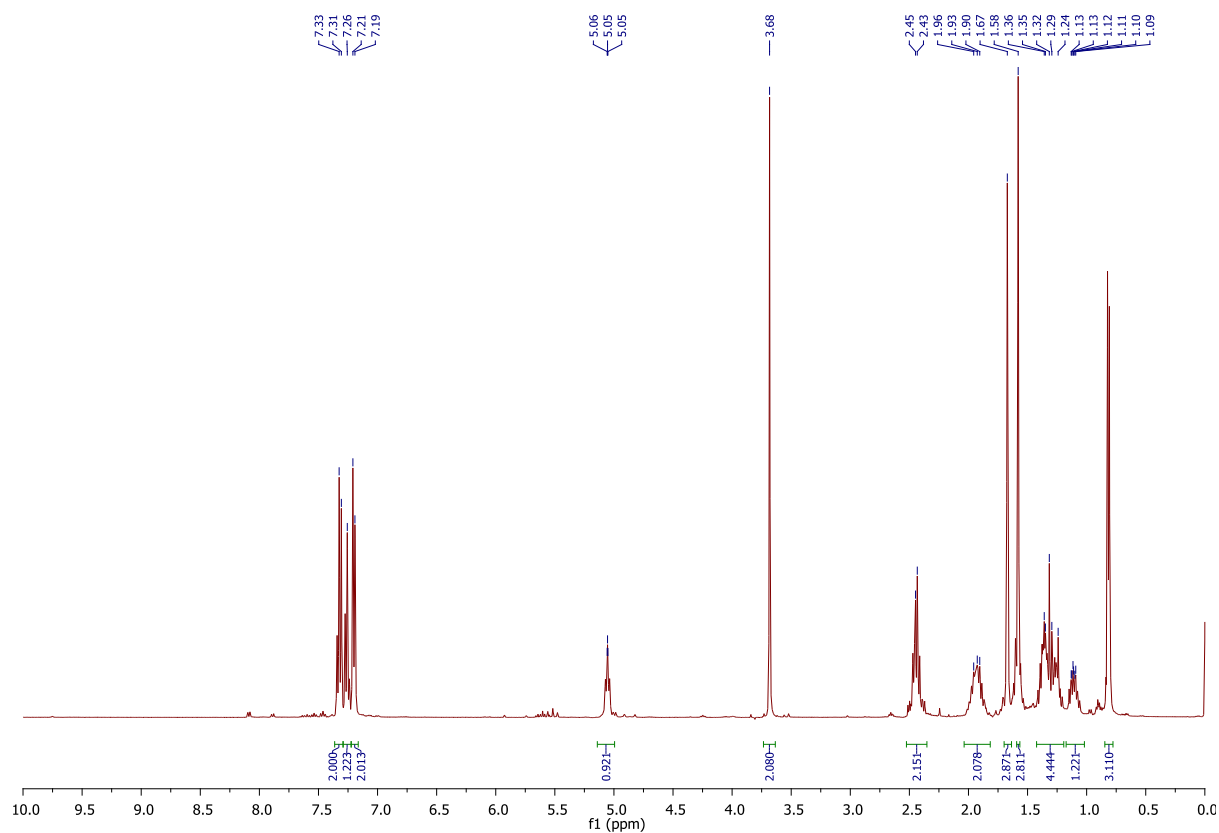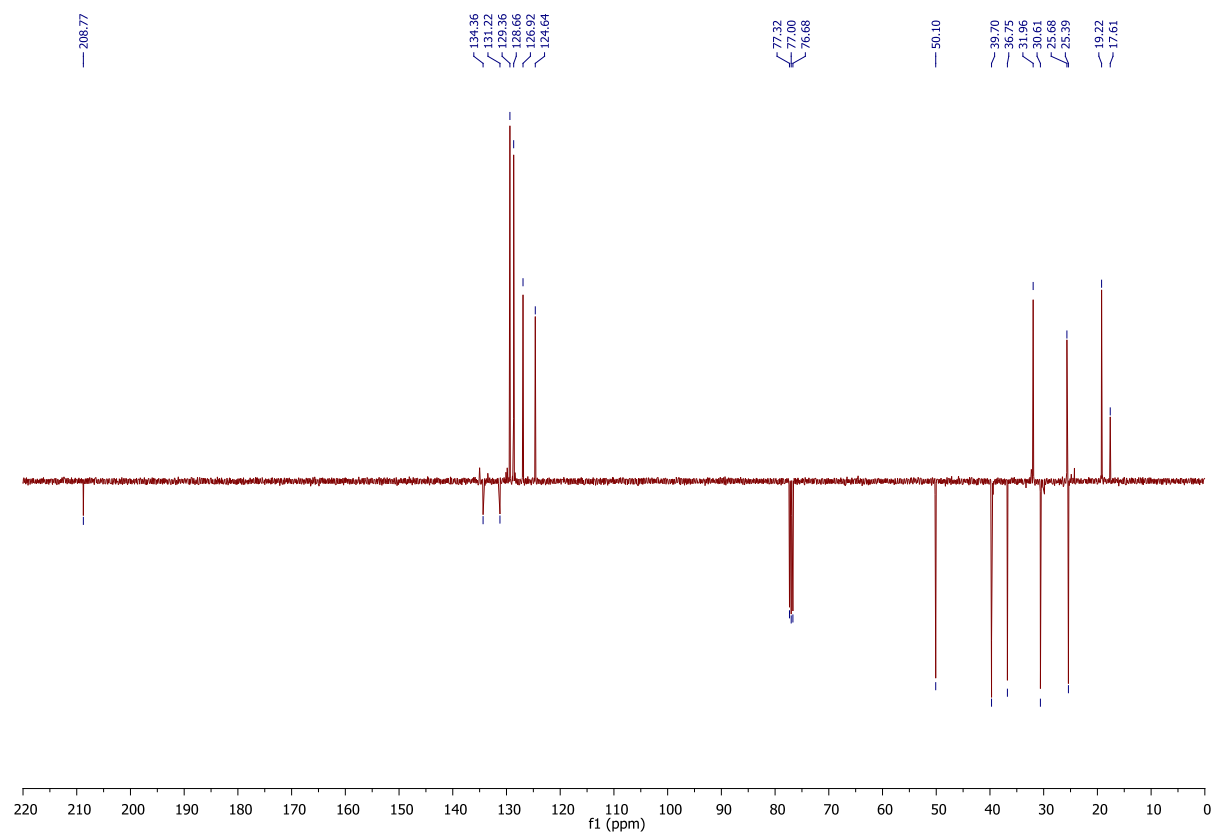

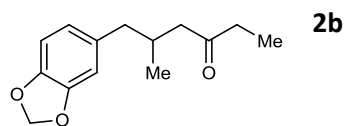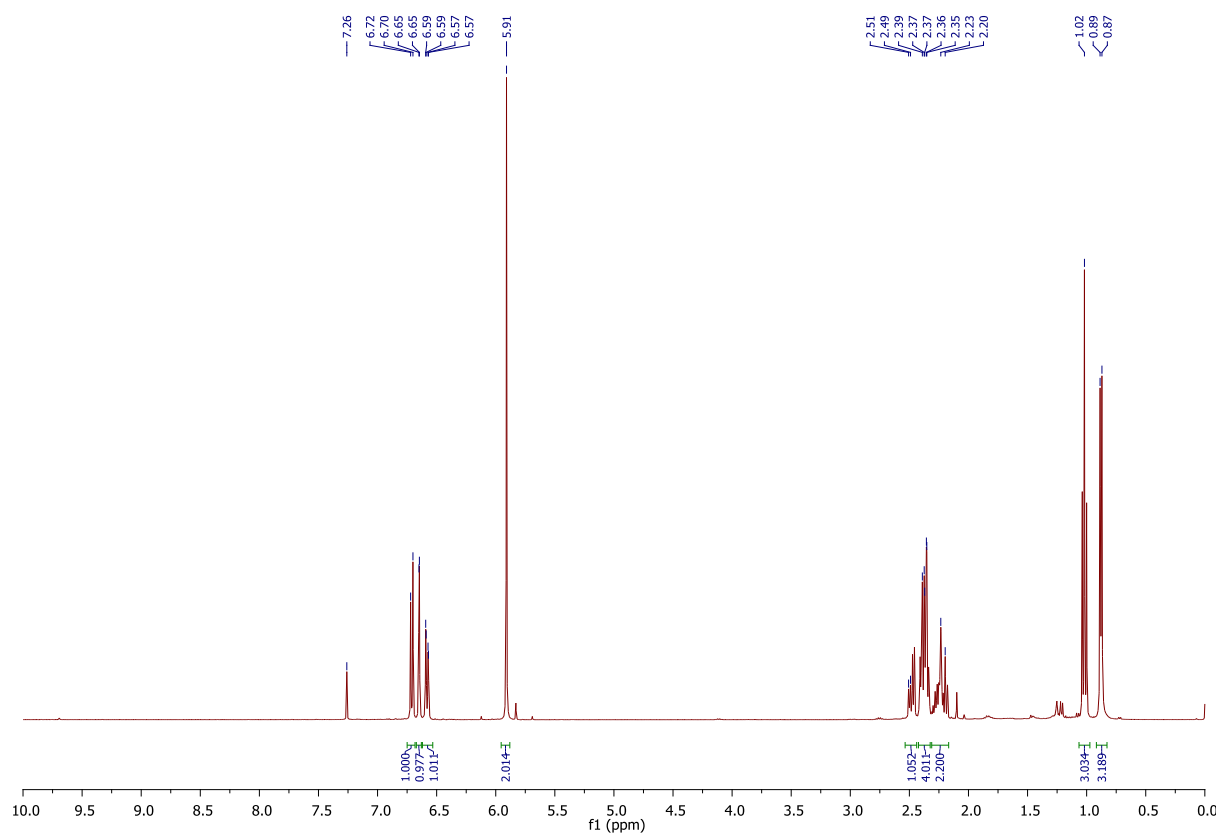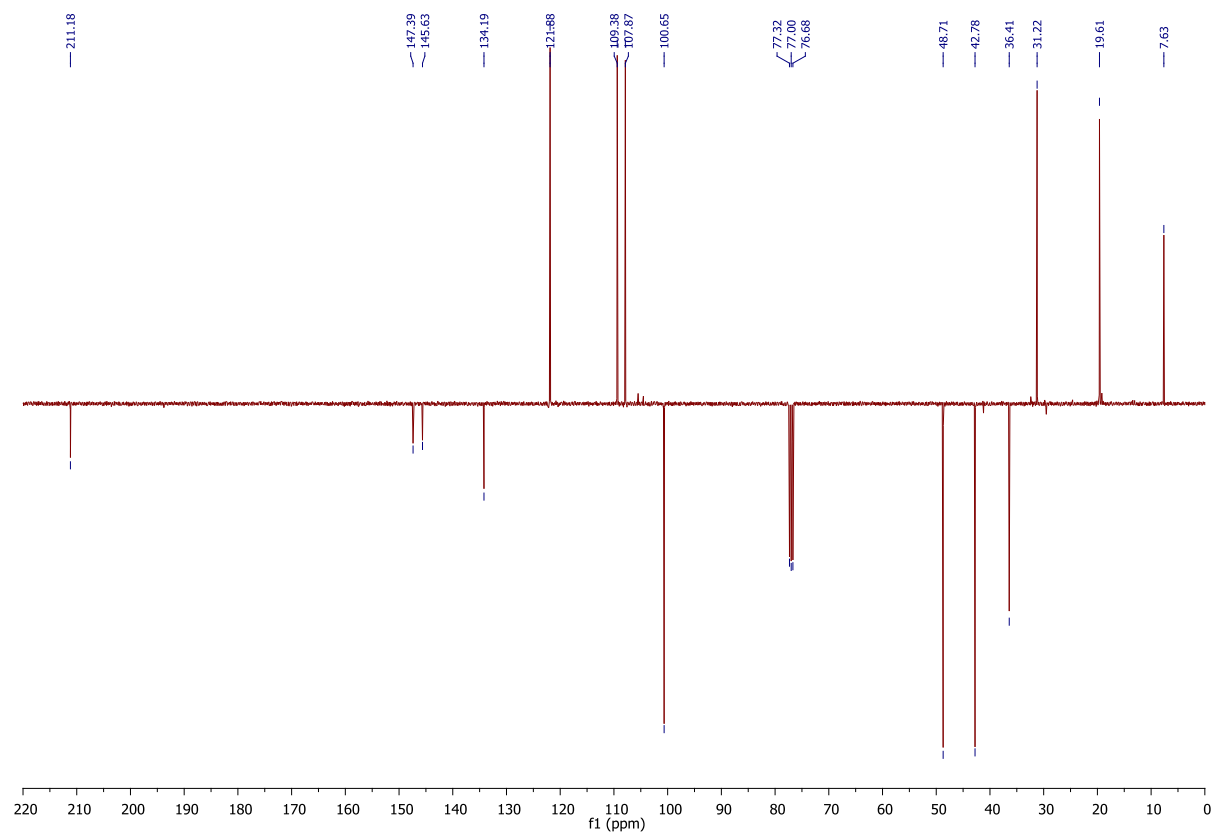

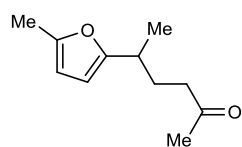

**2c**

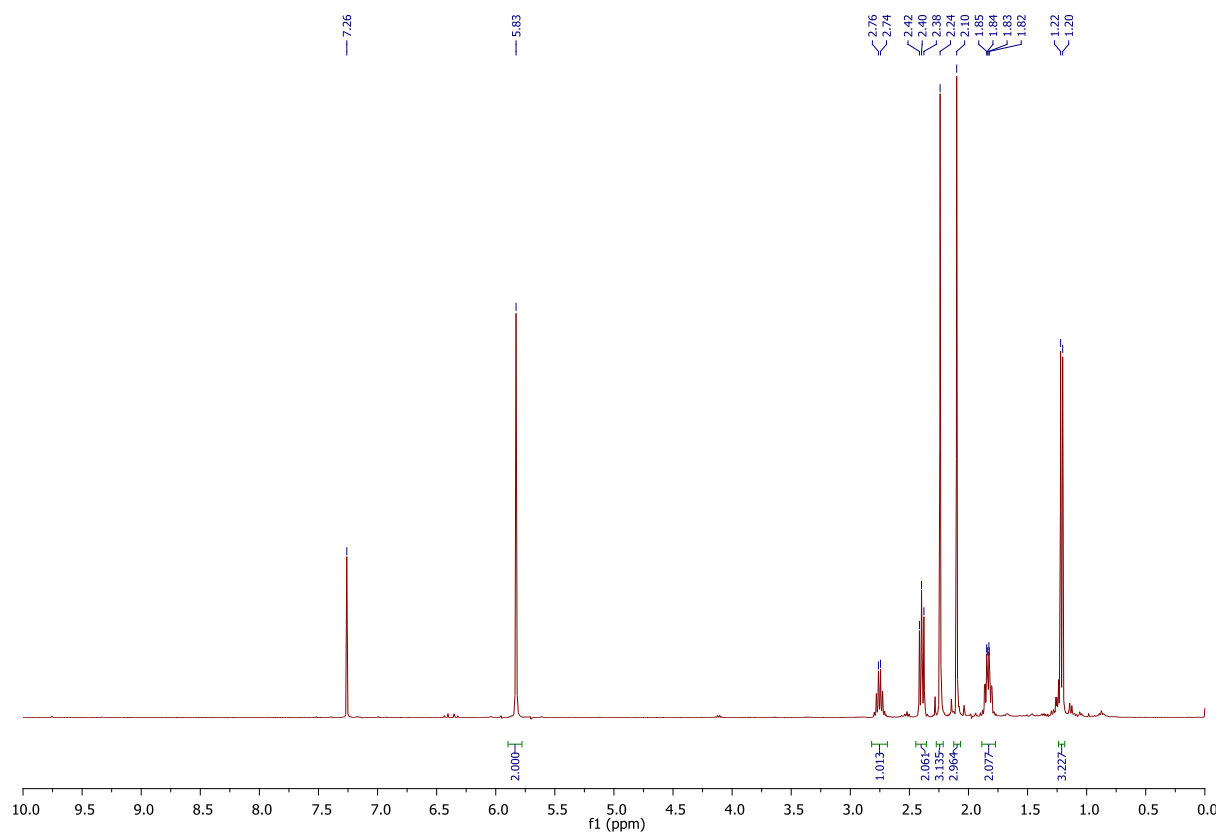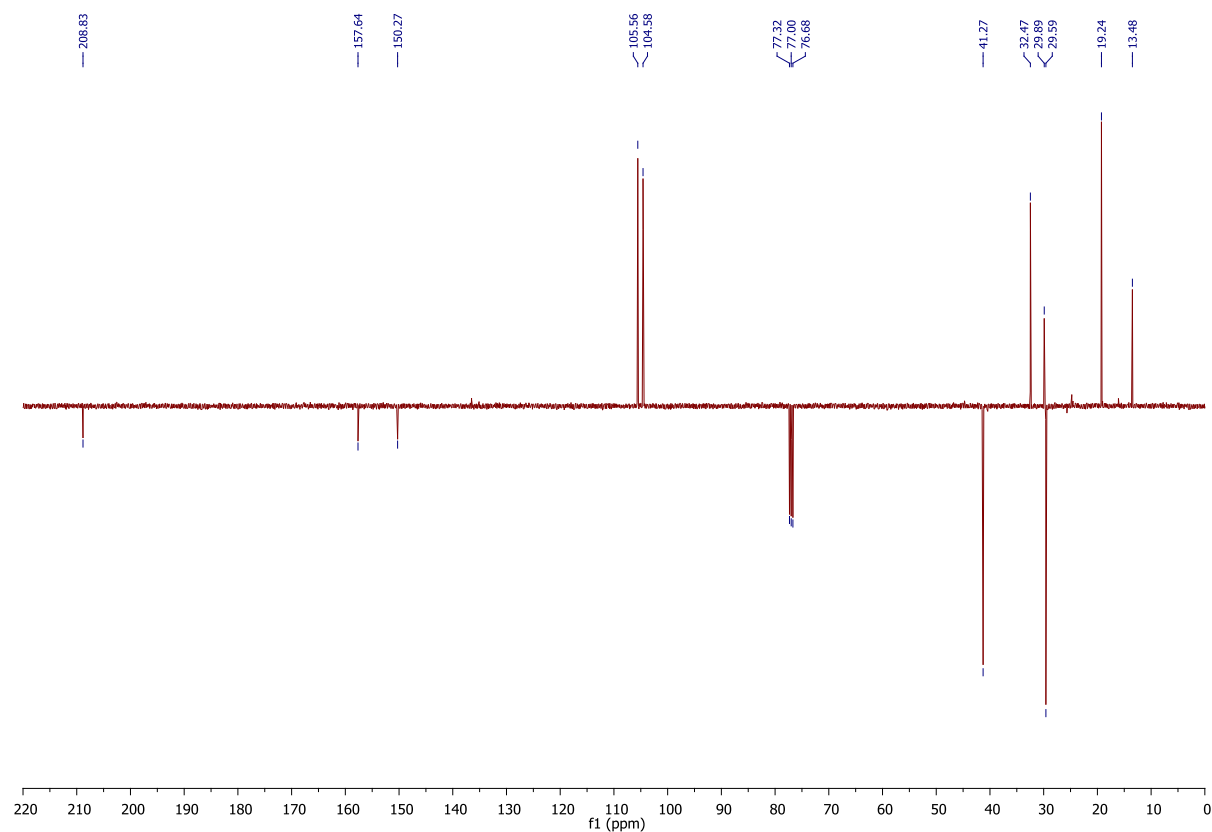

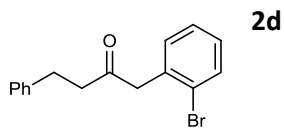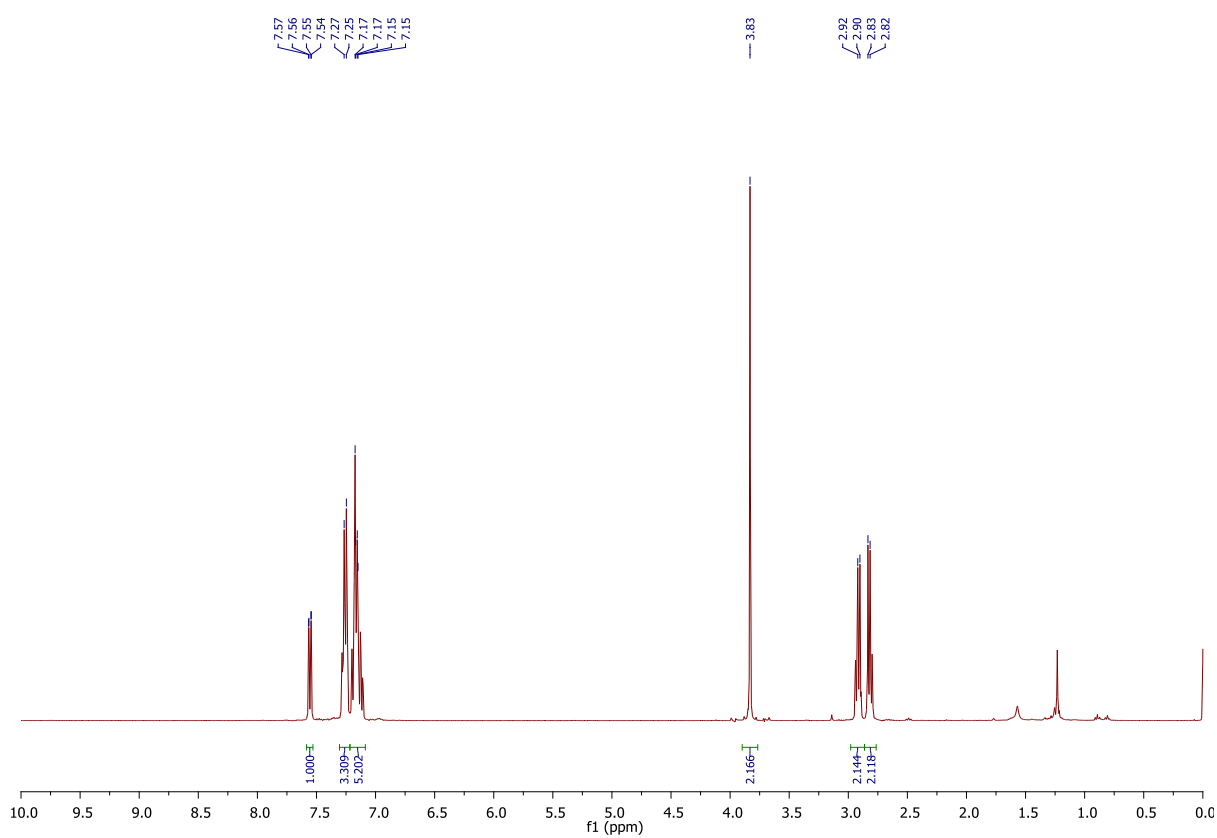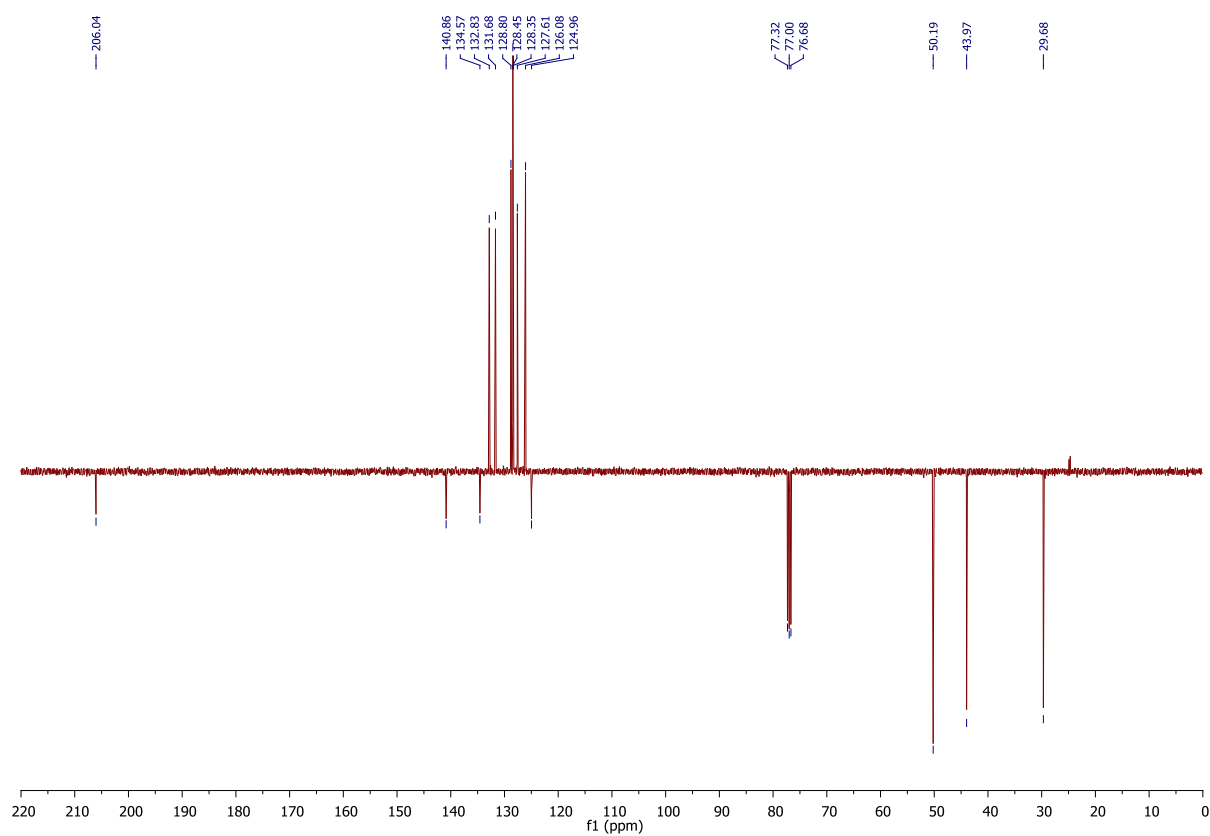

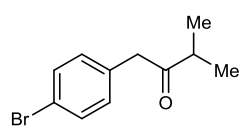

**2e**

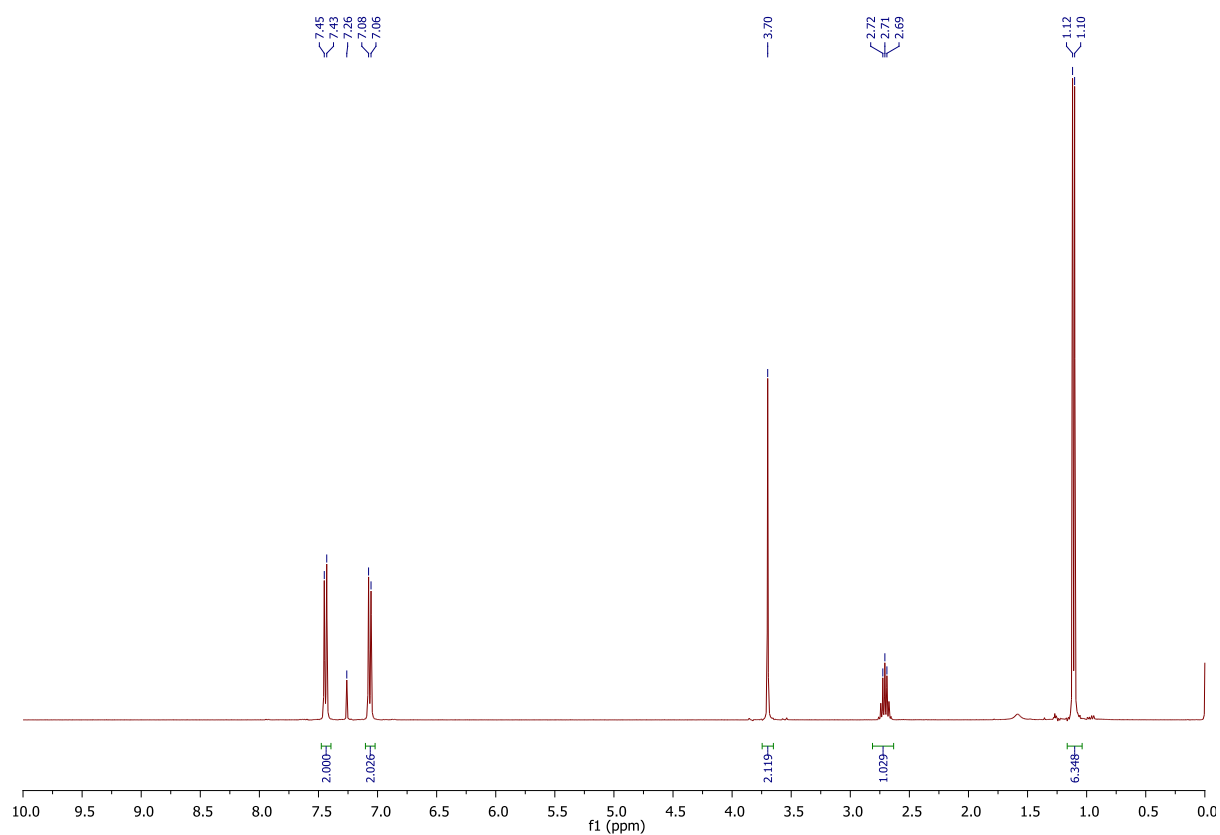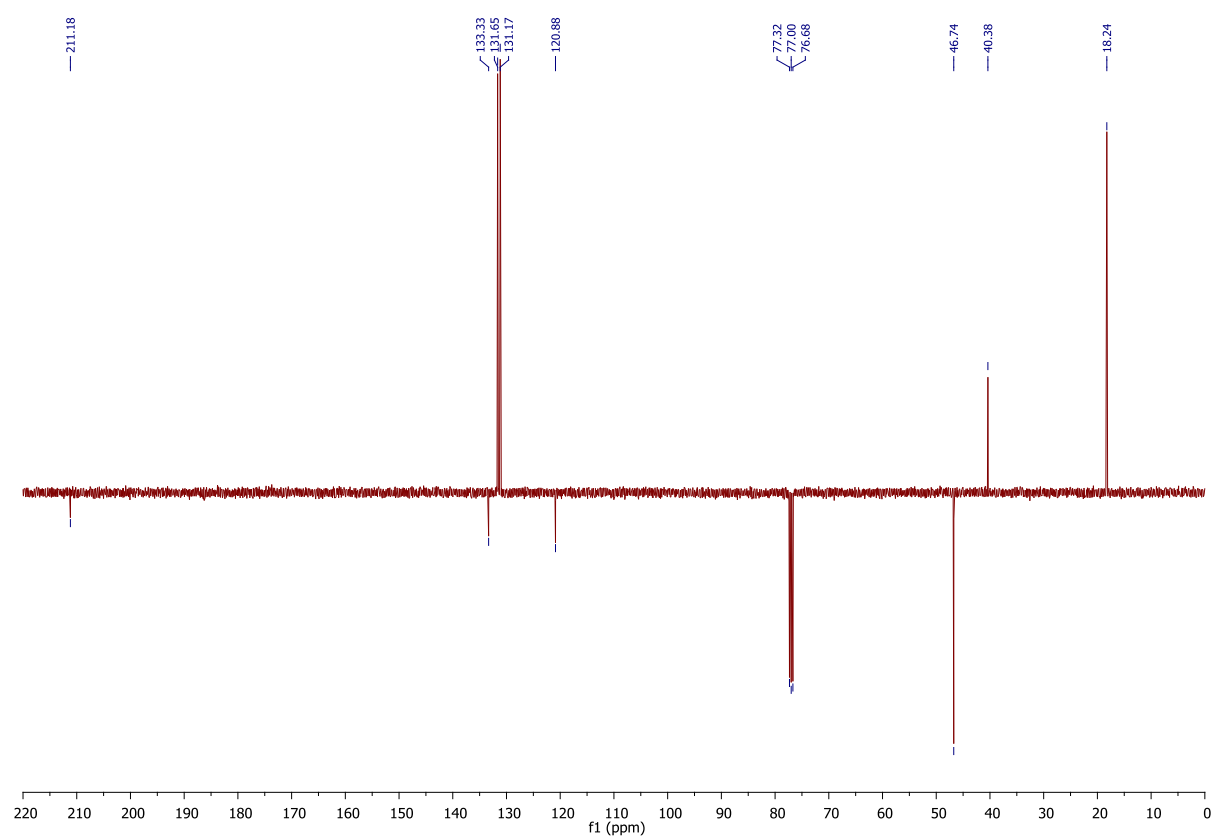

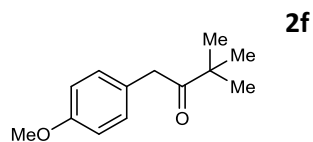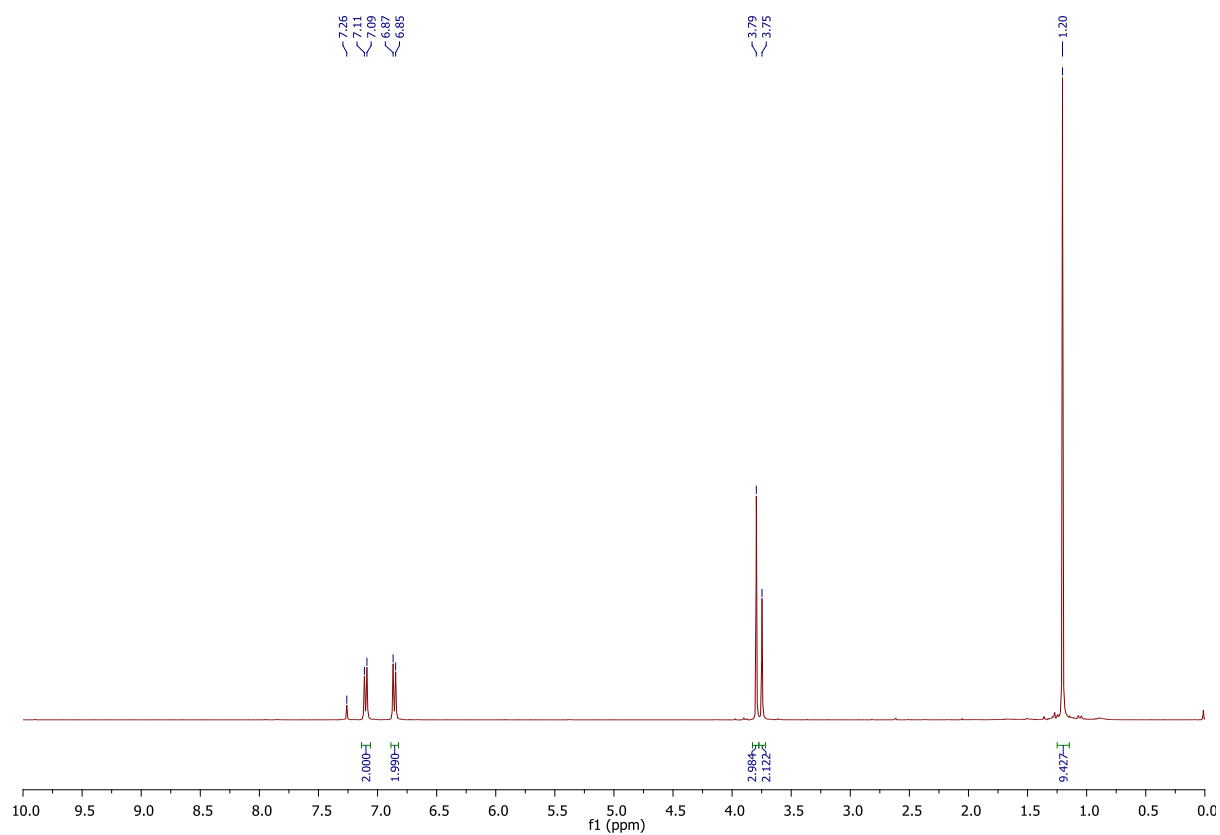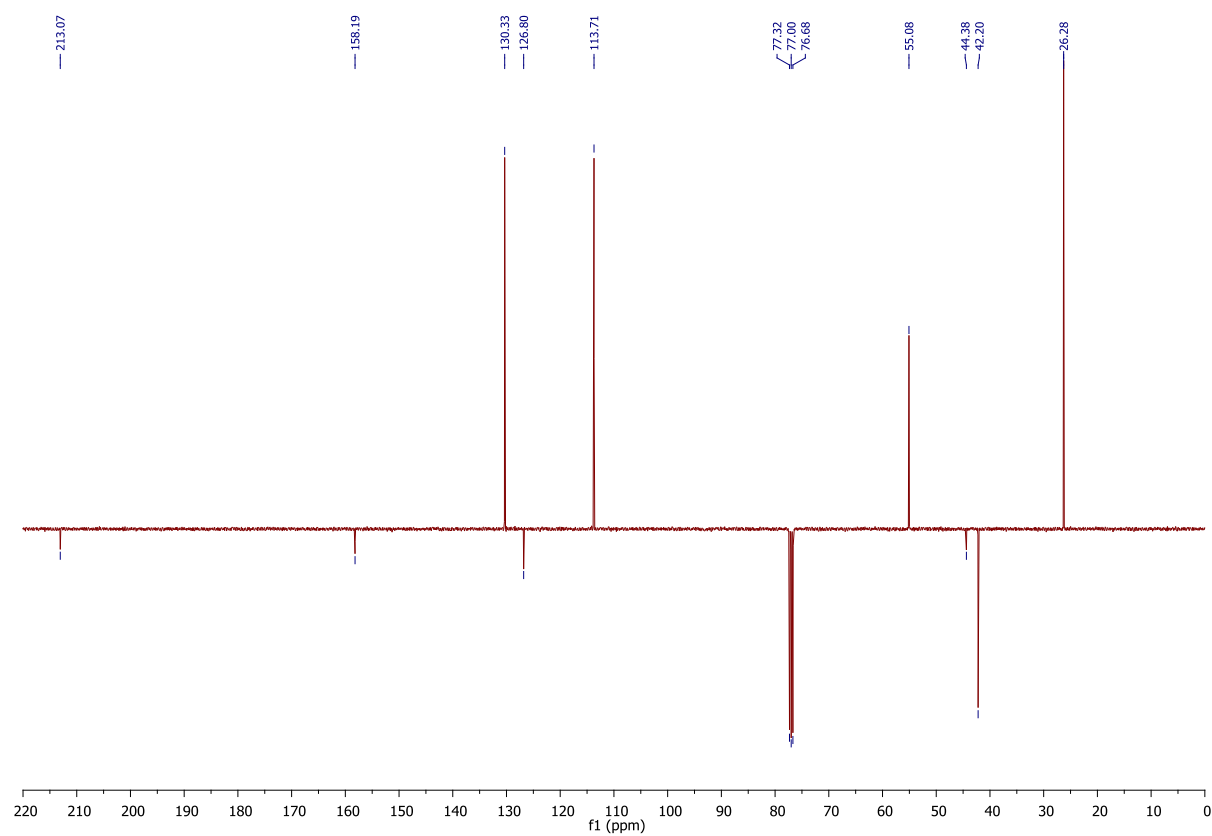

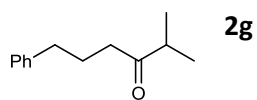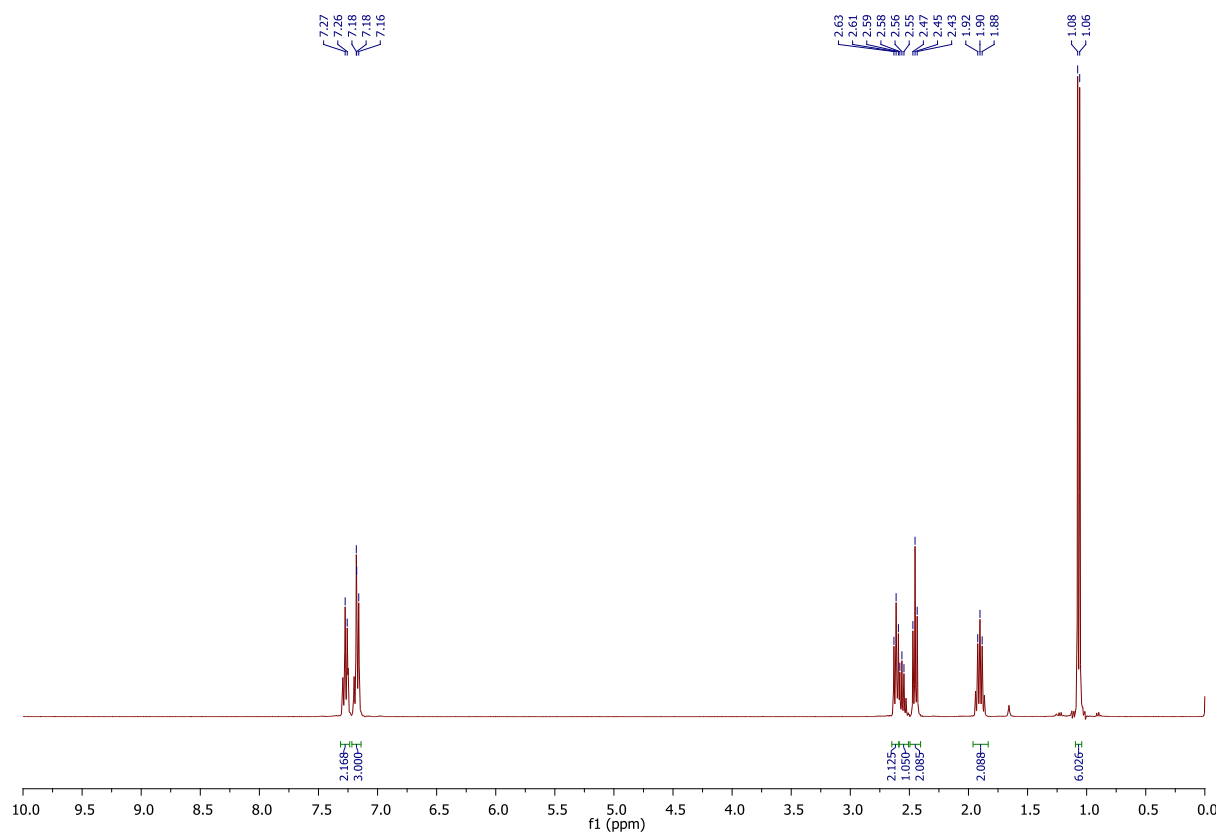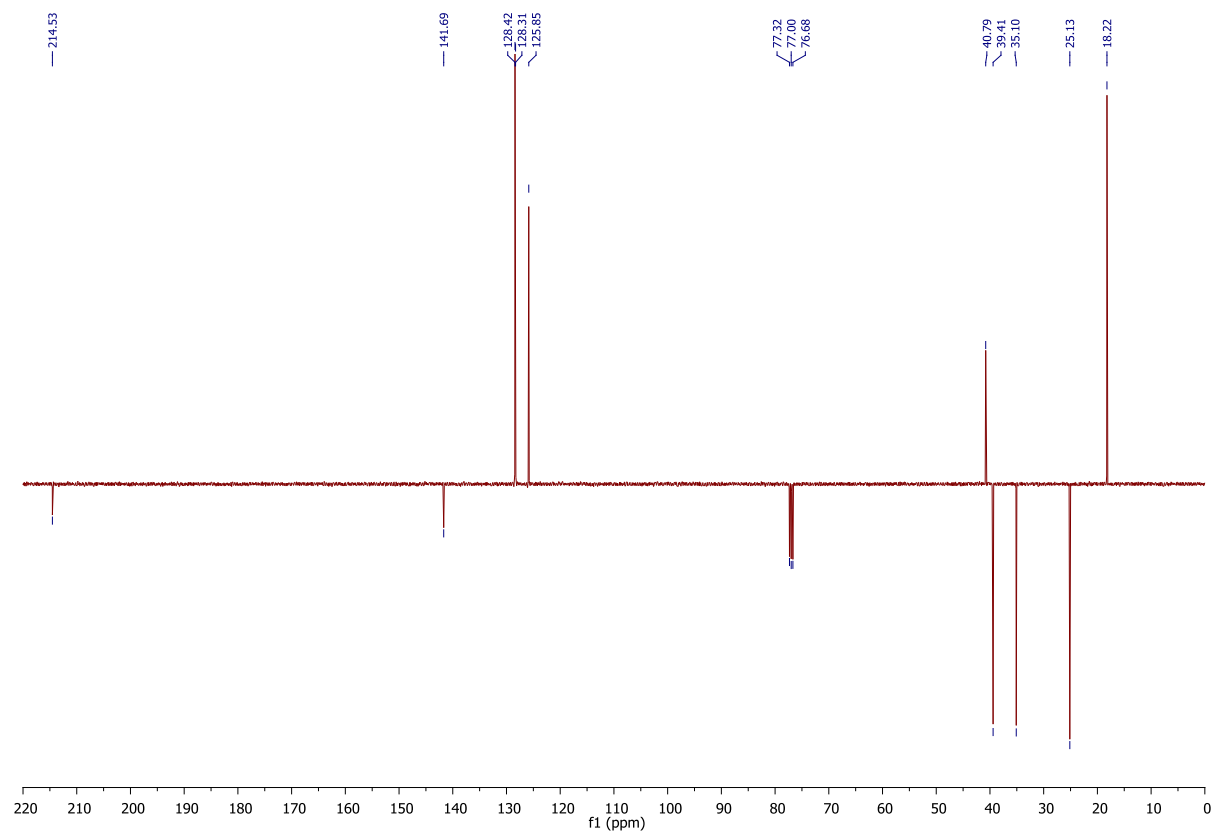

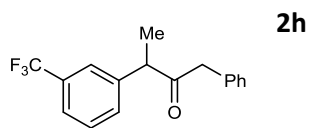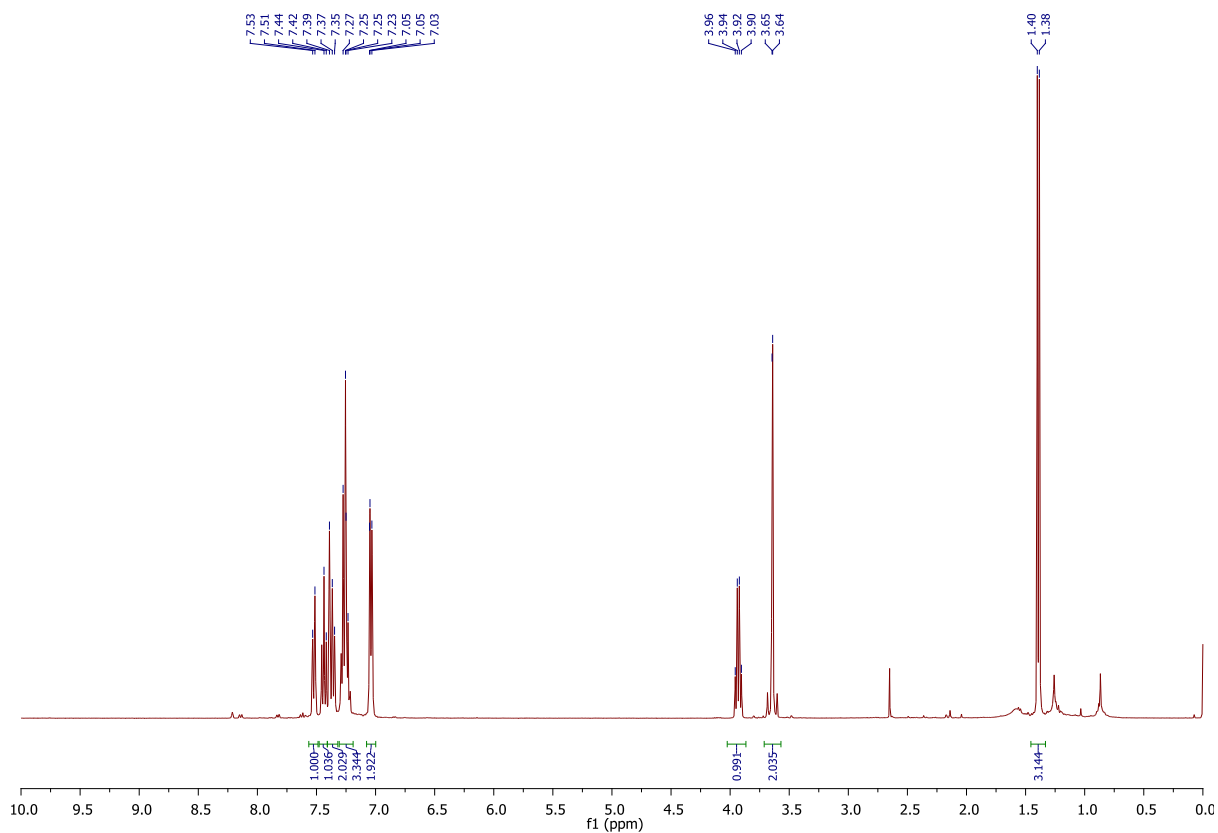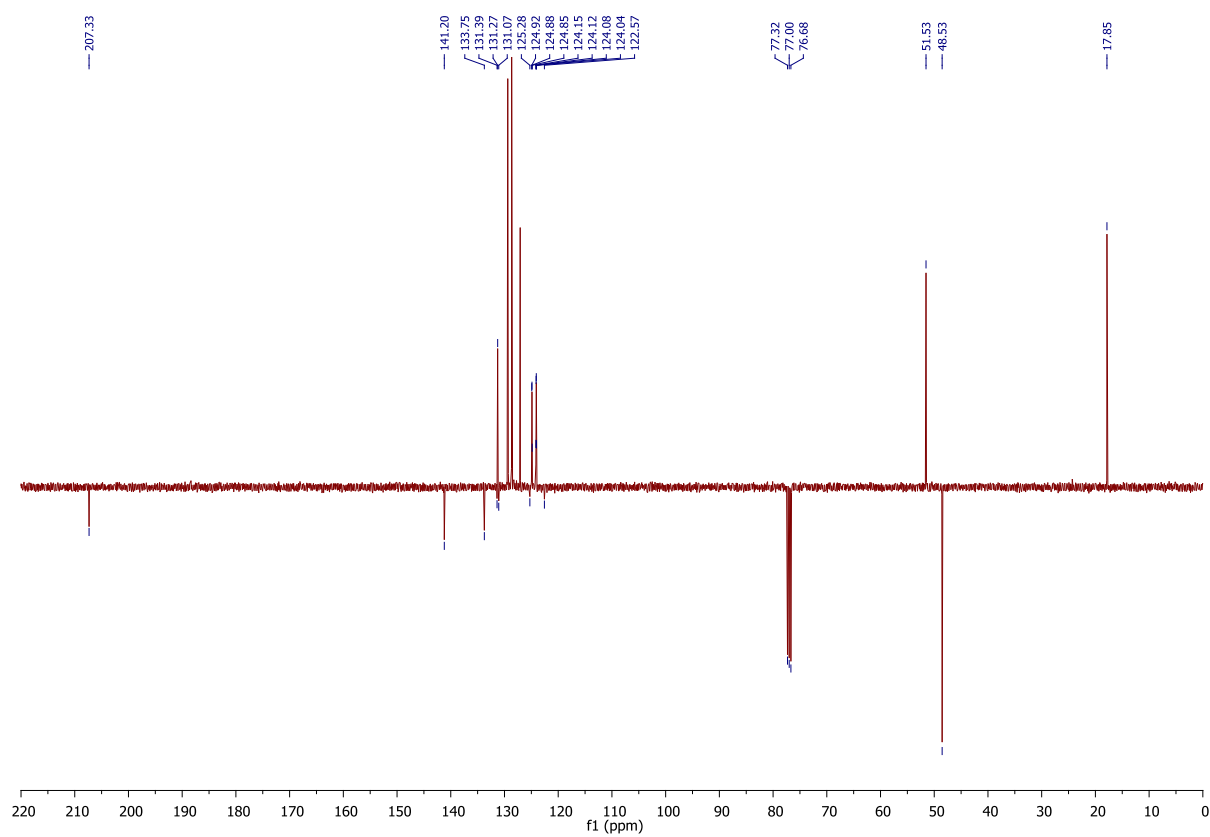



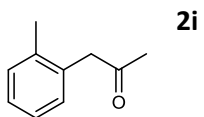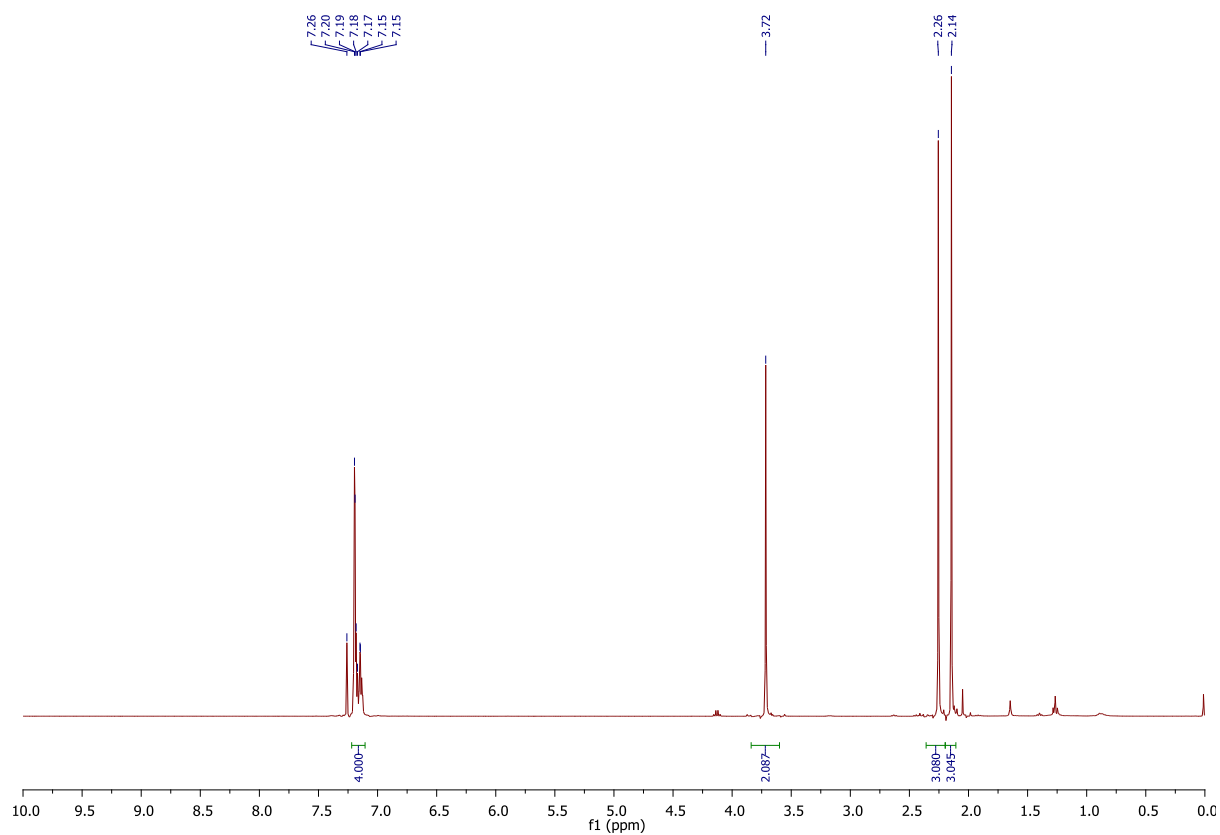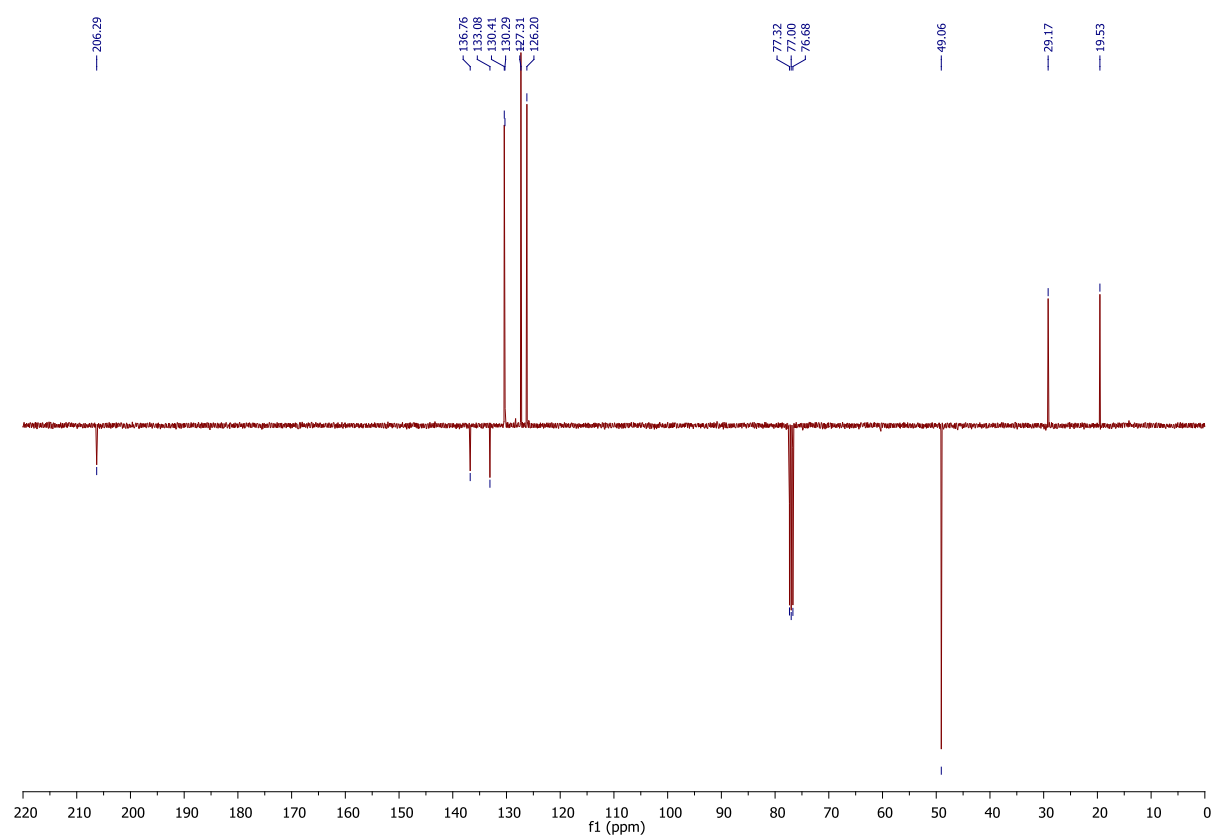

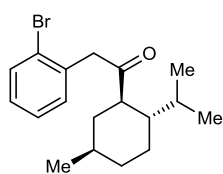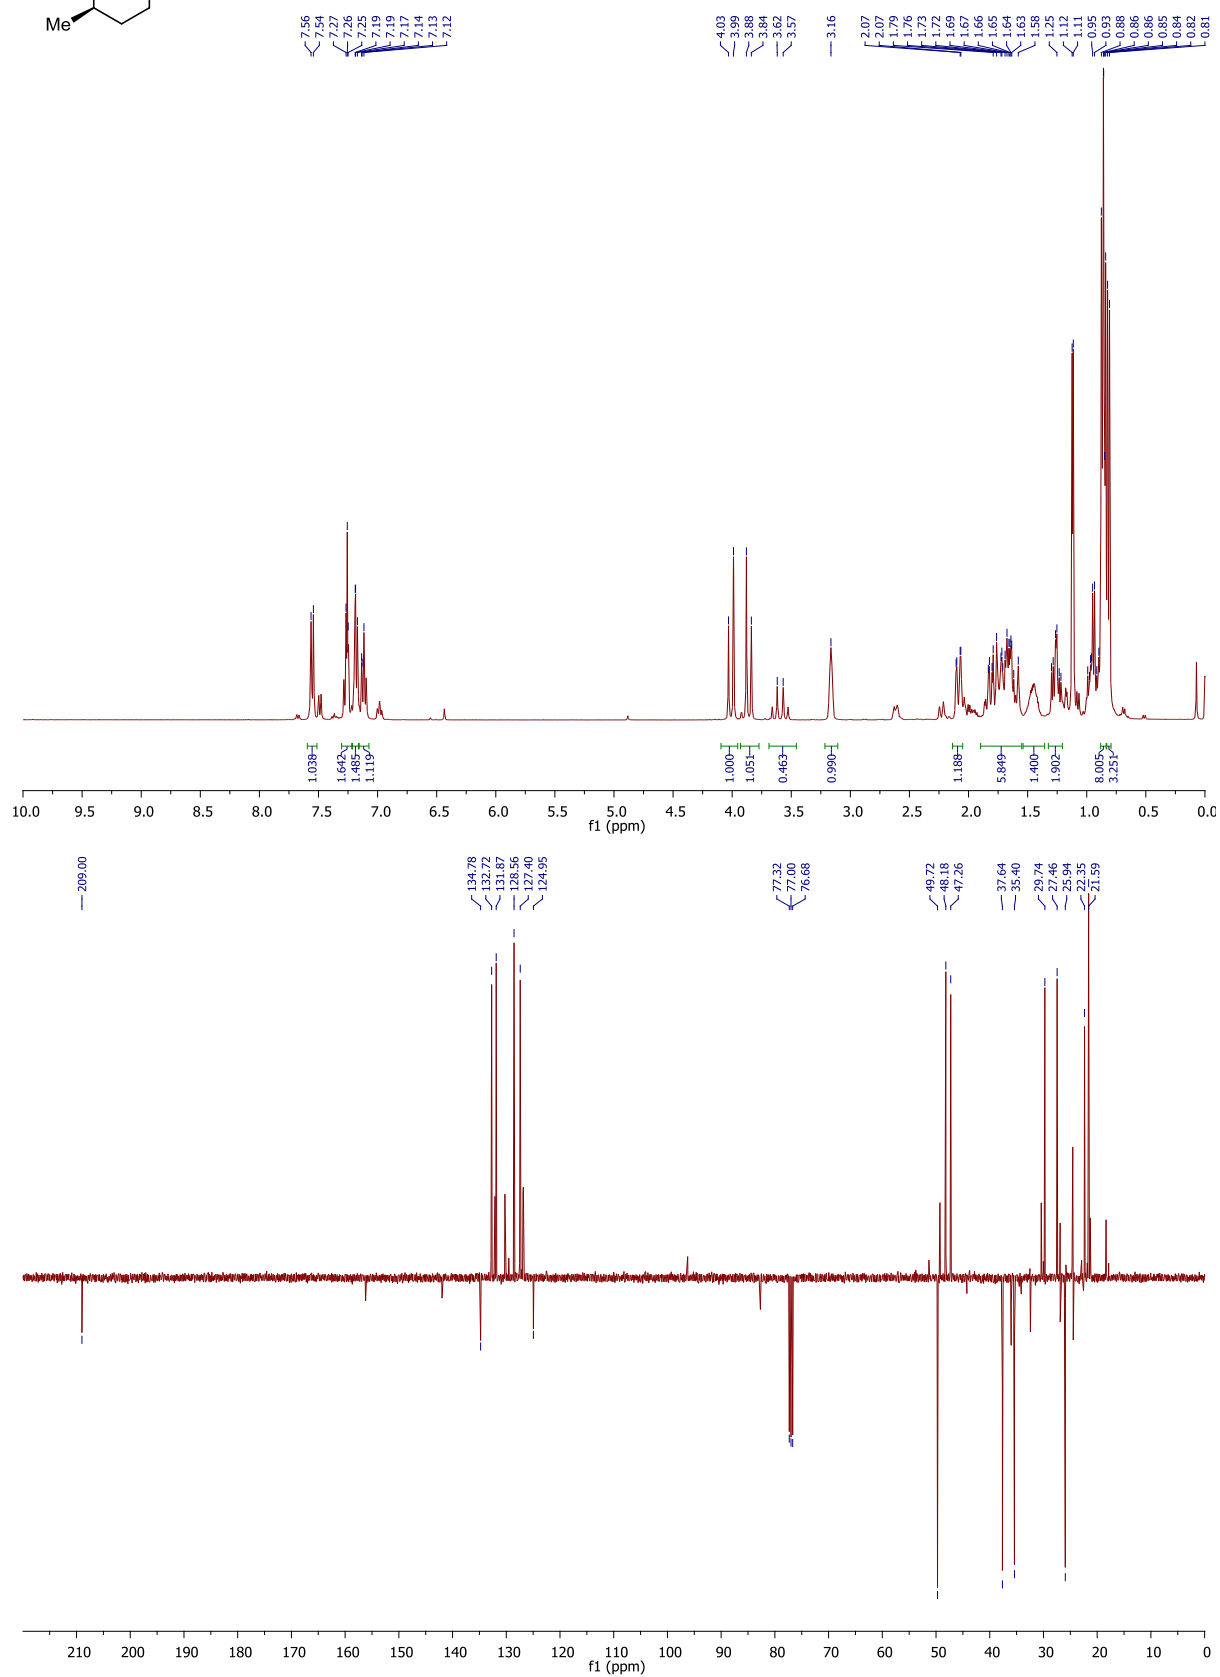

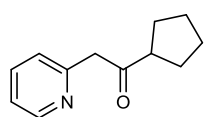

**2k**

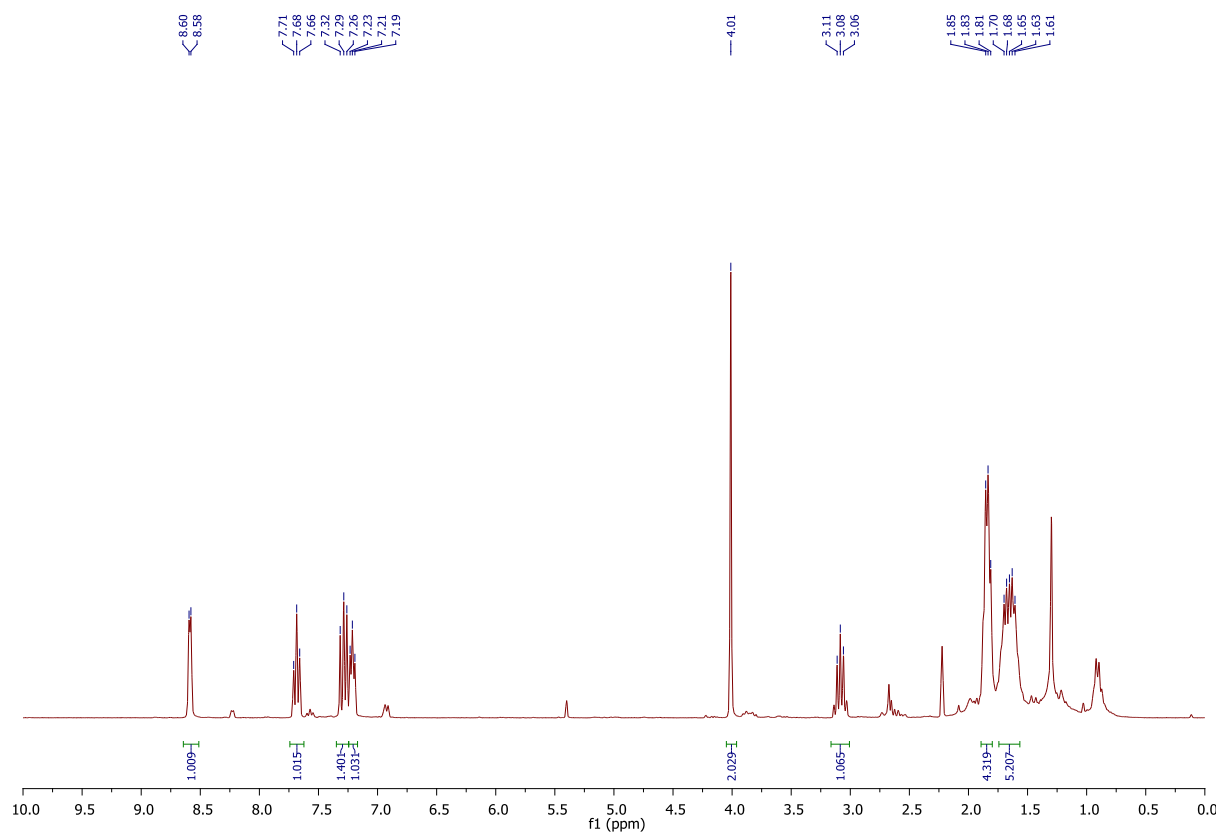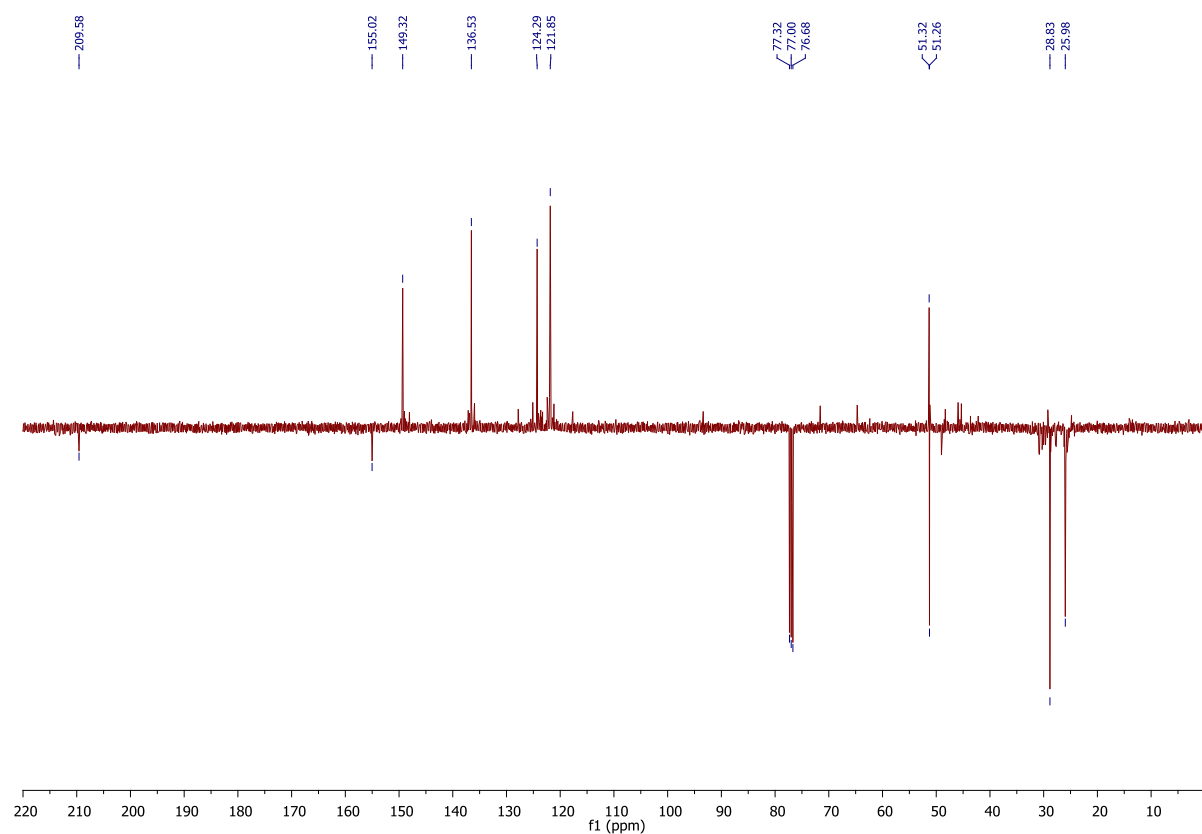

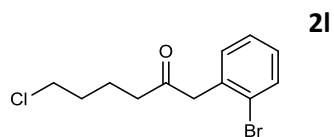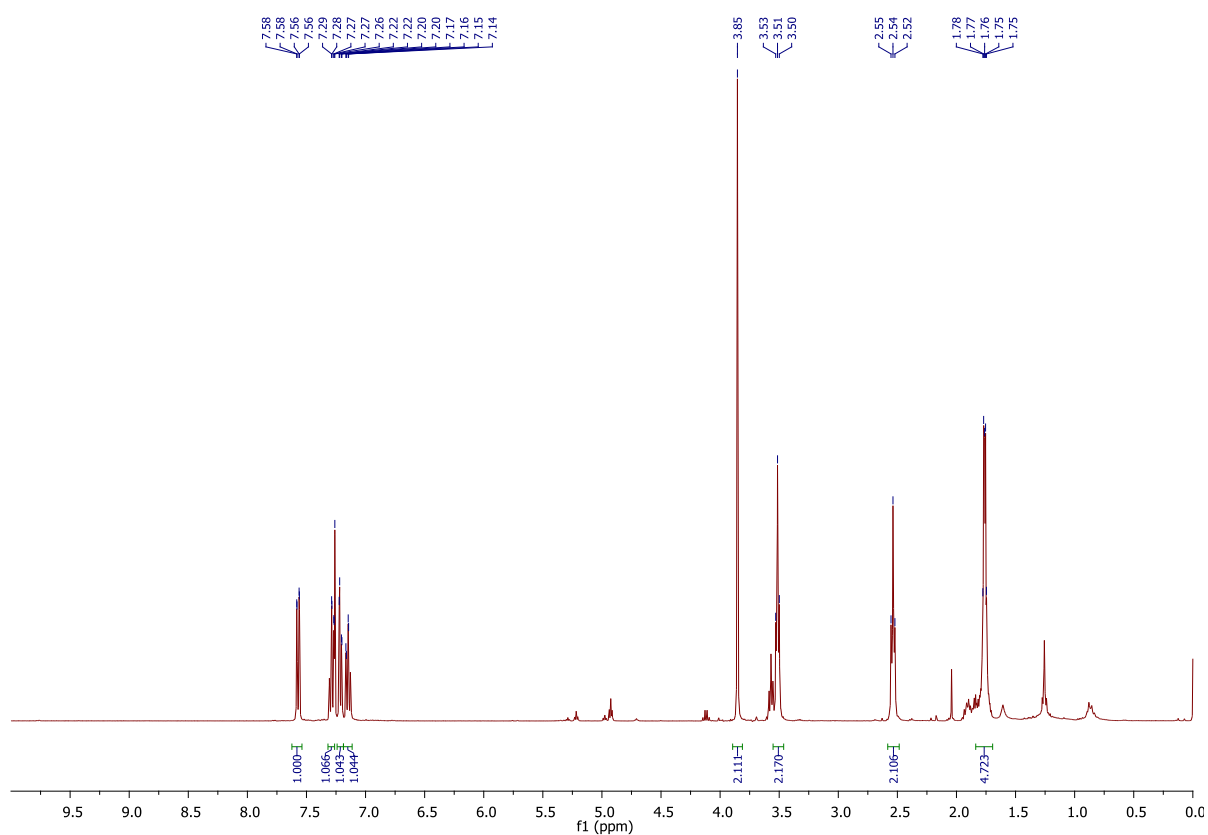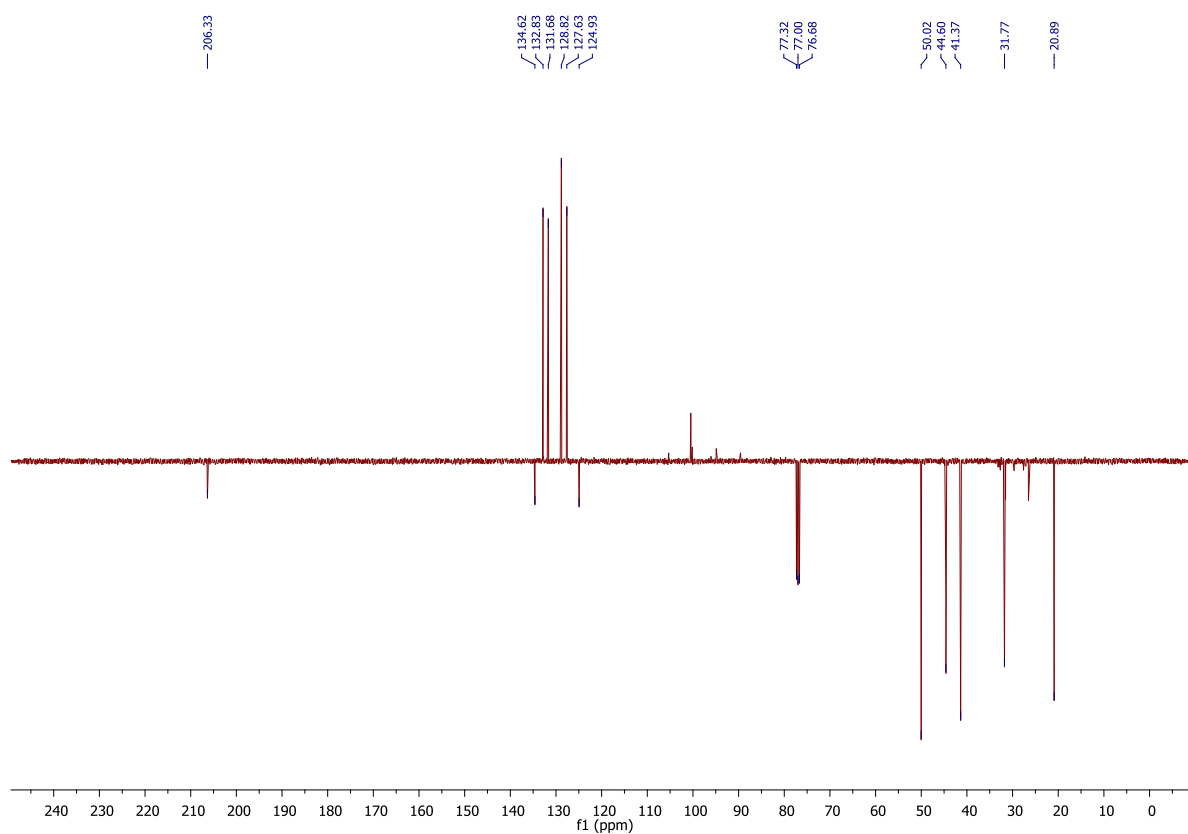

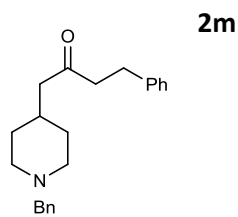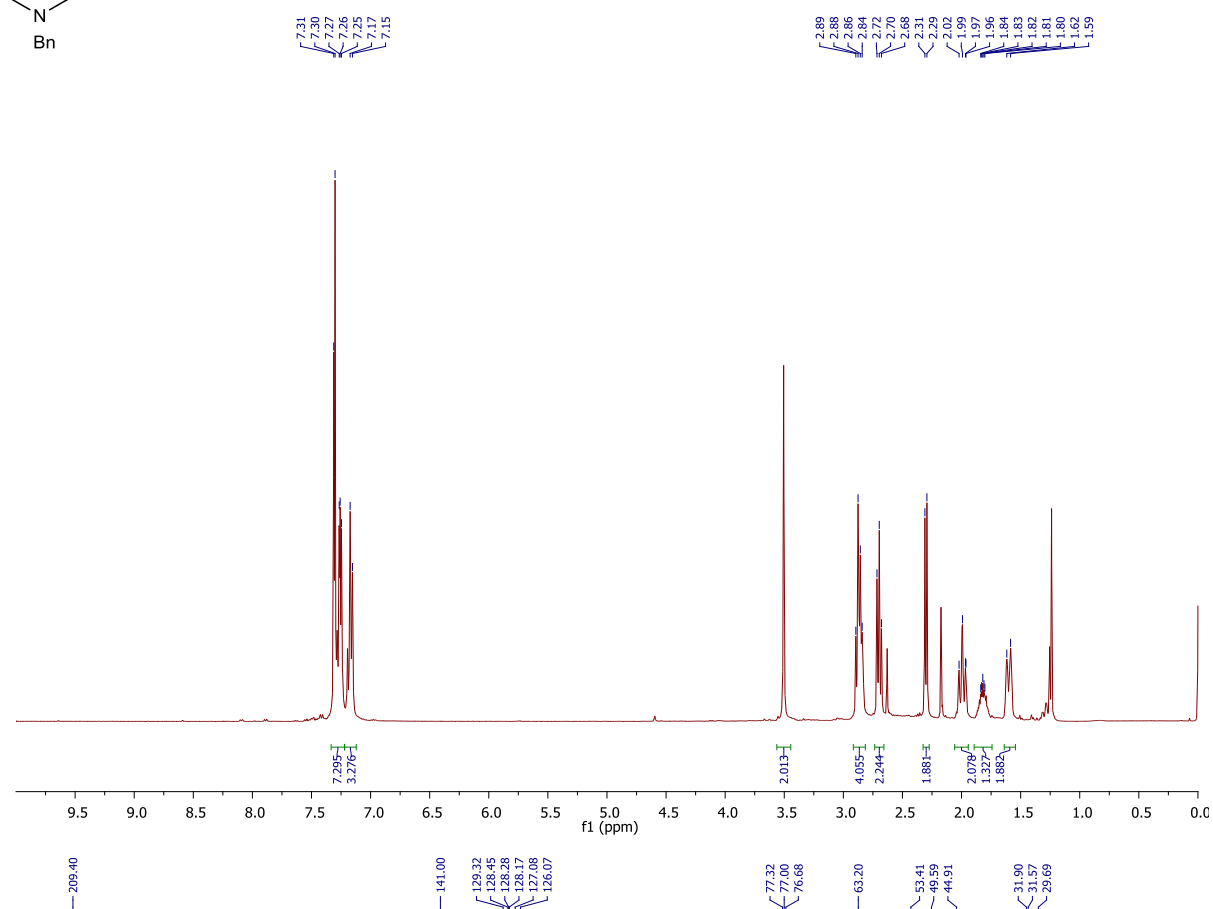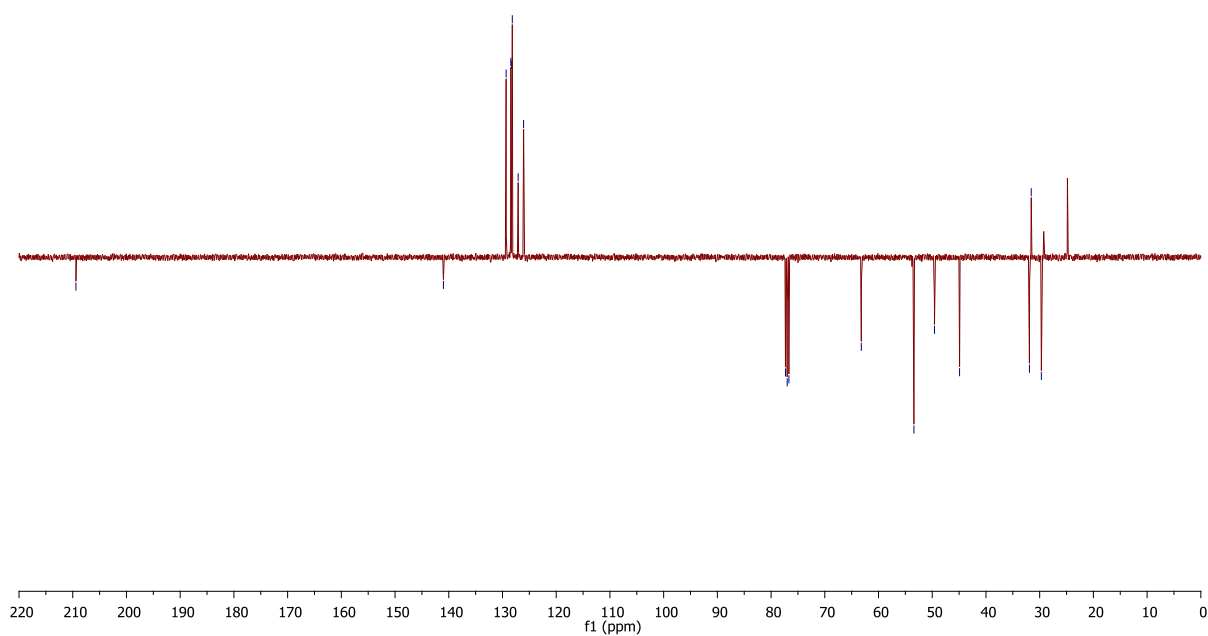

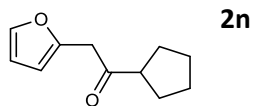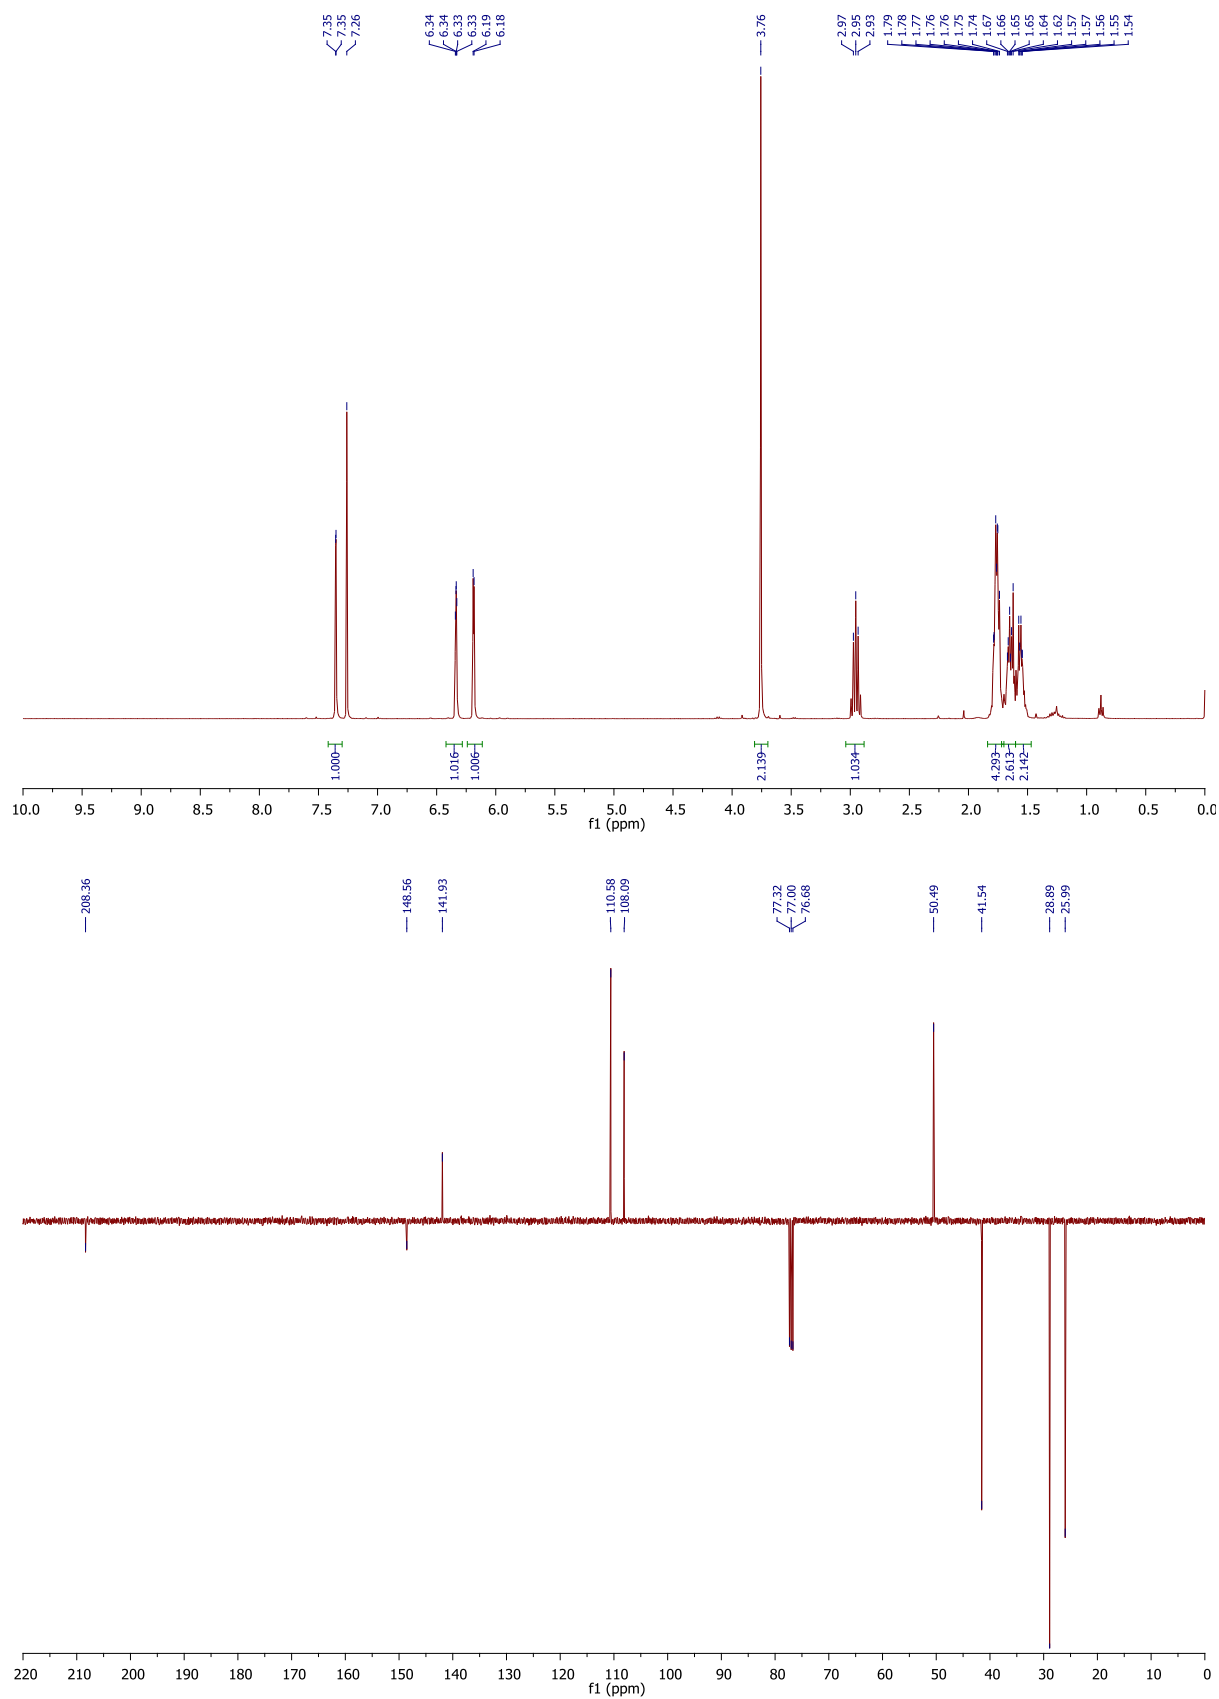

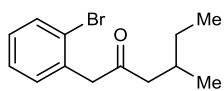

**2o**

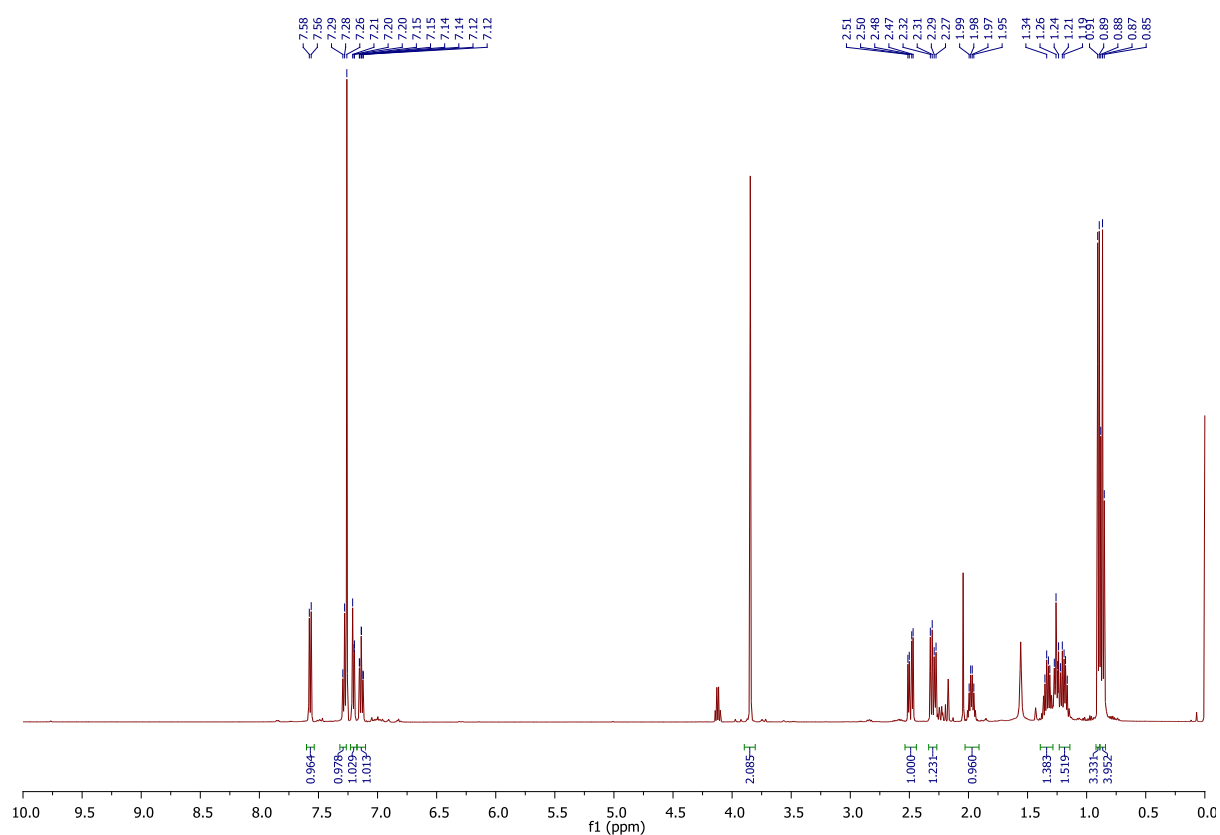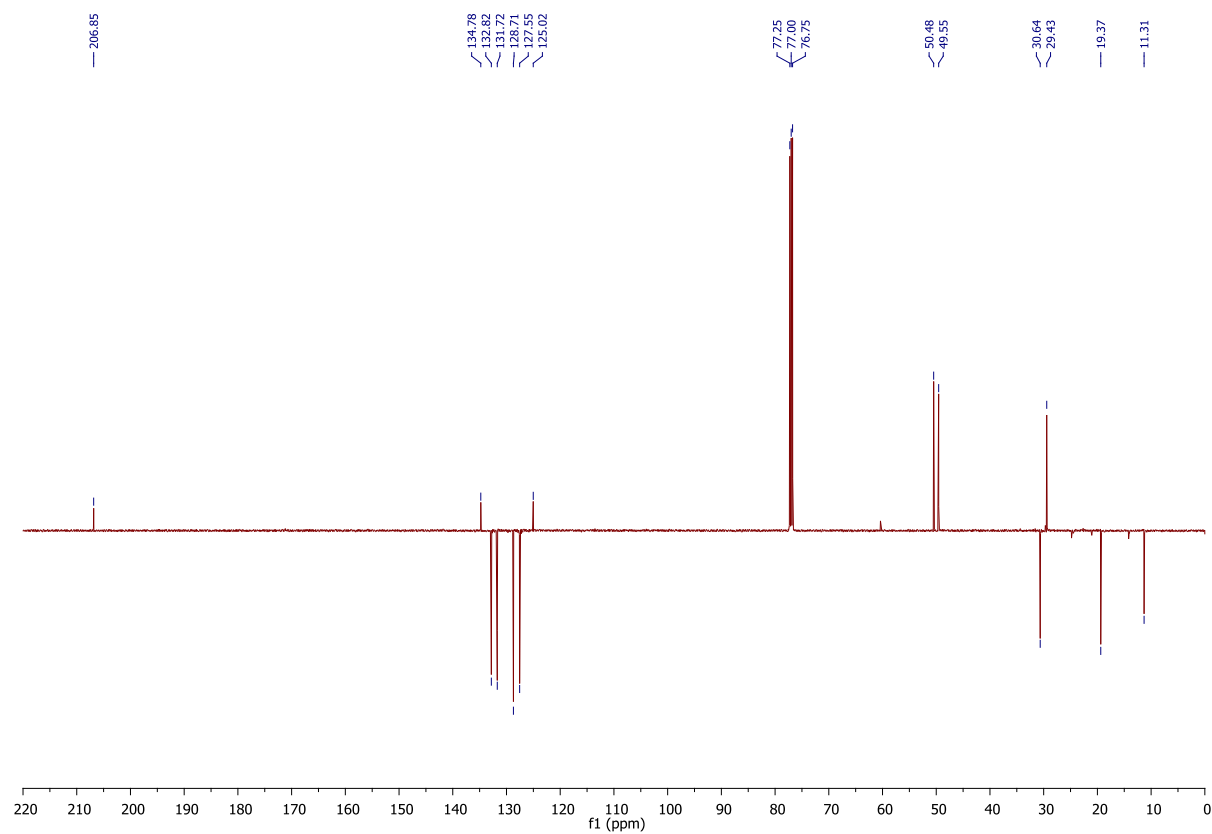

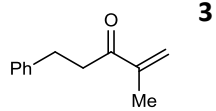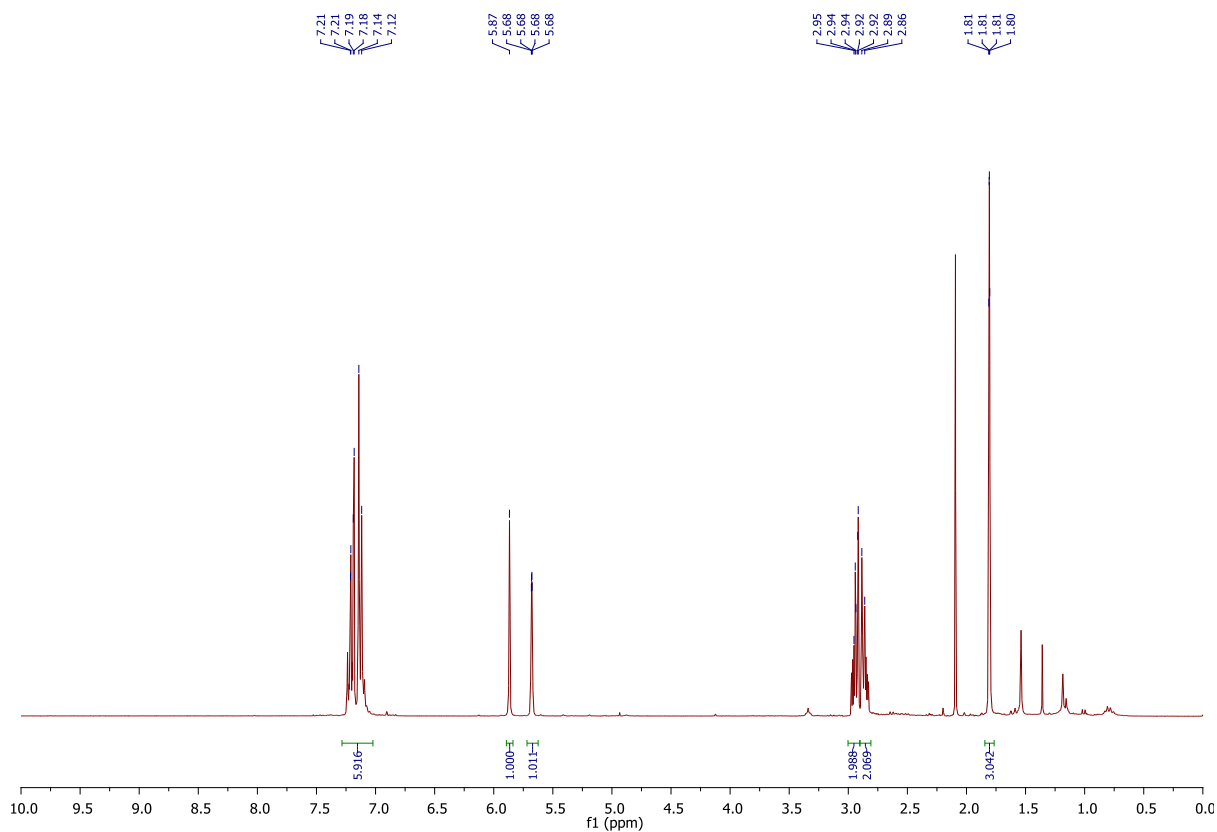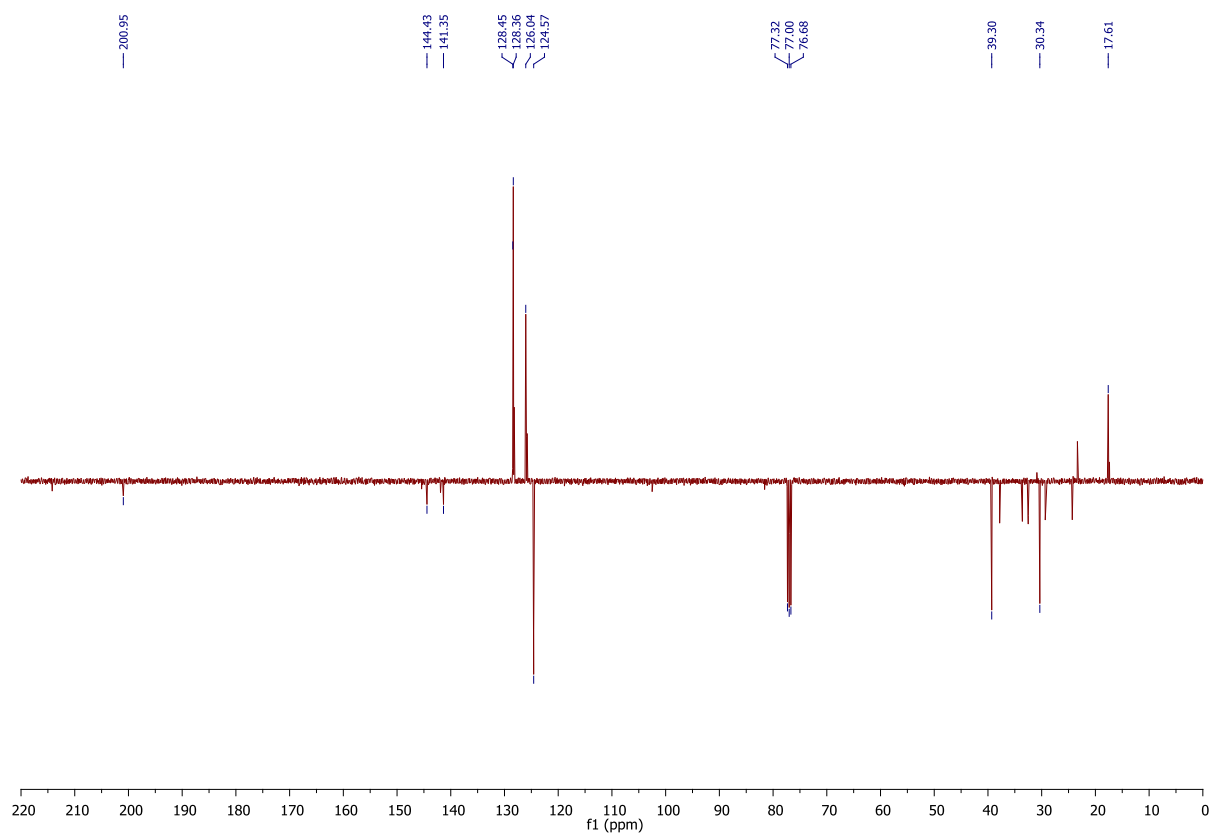



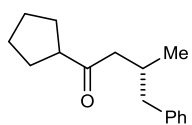

4

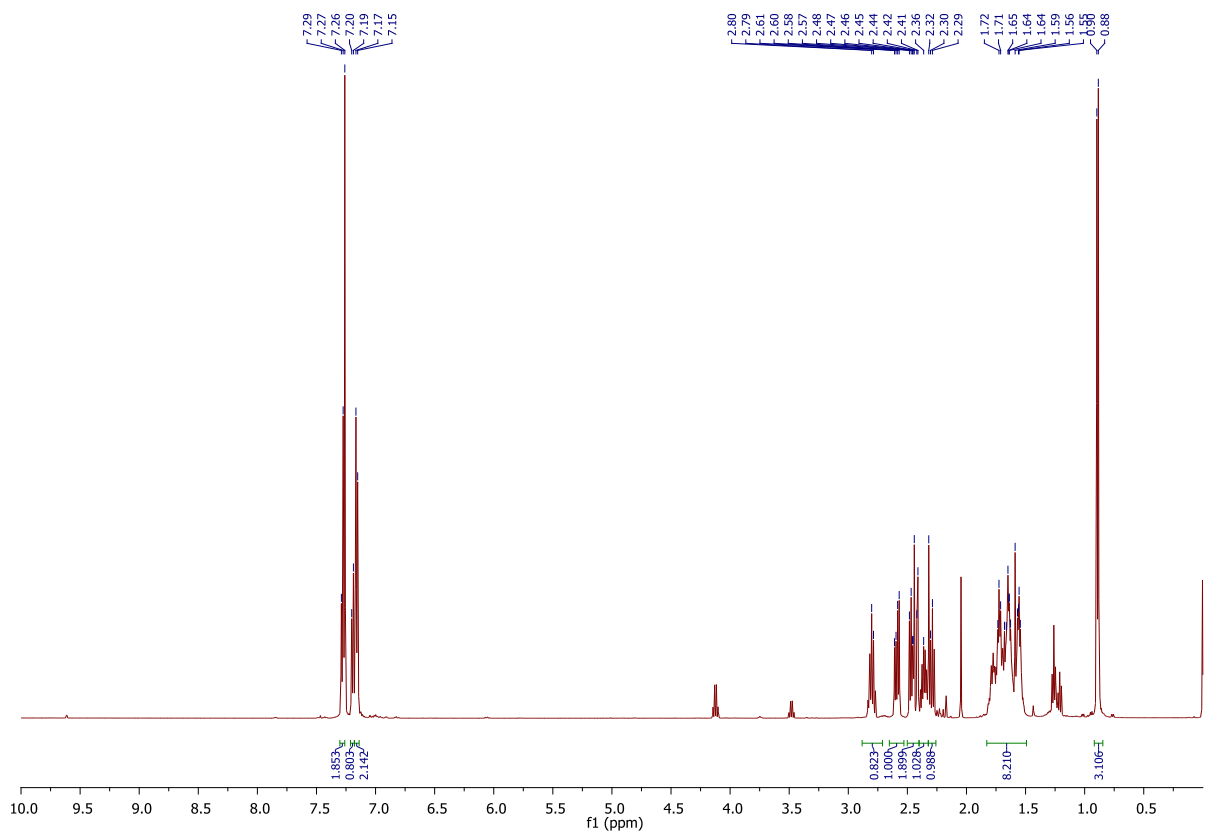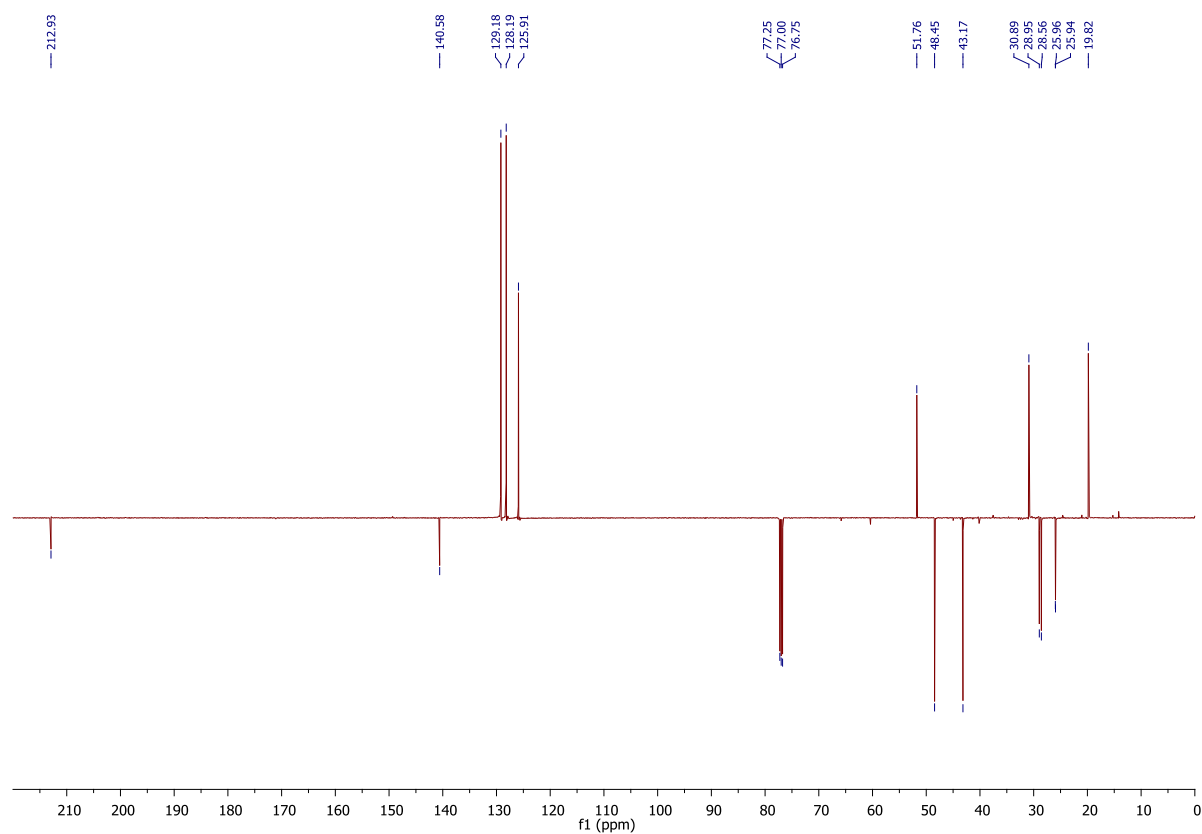

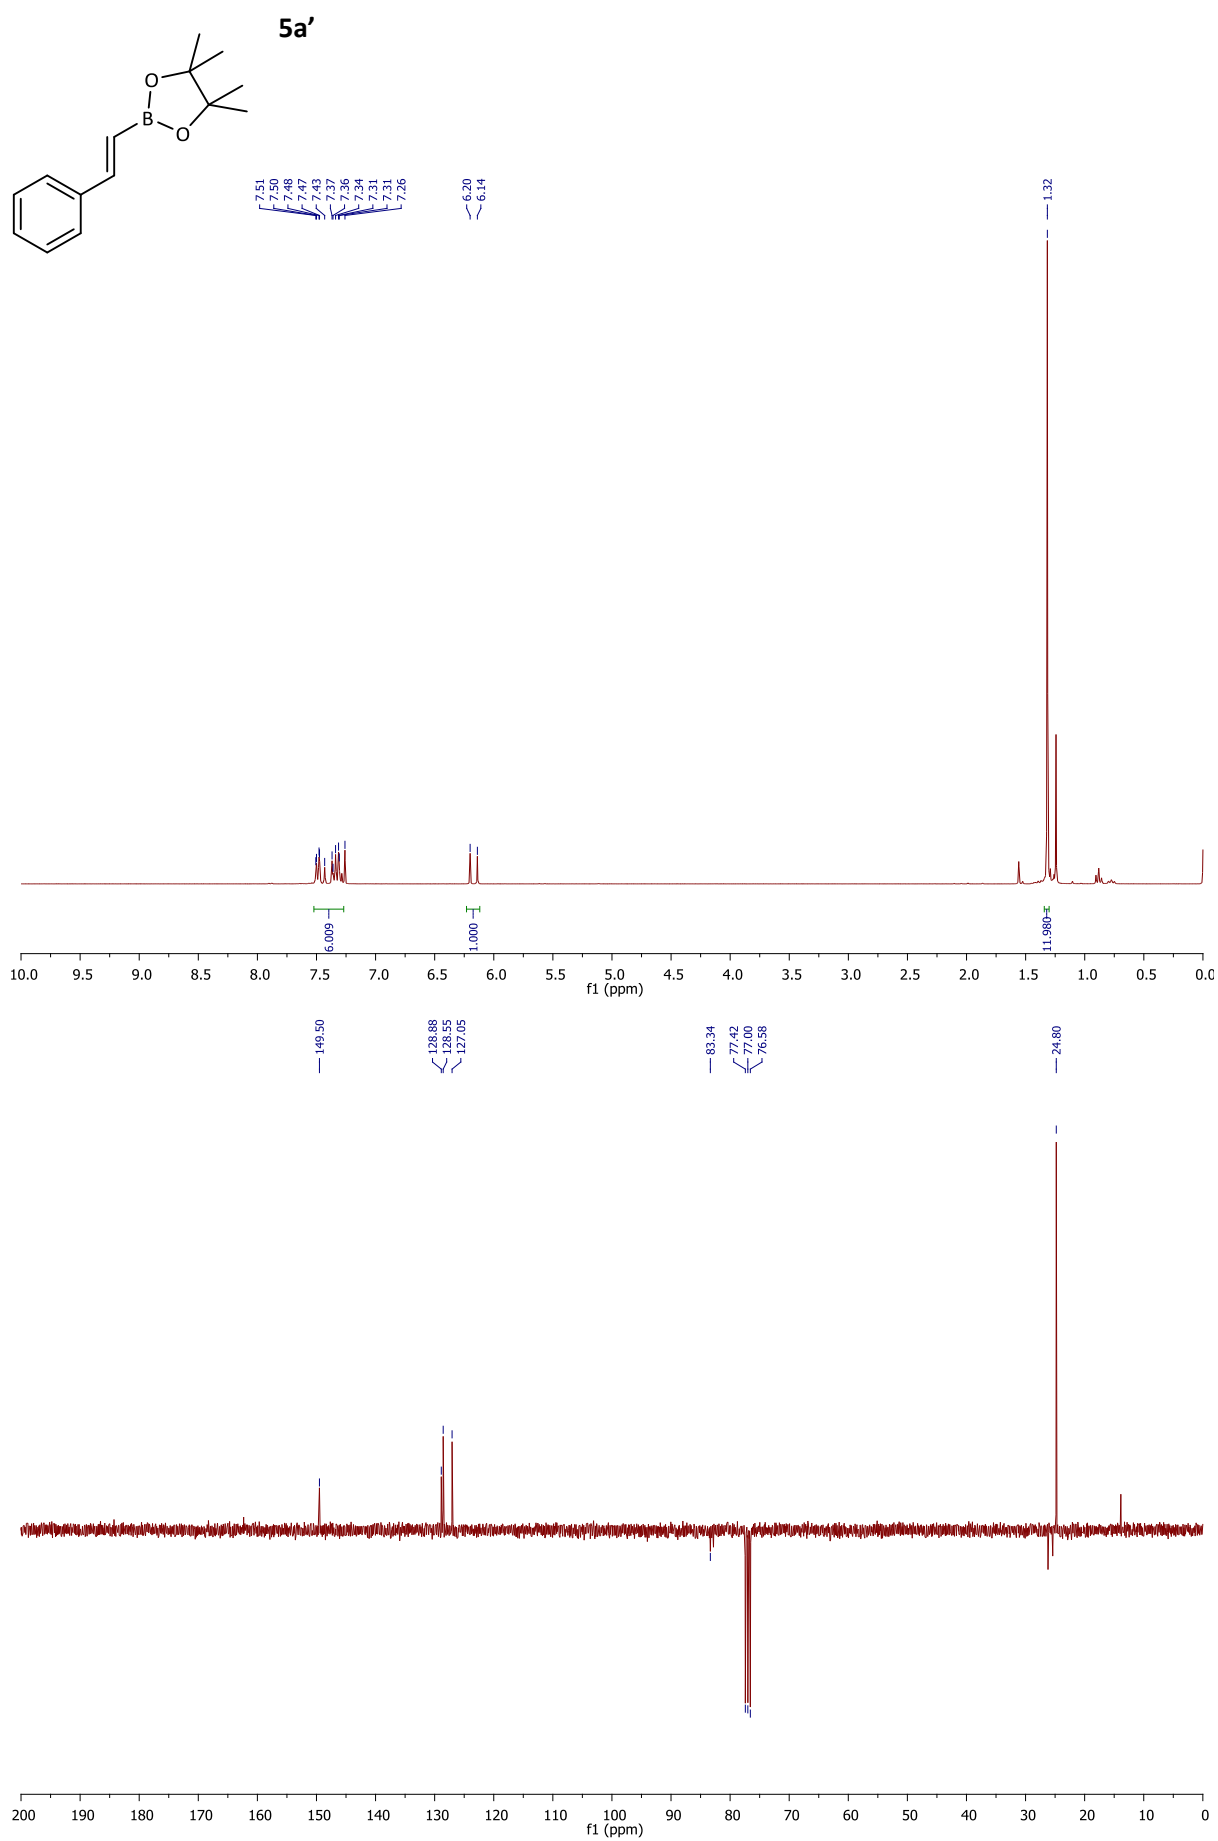

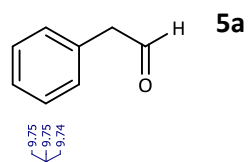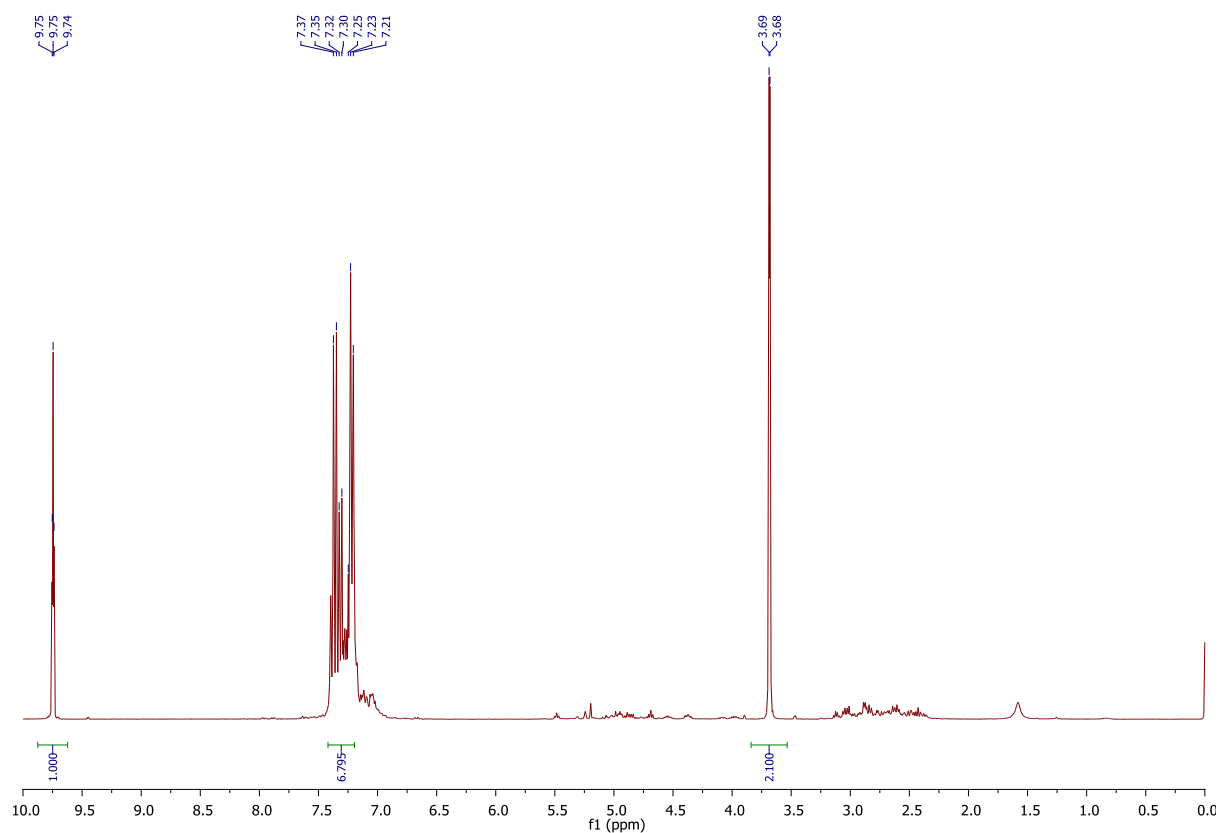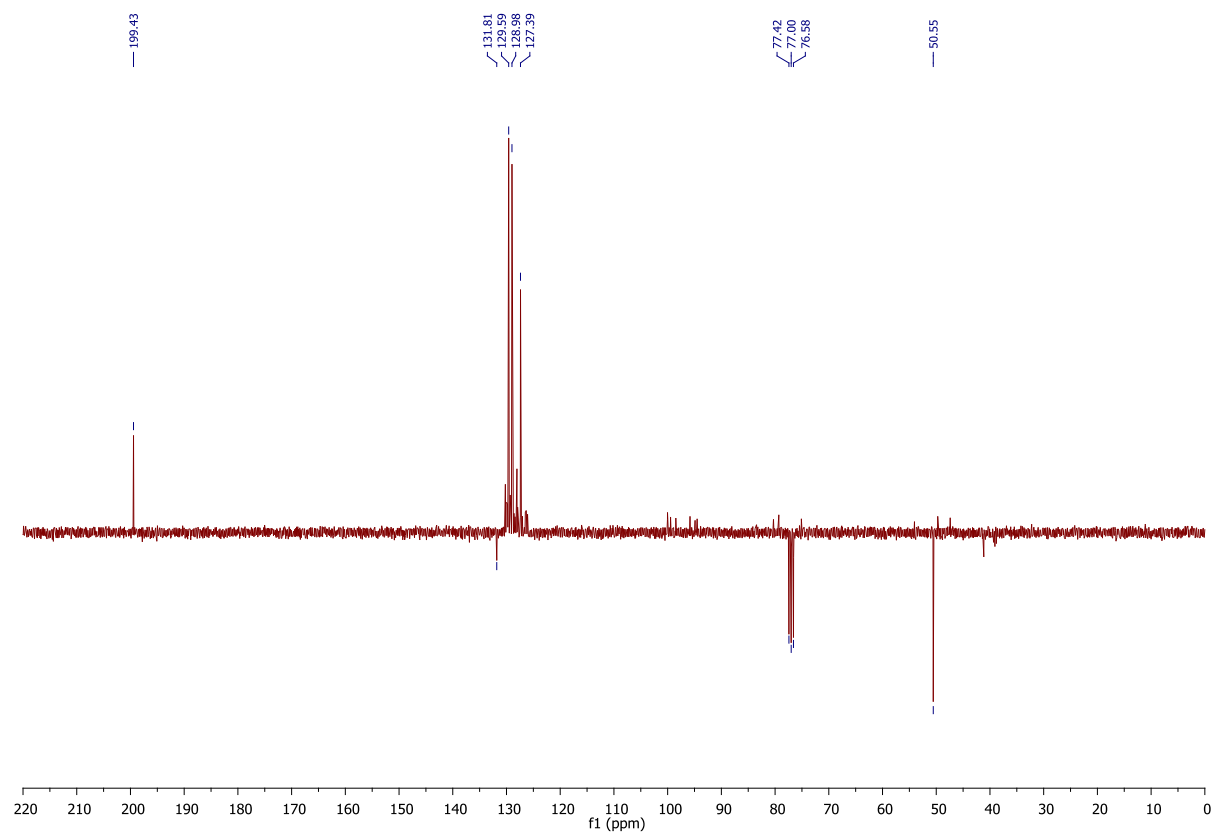

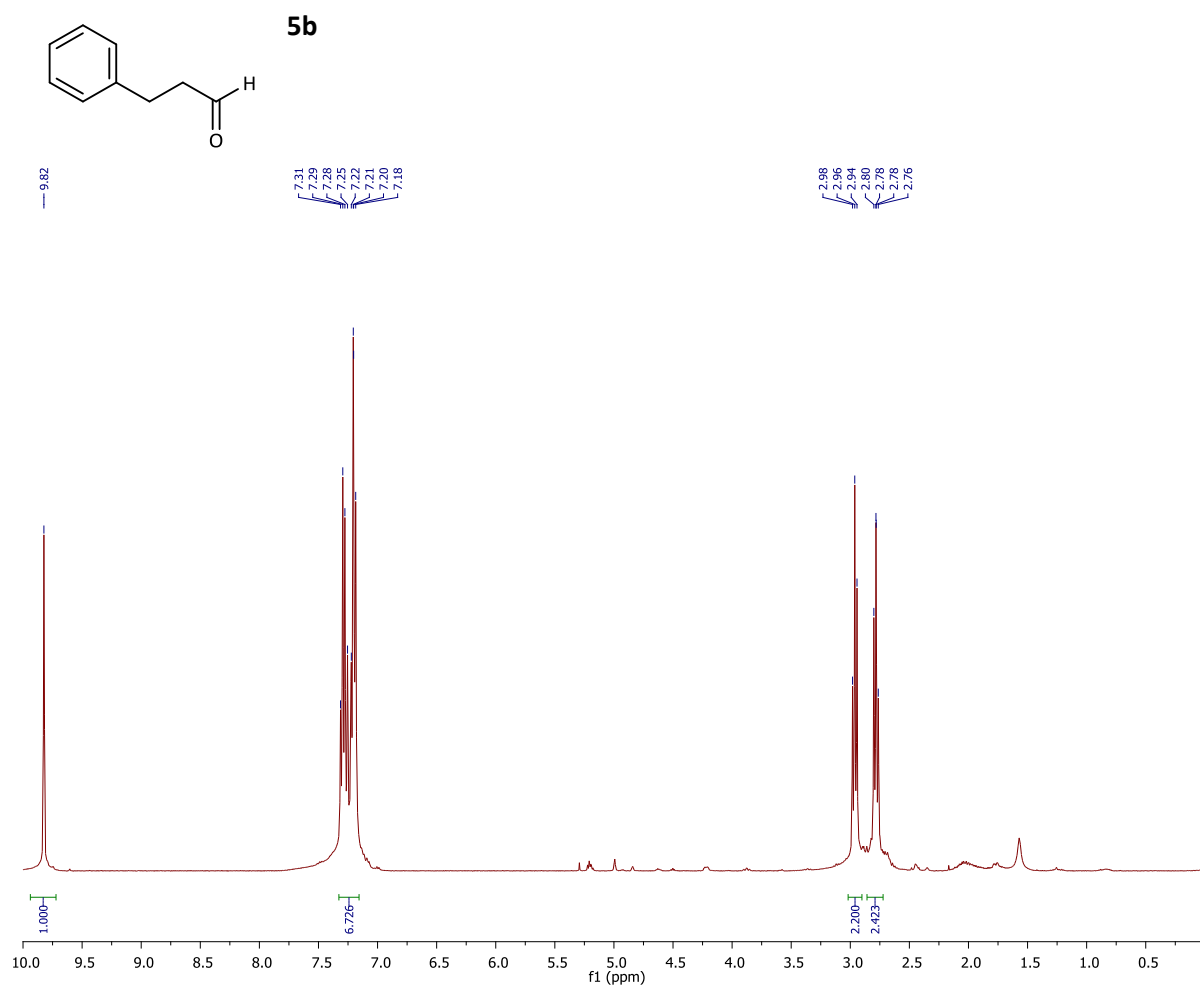

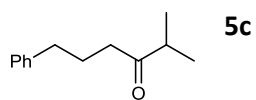

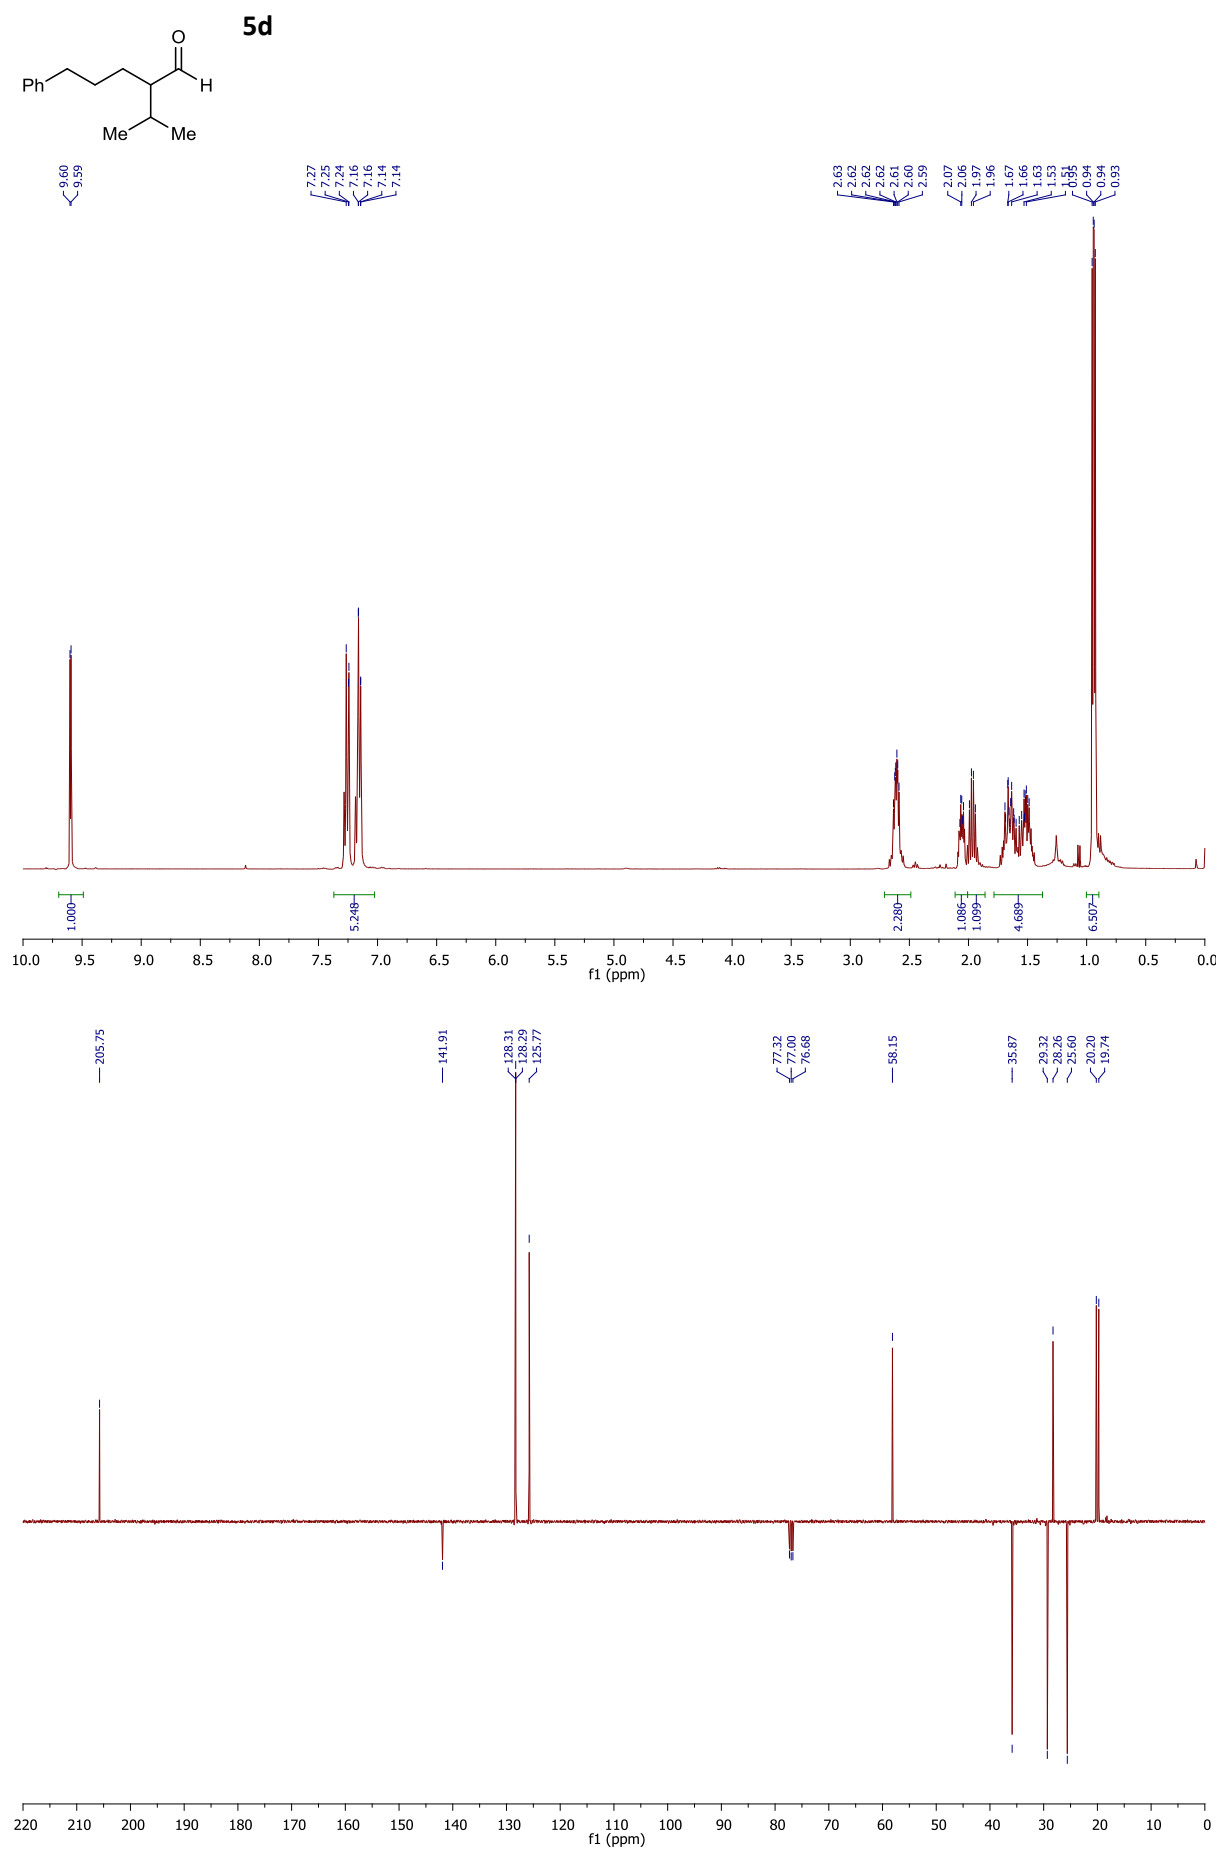

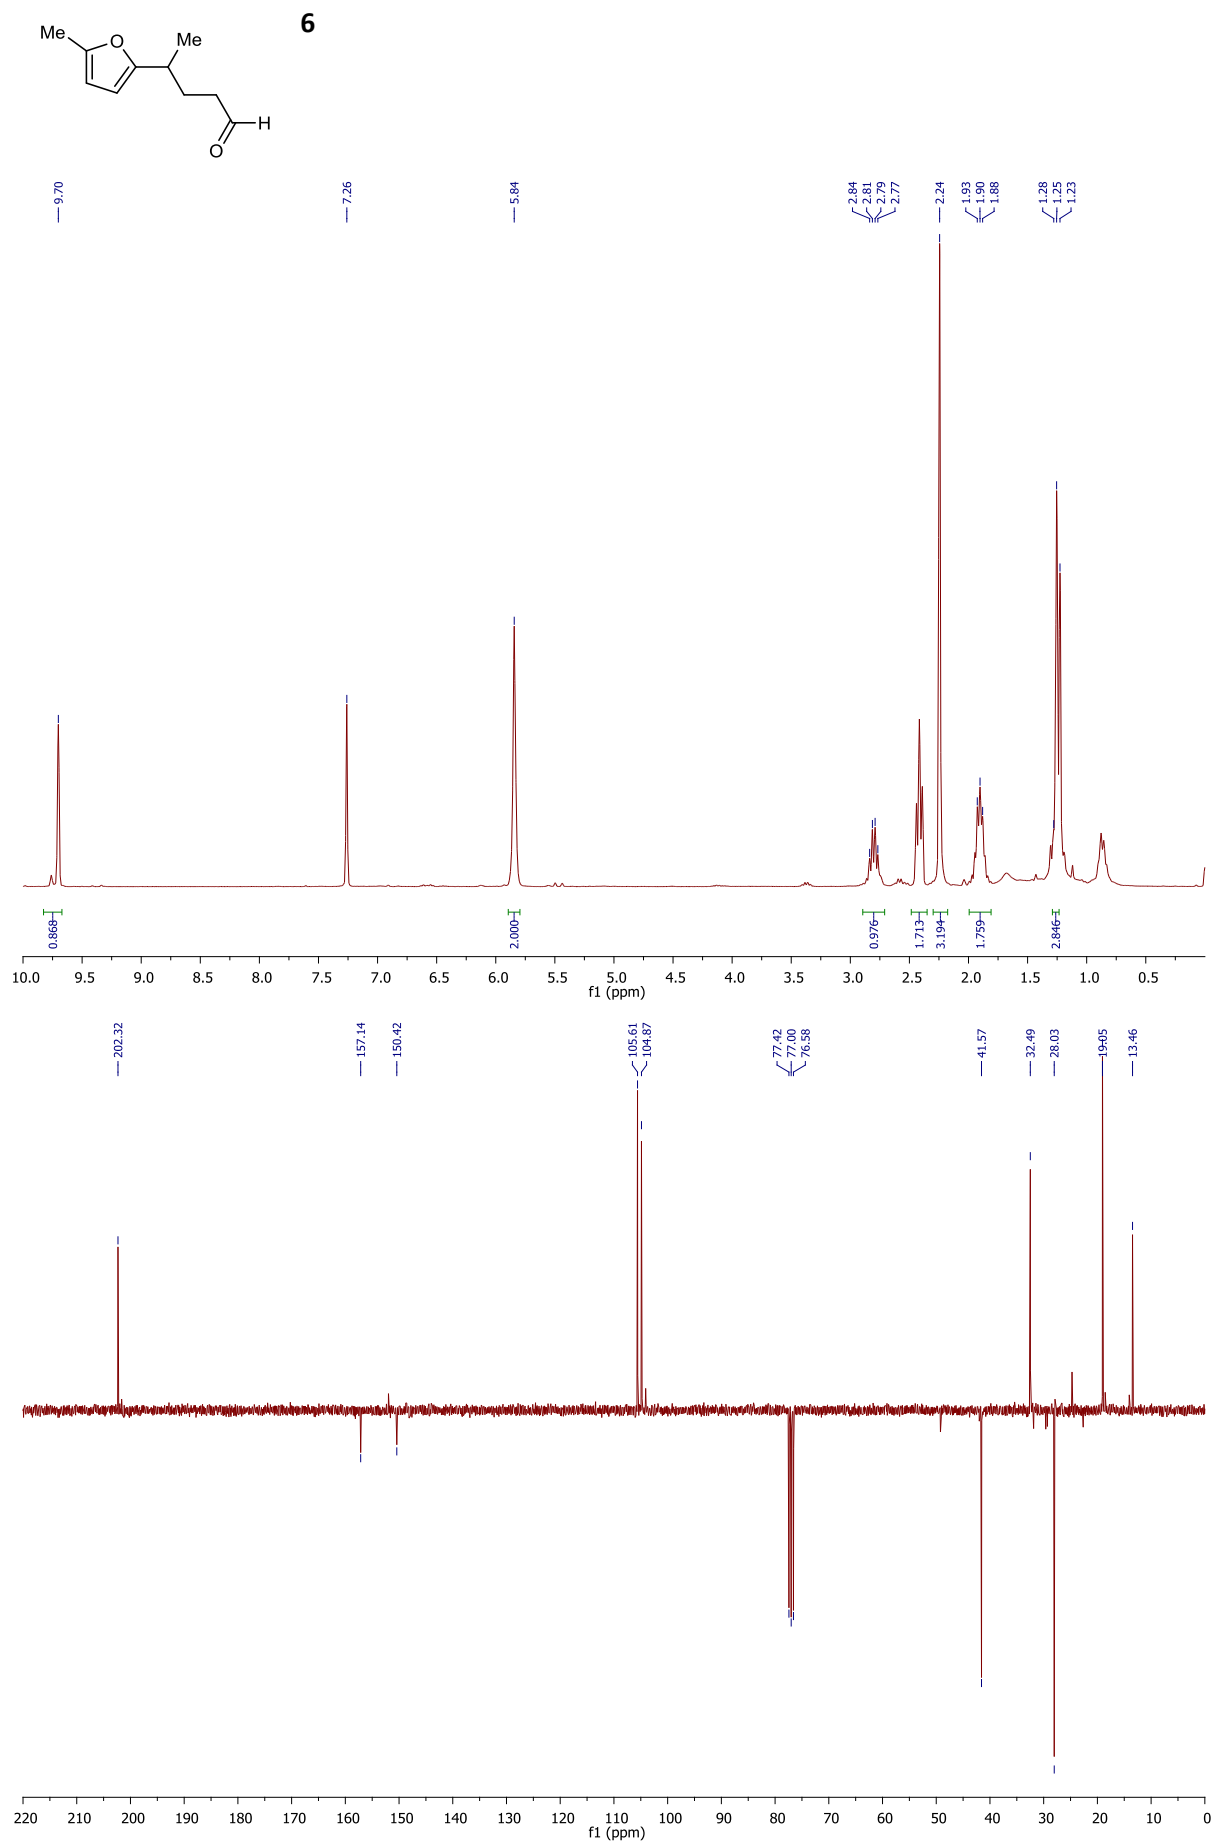

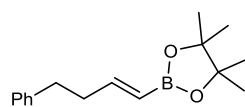

**7**

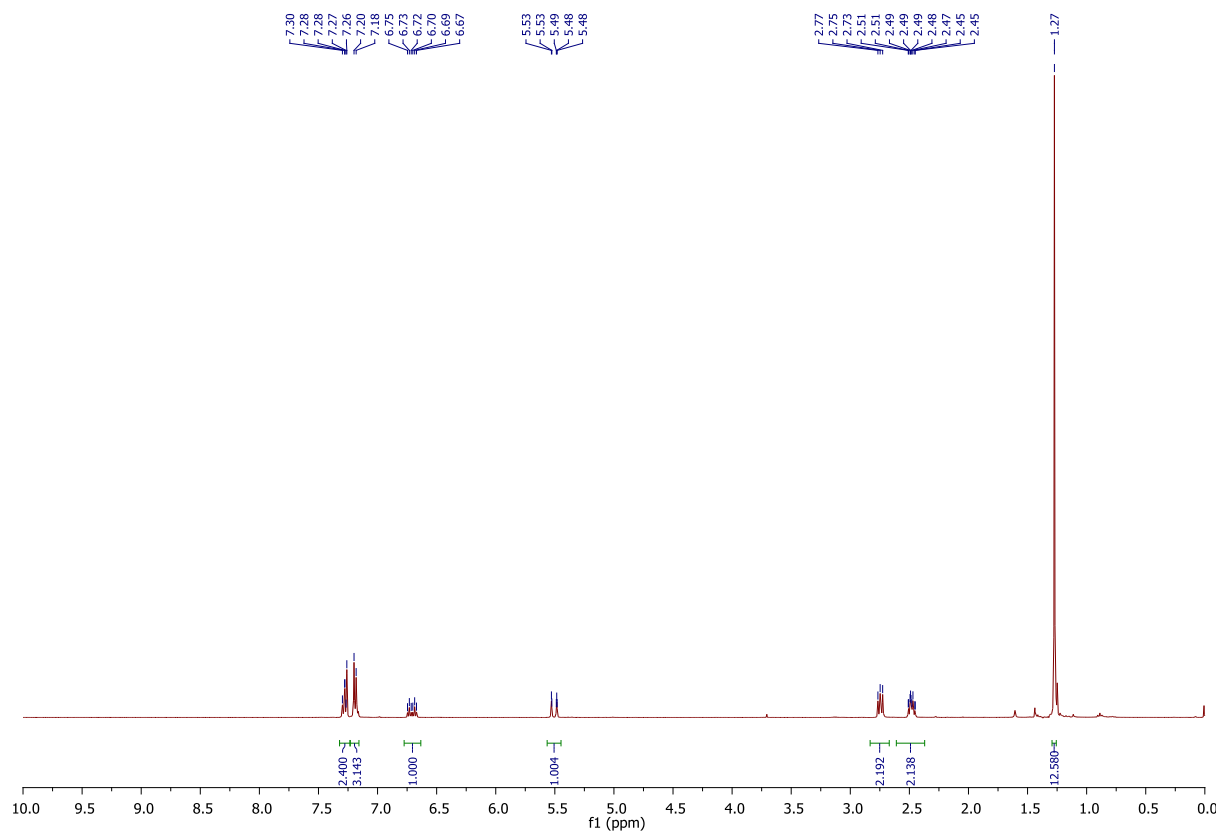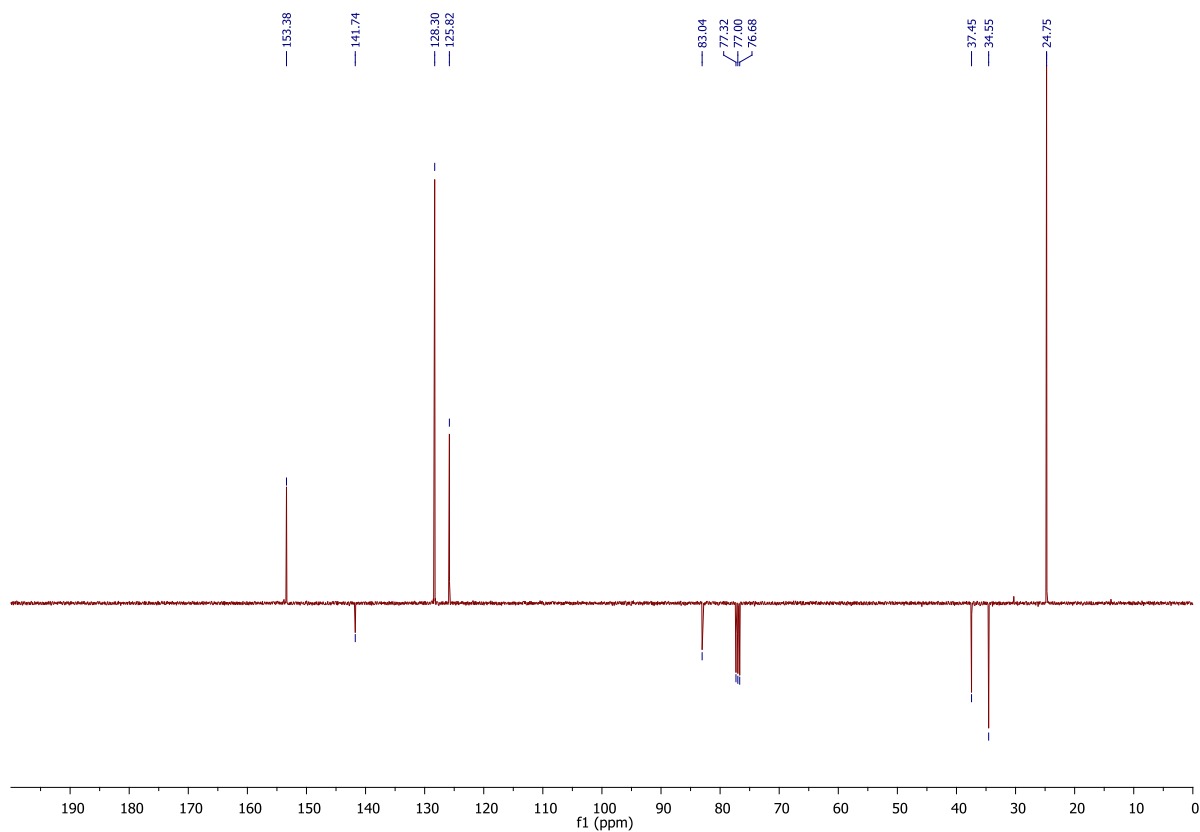



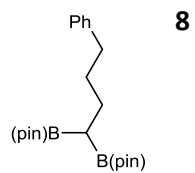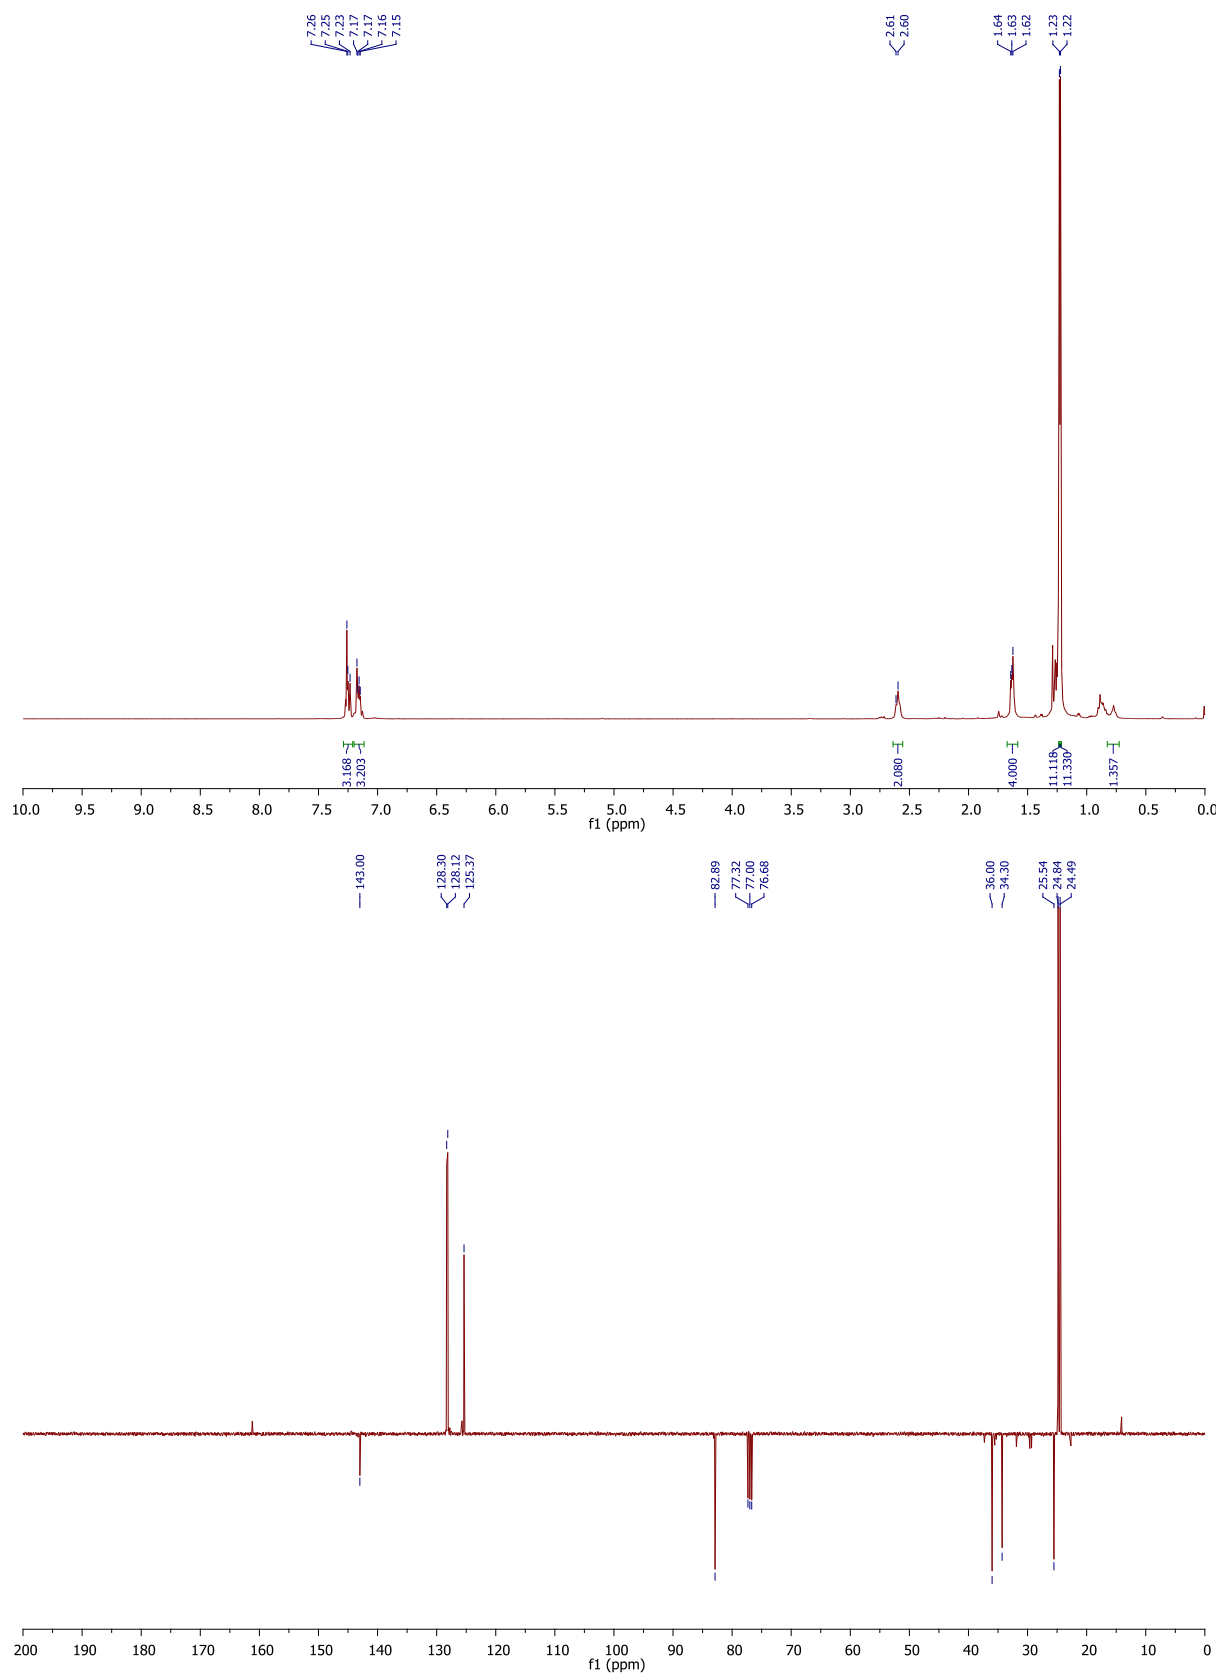

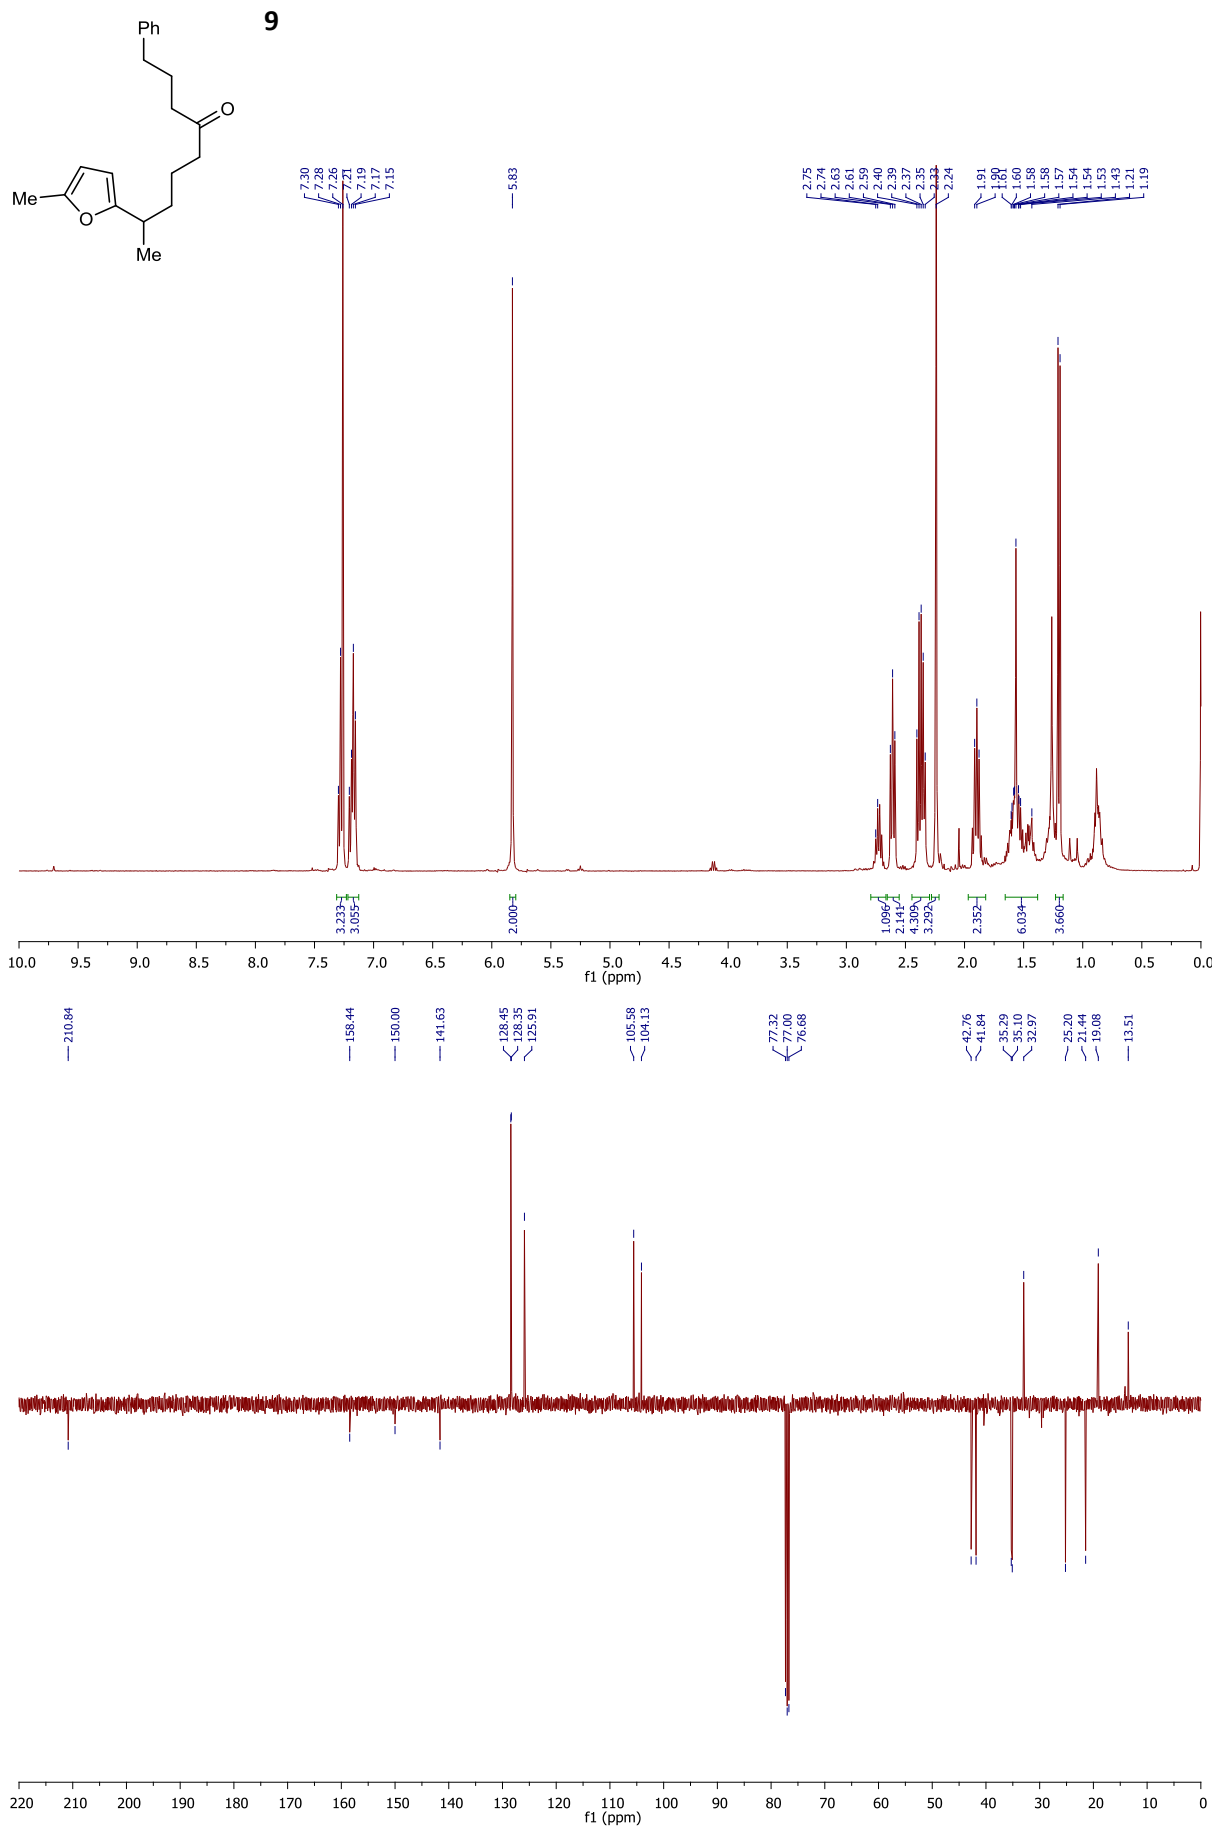

## HPLC analysis for enantioenriched homologative cross-coupling (compound 4)

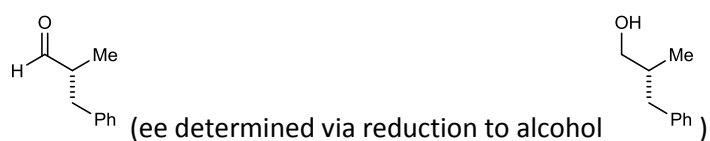

### Racemic

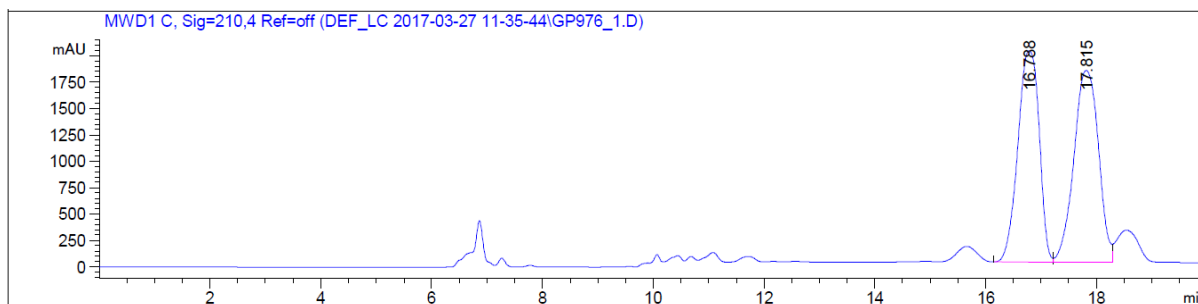

Signal 3: MWD1 C, Sig=210,4 Ref=off

| Peak # | RetTime [min] | Type | Width [min] | Area [mAU*s] | Height [mAU] | Area %  |
|--------|---------------|------|-------------|--------------|--------------|---------|
| 1      | 16.788        | BV   | 0.4261      | 5.36029e4    | 2003.68298   | 48.8088 |
| 2      | 17.815        | VV   | 0.4906      | 5.62193e4    | 1818.95410   | 51.1912 |

Totals : 1.09822e5 3822.63708

### Enantioenriched

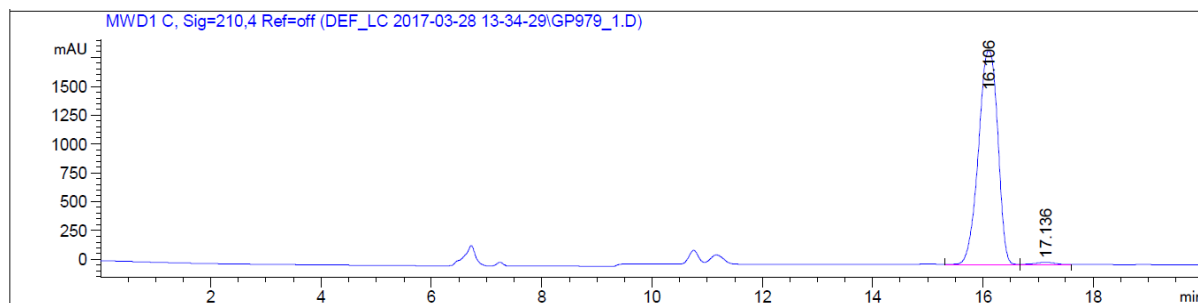

Signal 3: MWD1 C, Sig=210,4 Ref=off

| Peak # | RetTime [min] | Type | Width [min] | Area [mAU*s] | Height [mAU] | Area %  |
|--------|---------------|------|-------------|--------------|--------------|---------|
| 1      | 16.106        | VV   | 0.3847      | 4.49985e4    | 1857.30615   | 98.9117 |
| 2      | 17.136        | VB   | 0.4125      | 495.10760    | 18.96846     | 1.0883  |

Totals : 4.54937e4 1876.27461

**Enantiomeric excess = 98%**

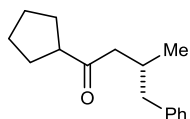

## Racemic

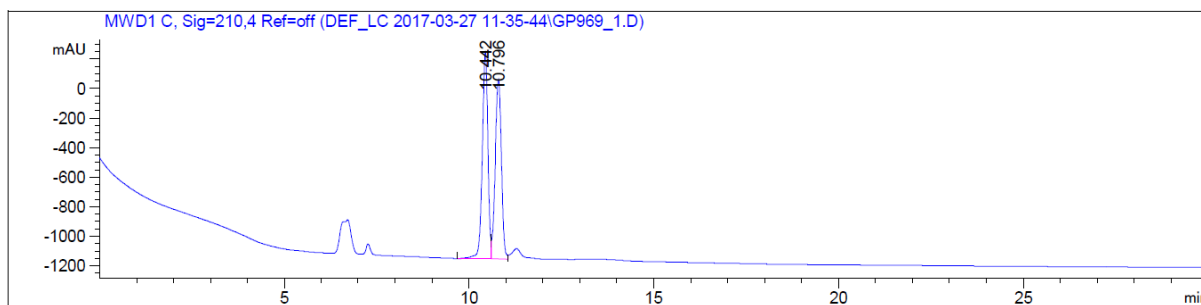

Signal 3: MWD1 C, Sig=210,4 Ref=off

| Peak # | RetTime [min] | Type | Width [min] | Area [mAU*s] | Height [mAU] | Area %  |
|--------|---------------|------|-------------|--------------|--------------|---------|
| 1      | 10.442        | BV   | 0.1665      | 1.50503e4    | 1409.99048   | 51.6538 |
| 2      | 10.796        | VV   | 0.1809      | 1.40866e4    | 1218.03223   | 48.3462 |

Totals : 2.91368e4 2628.02271

## Enantioenriched

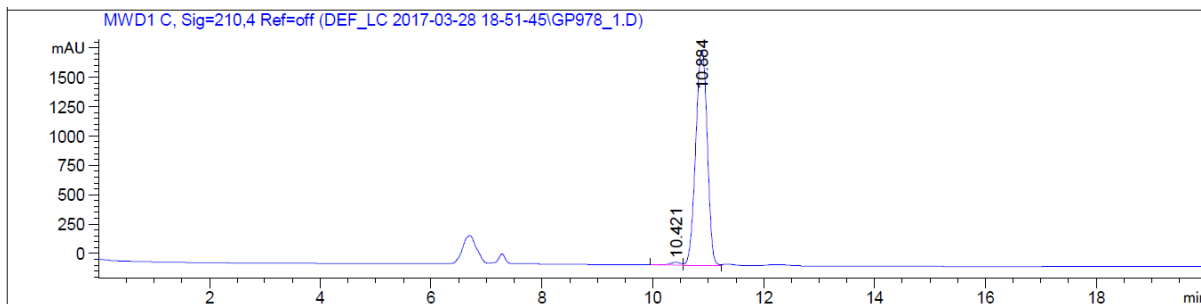

Signal 3: MWD1 C, Sig=210,4 Ref=off

| Peak # | RetTime [min] | Type | Width [min] | Area [mAU*s] | Height [mAU] | Area %  |
|--------|---------------|------|-------------|--------------|--------------|---------|
| 1      | 10.421        | BV   | 0.1945      | 308.30527    | 23.90030     | 1.1479  |
| 2      | 10.884        | VV   | 0.2312      | 2.65499e4    | 1830.76086   | 98.8521 |

Totals : 2.68582e4 1854.66117

**Enantiomeric excess = 98%**
